1  
2  
3  
4  
5  
6  
7  
8  
9  
10  
11  
12  
13  
14  
15  
16  
17  
18  
19  
20  
21  
22  
23  
24  
25  
26  
27  
28  
29  
30  
31  
32  
33  
34  
35  
36  
37  
38  
39  
40  
41  
42  
43

**BRD4 Prevents R-Loop Formation and Transcription-Replication Conflicts by Ensuring Efficient Transcription Elongation**

Drake Edwards<sup>1-3</sup>, Rohin Maganti<sup>4</sup>, Jarred P. Tanksley<sup>3</sup>, Jie Luo<sup>3</sup>, James J.H. Park<sup>3</sup>, Elena Balkanska-Sinclair<sup>3</sup>, Jinjie Ling<sup>4</sup> and Scott R. Floyd<sup>2,3\*</sup>

<sup>1</sup>Medical Scientist Training Program, Duke University School of Medicine, Durham, North Carolina 27710, USA

<sup>2</sup>Department of Pharmacology and Cancer Biology, Duke University Medical Center, Durham, North Carolina 27710, USA

<sup>3</sup>Department of Radiation Oncology, Duke University School of Medicine, Durham, North Carolina 27710, USA

<sup>4</sup>Duke University, Durham, North Carolina 27710, USA

\*Corresponding author:

Scott R. Floyd

Levine Science Research Center, Rm B233

450 Research Drive

Durham, NC 27510

919-684-9337

[scott.floyd@duke.edu](mailto:scott.floyd@duke.edu)

44 **ABSTRACT**

45           Effective spatio-temporal control of transcription and replication during S-phase is  
46 paramount to maintaining genomic integrity and cell survival. Dysregulation of these  
47 systems can lead to conflicts between the transcription and replication machinery  
48 causing DNA damage and cell death. BRD4, a BET bromodomain protein and known  
49 transcriptional regulator, interacts with P-TEFb to ensure efficient transcriptional  
50 elongation by stimulating phosphorylation of RNA Polymerase II (RNAPII). Here we  
51 report that disruption of BET bromodomain protein function causes RNAPII pausing on  
52 the chromatin and DNA damage affecting cells in S-phase. We find that this persistent,  
53 RNAPII-dependent pausing leads to accumulation of RNA:DNA hybrids (R-loops),  
54 which are known to lead to transcription-replication conflicts (TRCs), DNA damage, and  
55 cell death. Furthermore, we show that resolution of R-loops abrogates BET  
56 bromodomain inhibitor-induced DNA damage, and that BET bromodomain inhibition  
57 induces both R-loops and DNA damage at sites of BRD4 occupancy. Finally, we see  
58 that the BRD4 C-terminal domain, which interacts with P-TEFb, is required to prevent R-  
59 loop formation and DNA damage caused by BET bromodomain inhibition and that  
60 oncogenes which promote transcription and replication exacerbate BET bromodomain  
61 inhibitor-induced DNA damage. Together, these findings demonstrate that BET  
62 bromodomain inhibitors can damage DNA via induction of R-loops and TRCs in highly  
63 replicative cells.

## 64 INTRODUCTION

65 Maintaining the integrity of the genome throughout the cell cycle is paramount to  
66 cell survival(Hanahan and Weinberg, 2011), and therefore complex systems have  
67 evolved to tackle various threats to the genome's integrity(Blackford and Jackson, 2017;  
68 Cimprich and Cortez, 2008; Hamperl and Cimprich, 2016). During S-phase, areas of  
69 chromatin that are engaged with generating RNA transcripts must be coordinated with  
70 migrating replication forks. Disruption of either transcription or replication control and  
71 coordination can lead to the desynchronization of these chromatin-based activities,  
72 resulting in transcription-replication conflicts (TRCs) and subsequent replication stress,  
73 DNA damage, and cell death(Aguilera and Gómez-González, 2017; Gaillard and  
74 Aguilera, 2016; Garcia-Muse and Aguilera, 2016; Hage et al., 2010; Sollier and  
75 Cimprich, 2015). To avoid these collisions, these processes are separated in both time  
76 and space through the activity of several known chromatin-based complexes(Hamperl  
77 and Cimprich, 2016). Specifically, the processivity of both the replication machinery and  
78 the nascent RNA strand are paramount in preventing collisions between the two  
79 (Schwab et al., 2015; Zeman and Cimprich, 2014). These systems are an active area of  
80 study, especially in cancer cells, as many amplified transcription programs and more  
81 frequent replication distinguish cancer cells from normal cells(Kotsantis et al., 2016a;  
82 Stork et al., 2016). The strategies that cancer cells employ to avoid TRCs are therefore  
83 of potential therapeutic interest, as the components of these TRC avoidance  
84 mechanisms could be targeted with wide therapeutic window in variety of cancers.

85 One source of TRCs is the aberrant formation of RNA:DNA hybrids (R-loops),  
86 caused by nascent RNA re-annealing with its DNA template strand forming a three-

87 stranded structure (Aguilera and Gómez-González, 2017; Costantino and Koshland,  
88 2018; Crossley et al., 2019; Garcia-Muse and Aguilera, 2019; Hamperl et al., 2017;  
89 Hamperl and Cimprich, 2016; Richard and Manley, 2016; Santos-Pereira and Aguilera,  
90 2015; Sollier and Cimprich, 2015). R-loops play various physiological roles, including Ig  
91 class-switching, CRISPR-Cas9 bacterial defense systems, and normal transcription  
92 regulation(Chaudhuri and Alt, 2004; Garcia-Muse and Aguilera, 2019; Shao and  
93 Zeitlinger, 2017a; Skourti-Stathaki and Proudfoot, 2014; Stuckey et al., 2015; Xiao et  
94 al., 2017). However, pathologic R-loops can also form from dysregulated transcription,  
95 and these pathologic R-loops can impede the progression of the transcription  
96 bubble(Crossley et al., 2019). In the case where RNAPII is stalled, the nascent RNA is  
97 allowed to re-anneal with its template strand and form a stable R-loop leading to  
98 tethering of RNAPII to the chromatin. During S-phase, these R-loop-tethered  
99 transcription bubbles create a roadblock for replication forks(Gan et al., 2011; Matos et  
100 al., 2019). If these roadblocks are not resolved, collisions with the replication machinery  
101 will lead to replication fork breakdown and DNA strand breaks. Important factors have  
102 been identified that prevent and resolve R-loops, including the RNAPII activator CDK9  
103 and the RNA:DNA hybrid endonuclease RNase H1(L. Chen et al., 2017; Grunseich et  
104 al., 2018; Matos et al., 2019; Morales et al., 2016; Nguyen et al., 2017; Parajuli et al.,  
105 2017; Shivji et al., 2018; Skourti-Stathaki et al., 2011; Wahba et al., 2011; Wessel et al.,  
106 2019a; Zatreanu et al., 2019).

107 BRD4, a member of the bromodomain and extra-terminal domain (BET) protein  
108 family, is a known regulator of transcription elongation. Through its C-terminal domain  
109 (CTD) it is known to activate CDK9, the RNAPII-phosphorylating component of the

110 positive transcription elongation factor, P-TEFb(R. Chen et al., 2014; Itzen et al., 2014;  
111 Jang et al., 2005; Kanno et al., 2014; Liu et al., 2013; Patel et al., 2013; Rahman et al.,  
112 2011; Winter et al., 2017; W. Zhang et al., 2012). After RNAPII has initiated transcription  
113 and paused, at many genomic loci, BRD4 releases P-TEFb from its inhibitory complex  
114 and allows CDK9 to phosphorylate the second serine of the YSPTSPS repeat on the tail  
115 of RNAPII (RNAPII<sub>pS2</sub>). Once this phosphorylation event occurs, RNAPII is able to  
116 enter the elongation phase of transcription. Consequently, inhibition of BRD4 function  
117 reduces transcription of many transcripts(Delmore et al., 2011; Filippakopoulos et al.,  
118 2010a; Muhar et al., 2018; Winter et al., 2017).

119 BET family inhibitors have shown activity in pre-clinical models of several  
120 cancers, and clinical trials have shown efficacy, yet mechanisms of action and  
121 predictive biomarkers remain elusive. Recently, members of the BET bromodomain  
122 family have been implicated in both replication stress, and R-loop biology(Bowry et al.,  
123 2018; Kim et al., 2019; Wessel et al., 2019a). In an effort to illuminate the role BRD4  
124 plays in preventing cancer cell death, we studied how the DNA damage repair systems  
125 react to BET inhibition. We see that BET inhibitors cause double strand breaks in cells  
126 undergoing S-phase replication. Furthermore, we see that overexpression of full-length  
127 BRD4 rescues the effects of BRD4 loss, but rescue fails when BRD4 is truncated to  
128 delete the P-TEFb-interacting C-terminal domain (CTD). Finally, we see that BET  
129 inhibitors cause an RNAPII-dependent increase in the formation of R-loops, and that  
130 overexpression of RNase H1, an endonuclease that acts on the RNA strand of R-loops,  
131 reverses BET inhibitor-induced DNA damage. These data suggest a new role for BRD4

132 in preventing aberrant R-loop formation and TRCs by ensuring efficient RNAPII  
133 transcription.

## 134 RESULTS

### 135 Inhibition or degradation of BET family proteins leads to spontaneous DNA 136 damage in cancer cells

137 BRD4, through its two N-terminal bromodomains, interacts with the chromatin by  
138 binding to acetylated histones(Filippakopoulos et al., 2012). In previous work, we have  
139 described how a low abundance isoform of BRD4 (Isoform B) mediated chromatin  
140 dynamics and DNA damage signaling in the presence of radiation(Floyd et al., 2013a).  
141 However, small molecule BET bromodomain protein inhibitors are effective against  
142 cancer cells in the absence of radiation(Asangani et al., 2014; Dawson et al., 2011;  
143 Rathert et al., 2015; Zuber et al., 2011). Several groups have reported variable effects  
144 of BET bromodomain inhibitors on DNA damage signaling (Bowry et al., 2018; Floyd et  
145 al., 2013b; Kim et al., 2019; Pericole et al., 2019; Schröder et al., 2012; Sun et al., 2018;  
146 J. Zhang et al., 2018). We therefore sought to understand the DNA damage  
147 consequences of BET bromodomain inhibition. JQ1, a small molecule inhibitor of BET  
148 family proteins, binds to the bromodomains and competitively prevents BRD4 from  
149 interacting with chromatin(Filippakopoulos et al., 2010a). In order to test whether JQ1  
150 was able to induce a DNA damage response, we treated HeLa and HCT-116 cells with  
151 (500 nM) JQ1 for 16 hours and stained for  $\gamma$ H2AX foci, a marker of DNA  
152 damage(Rogakou et al., 1998). We observed that JQ1 was able to induce  $\gamma$ H2AX foci  
153 formation, indicating that BET proteins can prevent spontaneous DNA damage (**Figure**  
154 **1A; Figure 1B; Figure S1A; Figure S1B**). In addition to JQ1, other small molecules  
155 that have been used in clinical trials or target a specific bromodomain also led to an

156 increase in  $\gamma$ H2AX signaling in HeLa cells at clinically relevant doses (Faivre et al.,  
157 2020; Odore et al., 2015; Ozer et al., 2018; Piha-Paul et al., 2019)(**Figure 1H**).

158 Recently, a small molecule, dBET6, has been shown to cause rapid degradation  
159 of BET proteins(Winter et al., 2017). dBET6, as with other PROTAC molecules, links to  
160 an E3-ligase recruiter which causes ubiquitination and subsequent, rapid degradation of  
161 target proteins. Advantages of dBET6 are that it allows for the visualization of BET  
162 protein loss and acts as a more potent BET protein inhibitor with rapid kinetics. We  
163 observed that dBET6 elicited a robust DNA damage response detectable by western  
164 blot in HeLa cells at 100 nM concentration in as few as 6 hours. Concurrent with  
165 dBET6-induced loss of BET proteins, we observed a reduction in RNA Polymerase II  
166 phospho-Serine 2 and saw  $\gamma$ H2AX signaling both by western blot and  
167 immunofluorescence (**Figure 1C; Figure 1D; Figure 1E**). These observations  
168 confirmed that loss of BET proteins can result in increased DNA damage signaling.

169 While  $\gamma$ H2AX is a general marker for DNA damage signaling, we wanted to  
170 establish whether BET protein loss also leads to an increase in physical DNA damage  
171 such as double strand breaks. We therefore employed single cell electrophoresis  
172 (comet assay) to measure the amount of DNA double strand breaks after dBET6  
173 treatment. Interestingly, we found that in addition to the DNA damage signaling  
174 increase, dBET6 increased the number of DNA double strand breaks (**Figure 1F;**  
175 **Figure 1G**). These observations indicate that loss of the BET family of proteins can  
176 cause physical DNA damage as well as a robust DNA damage response.

177

178 **BET protein loss induces DNA damage during S-phase**



179 TRCs, by definition, occur while the cell is actively replicating its genome during  
180 S-phase. An active replication fork, when it collides with a transcription bubble in the  
181 head-on orientation, leads to fork stalling, DNA damage, and cell death(Hamperl et al.,  
182 2017). While probing for DNA damage following BET protein loss in  
183 immunofluorescence microscopy studies, we noticed heterogeneity in which cells would  
184 display  $\gamma$ H2AX foci following dBET6 exposure. Prior work from other groups showed  
185 that BRD4 loss leads to a loss of S-phase cells(Maruyama et al., 2002a). While this has  
186 been described as a G1/S phase arrest, we decided to test whether actively replicating  
187 S-phase cells could be prone to DNA damage after BRD4 loss.

188 To test whether BET protein loss leads to DNA damage preferentially in actively  
189 replicating cells, we labeled HeLa cells with EdU to monitor actively replicating cells  
190 while simultaneously treating with dBET6 for two hours. Accordingly, we observed that  
191  $\gamma$ H2AX foci formed only in the cells that were labeled with EdU by immunofluorescence  
192 **(Figure 2A; Figure 2B)**. We also labeled OCI-AML2 cells, another JQ1 sensitive cell  
193 line(Fiskus et al., 2014; Zhou et al., 2018), and also saw that EdU positive cells showed  
194 the most DNA damage following dBET6 treatment **(Figure S2A; Figure S2B)**. These  
195 data indicate that BET protein loss is specifically leading to DNA damage in cells that  
196 are actively replicating in S-phase.

197 To determine whether the S-phase-specific DNA damage following BET LOF  
198 was associated with cell death, we performed cell cycle analysis of HeLa cells treated  
199 with JQ1 or dBET6. Previous work has shown that apoptotic cells display as a broad  
200 hypodiploid (sub-G<sub>1</sub>) peak(Riccardi and Nicoletti, 2006). Interestingly, following BET  
201 LOF, we observed a decrease in the S-phase population of cells and a corresponding

202 increase in the sub-G<sub>1</sub> population (**Figure 2C; Figure 2D; Figure 2E**). These cell cycle  
203 changes indicate that BET LOF lead to cell death of cells in S-phase.

204         These observations also correlated with replication stress and apoptotic  
205 signaling. RPA2, a downstream target of the replication stress master kinase ATR, is  
206 known to be phosphorylated on Serine 33 (RPA2-pS33) by ATR in response to  
207 replication stress(Olson et al., 2006). BET inhibition with dBET6 caused a robust  
208 increase in RPA2-pS33 (**Figure 2F**), indicating that BET inhibition causes replication  
209 stress, and providing further evidence that BET protein loss leads to S-phase  
210 dependent damage. Furthermore, in dBET6-treated cells, we saw increased levels of  
211 cleaved Poly(ADP-ribose) (cPARP) indicating that this S-phase damage was not  
212 effectively repaired, and caused cell death (**Figure 2F**).

213         Finally, to understand whether BET LOF led to dysregulation of replication, we  
214 used DNA fiber analysis to observe the progression of replication forks following  
215 treatment of dBET6. Interestingly, we found that treatment with dBET6 led to a  
216 significant decrease in CldU incorporation, indicating that BET LOF leads to a decrease  
217 in replication fork progression (**Figure 2G; Figure 2H**). Taken together, these data  
218 demonstrate that BET LOF leads to an increase in replication stress and cell death in  
219 actively replicating cells.

220

## 221 **The C-Terminal Domain of BRD4 is necessary to prevent DNA damage caused by** 222 **BET protein loss**

223         The BET protein family consists of four members: BRD2, BRD3, BRD4, and  
224 BRDT (of note, BRDT is expressed mainly in the testes)(Pivot-Pajot et al., 2003).

225 Inhibitors of this family of proteins, namely JQ1 and the degrader dBET6, function by  
226 binding to the bromodomains which are shared by all members. Thus, it is important to  
227 elucidate how the various BET bromodomain proteins contribute to the DNA damage  
228 seen by dBET6 treatment. To test this, we used siRNA to knock down BRD2, BRD3,  
229 and BRD4 and measured  $\gamma$ H2AX signaling (**Figure 3A; Figure S3A**). After 72 hours of  
230 knock down, we observed that both BRD2 and BRD4 loss led to increased  $\gamma$ H2AX  
231 signaling, similar to recent reports(Kim et al., 2019). Owing to a wealth of studies that  
232 established mechanisms of BRD4 in transcription regulation, and earlier work showing  
233 replication dysfunction caused by BRD4 loss(Bisgrove et al., 2007; Maruyama et al.,  
234 2002b; Wessel et al., 2019a; Winter et al., 2017), we focused on the role of BRD4 in the  
235 prevention of S-phase DNA damage.

236 The full-length isoform of BRD4, isoform A, contains several known domains,  
237 including two bromodomains, an extra-terminal domain, and a C-terminal domain  
238 (**Figure 3B**). The two bromodomains, which bind to acetylated lysine on histone tails,  
239 and the extra-terminal domain are shared among all BET protein members. The C-  
240 terminal domain, however, is unique to BRD4 isoform A and interacts with the P-TEFb  
241 complex that contains CDK9, leading to Serine 2 phosphorylation of RNAPII and  
242 transcription pause-release(R. Chen et al., 2014; Itzen et al., 2014; Jang et al., 2005;  
243 Kanno et al., 2014; Liu et al., 2013; Patel et al., 2013; Rahman et al., 2011; Winter et  
244 al., 2017; W. Zhang et al., 2012). Also, previous work showed that CDK9 inhibition  
245 leads to paused RNAPII and an increase in R-loops (J.-Y. Chen et al., 2019). Thus, we  
246 hypothesized that BRD4 loss could also lead to CDK9 dysfunction, resulting in R-loops

247 and DNA damage. Moreover, we reasoned that the P-TEFb-interacting CTD would be  
248 required to prevent TRCs and DNA damage.

249 To determine the mechanism behind damage caused by BET protein loss, we  
250 developed a panel of inducible BRD4 overexpression constructs in order to test their  
251 ability to rescue the effects of dBET6 (**Figure 3B**). The panel included two naturally  
252 occurring isoforms, A and C. Isoform A being the full length isoform mentioned above,  
253 and isoform C as a shorter isoform only including the two bromodomains and the extra-  
254 terminal domain(Floyd et al., 2013b) (and lacking the CTD). We also developed a  
255 truncated construct of isoform A missing only the CTD (A $\Delta$ CTD) which has previously  
256 shown to interact with CDK9(Bisgrove et al., 2007). Finally, we developed a construct  
257 excluding the extra-terminal domain (C $\Delta$ ET). These constructs were used to develop  
258 stable cell lines under doxycycline control to overexpress the BRD4 isoforms (**Figure**  
259 **S3B**).

260 In order to determine whether BRD4 isoform A (full length isoform) was able to  
261 rescue the DNA damage effects caused by dBET6, we induced isoform A expression  
262 with doxycycline for 24 hours before treatment with dBET6. We found that isoform A  
263 was indeed able to rescue the  $\gamma$ H2AX signaling caused by dBET6 (**Figure 3C; Figure**  
264 **3D; Figure S3C**). While we saw that isoform A was able to rescue the effects of dBET6  
265 treatment, the protein levels of overexpression construct remaining after dBET6  
266 treatment were difficult to detect by Western blot. To further verify rescue of TRC-  
267 induced DNA damage by BRD4 isoform A, we measured BRD4 levels by  
268 immunofluorescence staining of dBET6-treated cells that either did, or did not, contain  
269 the overexpression construct (**Figure S3D**). As expected, isoform A was still present

270 after dBET6 treatment only in cells expressing the induced rescue construct, confirming  
271 that the rescue of  $\gamma$ H2AX was due to isoform A still being present. We also observed  
272 that isoform A was able to rescue the loss of RNAPII $\psi$ S2, indicating that overexpressing  
273 full-length BRD4 was able to ensure efficient transcription elongation even in the  
274 presence of dBET6. These data suggest that BRD4 is sufficient in rescuing the effects  
275 of dBET6. Next, we applied the same conditions to the entire panel of BRD4  
276 overexpression constructs by western blot (**Figure 3C; Figure 3D**). Importantly, none of  
277 the other overexpression constructs was able to rescue either the  $\gamma$ H2AX signaling or  
278 the loss of RNAPII $\psi$ S2. Furthermore, we saw that only isoform A was able to rescue the  
279 S-phase specific  $\gamma$ H2AX foci caused by dBET6 treatment (**Figure 3E; Figure 3F**).  
280 These observations indicate that the C-terminal domain (CTD) is required to prevent  
281 BET inhibitor-induced loss of RNAPII $\psi$ S2 and S-phase DNA damage.

282         Next, we wanted to elucidate whether the CTD of BRD4 was necessary to rescue  
283 the DNA double strand breaks caused by dBET6 treatment. To test this, we used a  
284 comet assay to quantify the breaks following dBET6 treatment following overexpression  
285 of isoform A or A $\Delta$ CTD. Again, we saw that isoform A, but not A $\Delta$ CTD, was able to  
286 rescue the dBET6-induced DNA double strand breaks. This further indicates that the C-  
287 terminal domain of BRD4 is necessary to prevent DNA double strand breaks in S-  
288 phase, and points to a mechanism involving both transcription and replication.

289

## 290 **BET inhibition leads to an increase in R-loop-dependent DNA damage**

291         R-loops have been previously shown to cause TRCs and replication stress in  
292 cancer(Aguilera and Gómez-González, 2017; Costantino and Koshland, 2018; Crossley

293 et al., 2019; Garcia-Muse and Aguilera, 2019; Hamperl et al., 2017; Hamperl and  
294 Cimprich, 2016; Richard and Manley, 2016; Santos-Pereira and Aguilera, 2015; Sollier  
295 and Cimprich, 2015). Specifically, an R-loop is able to tether a persistently-paused  
296 RNAPII to the chromatin, creating a roadblock for the replication machinery. RNAPII,  
297 after initiation of transcription of ~50 bp, becomes paused until a second  
298 phosphorylation event of the second serine on its tail. BRD4, through its C-terminal  
299 domain, activates CDK9 to undergo this phosphorylation event and ensure efficient  
300 transcription elongation(Bisgrove et al., 2007; R. Chen et al., 2014; Itzen et al., 2014;  
301 Jang et al., 2005; Krueger et al., 2010; Patel et al., 2013). Previous work has also  
302 shown that loss of BRD4 leads to decreased traveling ratios of RNAPII after dBET6  
303 treatment, indicating that RNAPII is paused on the chromatin(Winter et al., 2017).  
304 Furthermore, previous studies have indicated that direct chemical inhibition of CDK9  
305 leads to stalled RNAPII and an increase in R-loop formation(L. Chen et al., 2017; Shao  
306 and Zeitlinger, 2017a). Therefore, we hypothesized that loss of BRD4 may also lead to  
307 an increase of R-loops, and that those R-loops are responsible for the S-phase damage  
308 seen after BRD4 loss.

309 To determine whether BRD4 loss leads to an increase in R-loop formation, we  
310 employed the R-ChIP-seq technique which has previously been described as a way to  
311 detect R-loop formation on the chromatin(J.-Y. Chen et al., 2019). R-ChIP employs the  
312 use of a catalytically inactive form of the R-loop-specific endonuclease, RNase H1. The  
313 mutation, D210N, allows RNase H1 to bind to, but not resolve, R-loops. The construct is  
314 tagged with a V5 peptide, which then allows it to be enriched from crosslinked cells,  
315 along with associated chromatin, for ChIP-sequencing (**Figure S4A**). We performed R-

316 ChIP-seq in dBET6-exposed cells and found dramatic increases in global R-loop  
317 formation (**Figure 4A**). Similarly, we saw globally increased  $\gamma$ H2AX ChIP signal in  
318 dBET6-treated cells. Furthermore, we validated three previously described(Liu et al.,  
319 2013) BRD4 occupying loci using R-ChIP-qPCR (**Figure 4B; Figure 4C**). Surprisingly,  
320 while we saw most of the R-loop formation near the promoter regions, there was also  
321 increased R-loop formation throughout the length of the gene. In addition, we also saw  
322 a decrease of RNAPII $\rho$ S2 along the length of these loci as well and an increase in  
323 RNAPII travel ratio which has been reported previously (Winter et al., 2017)(**Figure**  
324 **S4B; Figure S4C**). This indicates that BRD4 not only prevents pause-release of  
325 RNAPII, but also prevents the accumulation of R-loops and RNAPII stalling throughout  
326 the length of the gene.

327 We next postulated that the R-loops formed by BRD4 loss could be the root  
328 cause of the S-phase DNA damage we observed. To elucidate this, we employed the  
329 overexpression of V5-tagged wild-type RNase H1, which is known to be able to resolve  
330 R-loops and reverse DNA damage caused by their existence(Matoss et al., 2019). As a  
331 negative control, we used a V5-tagged RNase H1 mutant, containing mutations at  
332 W43A, K59A, K60A and D210N (WKKD), which has been previously described to lack  
333 both the catalytic activity as well as the DNA binding activity of RNase H1(L. Chen et  
334 al., 2017). To test whether RNase H1 was able to rescue the S-phase DNA damage  
335 caused by BRD4 loss, we overexpressed either the WT RNase H1 or the WKKD mutant  
336 construct, treated with dBET6, and stained for V5, EdU, and  $\gamma$ H2AX (**Figure 4D; Figure**  
337 **4E; Figure S4D**). Consistent with our hypothesis that BET inhibition leads to DNA  
338 damage via increased formation of R-loops, over-expression of WT RNaseH1, but not

339 the non-binding WKKD mutant, rescued the DNA damage induced by BRD4 loss in EdU  
340 positive cells. We then sought to test whether RNase H1 was able to rescue the DNA  
341 double strand breaks caused by dBET6 (**Figure 4F; Figure 4G**). Similarly, we observed  
342 that RNase H1 was also able to rescue these DNA double strand breaks. These data  
343 indicate that following BRD4 loss, R-loops form and lead to DNA damage in S-phase,  
344 likely from TRCs.

345 As BRD4 plays a regulatory role in the transcription of many genes, we sought to  
346 understand whether BRD4 was playing a direct role in preventing R-loop formation, or  
347 whether it was indirectly preventing R-loop formation through the transcriptional control  
348 of other proteins implicated in R-loop processing. SETX and SRSF1 have both been  
349 previously shown to be involved with R-loop processing(Li and Manley, 2005; Sollier et  
350 al., 2014). We saw that dBET6 treatment did not impact the level of neither SETX nor  
351 SRSF1 in the timeframe when the R-loop-dependent TRCs and DNA damage occurred  
352 (**Figure S4E**).

353 In order to dissect the mechanism of BET LOF-induced TRCs and DNA damage,  
354 we explored whether knock down of other proteins associated with transcription would  
355 have an effect on DNA damage caused by BET LOF. HEXIM normally holds CDK9 in  
356 an inhibitory complex until activated by BRD4(R. Chen et al., 2014; Krueger et al.,  
357 2010). In addition, the nuclear excision factors XPG and XPF have been implicated in  
358 the resolution of R-loops in transcription termination(Sollier et al., 2014). Interestingly,  
359 knock down of these proteins also did not have an effect on the DNA damage caused  
360 by dBET6 (**Figure S4F; Figure S4G**).



361 Topoisomerases, which relieve torsional stress produced by the movement of  
362 both the replication fork and transcription bubble, are important in preventing replication  
363 stress caused by TRCs(Bermejo et al., 2012). Specifically, the activity of Top1 has been  
364 implicated in relieving negative supercoiling behind a transcription bubble that can lead  
365 to R-loop formation(Drolet et al., 1995; Hage et al., 2010; Massé et al., 1997). In  
366 addition, BET inhibition has been previously shown to kill cells synergistically with the  
367 topoisomerase I inhibitor, camptothecin(Baranello et al., 2016; Wessel et al., 2019b).  
368 We therefore measured DNA damage after Top1 inhibition alone or in combination with  
369 bromodomain degradation. As expected, exposing HeLa cells to either dBET6 or  
370 camptothecin alone results in DNA damage, however, the combination showed additive  
371 effects, indicating that BRD4 may be causing DNA damage through mechanisms  
372 additional to Top1 inhibition (**Figure S4H**). Indeed, prior work indicates that BRD4-  
373 stimulated activation of Top1 proceeds through an N-terminal kinase activity(Baranello  
374 et al., 2016). Our data indicates that this N-terminal BRD4 activity is insufficient to  
375 rescue the TRC-driven DNA damage that we observe specifically in S-phase (**Figure 3**).

376 Topoisomerase II has been implicated in the generation of transcription-  
377 dependent DNA double strand breaks (Canela et al., 2019; Kim et al., 2019). Therefore,  
378 we measured the effect of topoisomerase II inhibition and knock down on BETi-induced  
379 DNA damage. In contrast to recently reported findings involving BRD2, we saw that  
380 Top2 inhibition with dexrazoxane acted synergistically with dBET6 in HeLa cells to  
381 increase DNA damage signaling (**Figure S4H**). Similarly, we observed that siRNA  
382 knock down of Top2 $\alpha$  or Top2 $\beta$  in HeLa cells had a small but not significant effect on  
383 the DNA damage caused by dBET6 (**Figure S4F**; **Figure S4G**). Lastly, generation of

384 transcription-dependent DNA double strand breaks by Top2 has been linked to  
385 proteasomal degradation of Top2 (Canela et al., 2019; Kim et al., 2019). However, as  
386 shown in **Figure 6A**, co-treatment of OCI-AML2 cells with dBET6 and the proteasome  
387 inhibitor MG-132 lead to greatly enhanced DNA damage. Taken together, these findings  
388 point to a mechanism of BET loss-induced DNA damage that is distinct from BRD2  
389 effects and involves BRD4 protecting against S-phase dependent damage and TRCs  
390 through suppression of R-loop formation.

391

### 392 **Active transcription and RNAPII occupancy are required for BET protein-loss** 393 **induced damage**

394       There are five stages of transcription: RNAPII recruitment, initiation,  
395 pause/release, elongation, and termination(Haberle and Stark, 2018; Porrua and Libri,  
396 2015). Transcription initiation is denoted by a phosphorylation event in which CDK7, a  
397 subunit of TFIIF, phosphorylates Serine-5 on the tail of RNAPII(Komarnitsky et al.,  
398 2000). After ~50bp of nascent transcription, RNAPII undergoes a pausing event until  
399 CDK9, a subunit of P-TEFb, phosphorylates Serine-2 on the tail of RNAPII(Baumli et al.,  
400 2012). Inhibitors of these two kinases exist and have been shown to have different  
401 effects on RNAPII occupation of chromatin(Shao and Zeitlinger, 2017a). Triptolide  
402 (TRP) inhibits TFIIF and results in the blocking of transcription initiation and the  
403 degradation of RNAPII (**Figure S5A**). DRB inhibits CDK9 and leads loss of RNAPIIpS2  
404 and stalling of RNAPII on the chromatin, resulting in R-loops and TRCs(L. Chen et al.,  
405 2017; Shao and Zeitlinger, 2017b) (**Figure S5B**). With this understanding, we

406 hypothesized that these two molecules would have differing effects on the DNA damage  
407 caused by BRD4 loss.

408 To test whether degradation of RNAPII with TRP would be able to rescue the  
409 DNA damage effects of dBET6 treatment, we designed an experiment to pre-treat and  
410 manipulate RNAPII prior to dBET6 exposure, as described in **Figure 5A**. After pre-  
411 treating with either TRP or DRB, we washed out the drugs and treated with dBET6 for  
412 one hour. Following the dBET6 treatment, cells were fixed and stained for  $\gamma$ H2AX  
413 (**Figure 5B; Figure 5C**). Remarkably, we saw that TRP was able to rescue the DNA  
414 damage effects of dBET6, while DRB was not. We then co-treated HCT-116 cells with  
415 TRP and dBET6 in and saw that TRP was also able to rescue the DNA damage effects  
416 caused by dBET6 in this cell line (**Figure S5C; Figure S5D**). These data indicate that  
417 RNAPII occupation on the chromatin is necessary for DNA damage caused by BRD4  
418 loss.

419 We also wanted to explore the relationship between RNAPII<sub>pS2</sub> and DNA  
420 damage caused by dBET6 treatment. We observed that when BRD4 isoform A is  
421 overexpressed, there is an increase in RNAPII<sub>pS2</sub> (**Figure 5D**). In addition, we see that  
422 RNAPII<sub>pS2</sub> negatively correlates with  $\gamma$ H2AX following dBET6 treatment both in HeLa  
423 cells and HEK-293T cells (**Figure 5E; Figure S5E; Figure S5F**). These data again  
424 suggest that the loss of BRD4 leads to loss of transcription and pausing of RNAPII on  
425 the chromatin causing TRCs and subsequent DNA damage.

426

427 **Oncogene-induced enhanced transcription exacerbates BET loss-induced DNA**  
428 **damage.**

429 BET proteins have been previously linked to regulation of the oncoprotein, c-Myc  
430 (Delmore et al., 2011; Fowler et al., 2014; Mertz et al., 2011; Muhar et al., 2018; Winter  
431 et al., 2017). In addition, studies have shown that increased levels of transcription due  
432 to increased expression of MYC leads to increased replication stress(Kotsantis et al.,  
433 2016b; Lin et al., 2012; Puccetti et al., 2019). We hypothesized that stabilizing c-Myc  
434 would sensitize cancer cells to the effects of BET LOF.

435 To test this, we co-treated OCI-AML2 cells with dBET6 and MG-132, a small  
436 molecule which targets the proteasome. When cells were treated with dBET6, we  
437 observed the expected rapid loss of c-Myc (**Figure 6A**). However, co-treating cells with  
438 dBET6 and MG-132 stabilized c-Myc. Surprisingly, this also led to a synergistic increase  
439 in  $\gamma$ H2AX signal by western blot (**Figure 6A; Figure 6B**). This indicated to us that  
440 increased transcriptional signaling from c-Myc primed cells for even more replication  
441 stress following BET LOF.

442 We hypothesized that additional oncogene signaling that enhances transcription  
443 and is known to enhance R-loops (Kotsantis et al., 2016b) would also enhance DNA  
444 damage and other effects from BET LOF. Therefore, we measured the DNA damage  
445 response in normal mouse embryonic fibroblasts exposed to JQ1 and compared this to  
446 responses in murine cells expressing mutant KRAS (**Figure 6C**). As expected, the  
447 mutant KRAS-expressing cells showed greatly enhanced  $\gamma$ H2AX, RPApS33, and  
448 cleaved caspase 3 indicating that oncogene expression sensitizes cells BET  
449 bromodomain inhibition-dependent DNA damage and cell death.

450

451

## 452 DISCUSSION

453 Inhibitors of BRD4 have been shown to be effective treatments for several  
454 cancers, yet the mechanism of action remains unclear (Asangani et al., 2014; Dawson et  
455 al., 2011; Rathert et al., 2015; Zuber et al., 2011). Specifically, questions remain as to  
456 the mechanism by which inhibition of BRD4, which controls global transcription (Winter  
457 et al., 2017), may preferentially impact cancer cells more than normal cells – a feature  
458 that is required of all effective chemotherapies. Here, we propose a novel role for BRD4  
459 in the prevention of R-loops, TRCs, S phase-dependent DNA damage, and cell death in  
460 highly transcription and replication-driven cells (**Figure 6D**).

461 Our data show that inhibition or degradation of BET proteins, with JQ1 or dBET6  
462 respectively, leads to an accumulation of DNA damage signaling and DNA double  
463 strand breaks. When we characterized the nature of the DNA damage, we found that, in  
464 the several cell types we investigated, the cell cycle state dictated whether or not a cell  
465 accumulated this damage. Specifically, we saw that cells actively undergoing replication  
466 in S-phase preferentially exhibited DNA damage and cell death following BET protein  
467 LOF. Historically, BET proteins have been shown to play a major role in transcription  
468 regulation, thus we postulated that the S-phase dependent DNA damage caused by  
469 BET protein loss could be working through a mechanism of increased TRCs.

470 Due to the fact that BET protein inhibitors such as JQ1 and degraders such as  
471 dBET6 target the bromodomains of BRD2, BRD3, and BRD4, it was previously unclear  
472 if one member of the family is responsible for the DNA damage caused by BET protein  
473 loss. Several works have shown that the different BET proteins have both unique and  
474 shared roles in the cell (Cheung et al., 2017; Hsu et al., 2017; LeRoy et al., 2008). Our

475 data show that while both BRD2 and BRD4 show increased  $\gamma$ H2AX signaling after 72  
476 hours, overexpression of the full-length isoform (isoform A) was sufficient to effectively  
477 rescue the DNA damage effects of BET protein degradation by treatment with dBET6.  
478 Specifically, we observed that the C-terminal domain of BRD4 was necessary to rescue  
479 this effect. Our data and the literature show that the C-terminal domain plays a critical  
480 role in the activation of RNAPII to ensure efficient elongation(R. Chen et al., 2014; Itzen  
481 et al., 2014; Jang et al., 2005; Kanno et al., 2014; Liu et al., 2013; Patel et al., 2013;  
482 Rahman et al., 2011; Winter et al., 2017; W. Zhang et al., 2012). BRD4, through its C-  
483 terminal domain, interacts with CDK9 to phosphorylate Serine-2 on the heptapeptide  
484 repeat on the tail of RNAPII. This phosphorylation event allows RNAPII to proceed with  
485 transcription elongation on schedule. Previous studies have identified DRB, a small  
486 molecule inhibitor of CDK9, as a factor that increases R-loop formation (L. Chen et al.,  
487 2017). Our work adds to this finding by identifying BRD4, a physiological activator or  
488 CDK9, as an important R-loop regulator. Our findings show that BRD4 loss of function  
489 causes S-phase-dependent DNA damage through a novel TRC mechanism, specifically  
490 in highly transcription-replication driven cells. This novel mechanism is distinct from that  
491 proposed for BET bromodomain proteins in other recent work (Bowry et al., 2018; Kim  
492 et al., 2019) and impacts the use of BET bromodomain inhibitors, which are in clinical  
493 trials for a number of diseases..

494 In recent years, the importance of R-loops has become more apparent. While  
495 they play critical roles normal physiological activity(Chaudhuri and Alt, 2004; Garcia-  
496 Muse and Aguilera, 2019; Shao and Zeitlinger, 2017a; Skourti-Stathaki and Proudfoot,  
497 2014; Stuckey et al., 2015; Xiao et al., 2017), it has also come to light that aberrant R-

498 loops can lead to TRCs, DNA damage, and cell death(Aguilera and Gómez-González,  
499 2017; Costantino and Koshland, 2018; Crossley et al., 2019; Garcia-Muse and Aguilera,  
500 2019; Hamperl et al., 2017; Hamperl and Cimprich, 2016; Richard and Manley, 2016;  
501 Santos-Pereira and Aguilera, 2015; Sollier and Cimprich, 2015). Our data show that  
502 DNA damage caused by BRD4 loss is correlated with an increase in R-loop formation  
503 on the chromatin. Furthermore, this damage can be rescued by overexpressing RNase  
504 H1, an endonuclease that resolves R-loops. These observations indicate that some  
505 cells may depend on BRD4 to ensure that efficient transcription during S-phase  
506 prevents R-loop dependent conflicts between transcription and replication. We believe  
507 this is an important observation, especially for cells with elevated replicative and  
508 transcriptional drive. Thus, cancer cells and other highly-driven cells may be more  
509 dependent on BRD4 to prevent the transcription and replication machinery from  
510 colliding. This finding may shed light on additional prior studies. Early work on BRD4  
511 knockout mice showed both embryonic lethality and replication deficits (Houzelstein et  
512 al., 2002; Maruyama et al., 2002b). Additionally, studies of the normal tissue toxicities of  
513 whole-animal knockout of BRD4 could indicate vulnerability in rapidly replicating normal  
514 tissues(Bolden et al., 2014). Finally, it informs BET inhibition synergy with ATR  
515 inhibitors resulting in increased  $\gamma$ H2AX signaling and cell death(Pericole et al., 2019).  
516 Our proposed mechanism would predict that this synergism exists by increasing the  
517 number of TRCs while simultaneously inhibiting a cell's ability to handle replication  
518 stress.

519         One outstanding question that remains to be completely resolved is what makes  
520 a cancer cell more or less sensitive to BRD4 loss. It has been shown that certain cancer

521 cell lines are more sensitive to BET protein inhibition(Rathert et al., 2015), yet it is  
522 unclear as to why this is the case. For example, our group and others have shown that  
523 BRD4 loss in certain cell lines do not result in an increase in DNA damage signaling,  
524 although recent reports have disputed this (Bowry et al., 2018; Floyd et al., 2013b; Kim  
525 et al., 2019). Notably, it is reported that that certain cell lines do not exhibit a decrease  
526 in RNAPII $\psi$ S2 following BRD4 loss, nor do R-loops formed by BRD4 loss exhibit  
527 replication stress (Bowry et al., 2018; Kim et al., 2019). As is well known, different cells  
528 operate under different transcriptional programming. We hypothesize that certain cancer  
529 cell lines may be more globally dependent on BRD4-mediated transcriptional activation,  
530 leading to R-loops, TRCs, DNA damage, and cell death upon BET inhibition. We believe  
531 that RNAPII $\psi$ S2 loss after BRD4 degradation could be predictive of whether a cancer  
532 cell line exhibits DNA damage following treatment. Through further study of both BRD4  
533 and the role of R-loops in cancer, we hope that we can identify new chemotherapeutic  
534 targets and broaden the effectiveness of BET inhibitors in cancer therapies.



535 **FIGURE LEGENDS**

536 **Figure 1: BET protein loss of function leads to spontaneous DNA damage.**

537 **A.** Representative images and **B.** quantification of  $\gamma$ H2AX staining per nucleus in HeLa  
538 cells treated with DMSO or 500 nM JQ1 for 16 hours (>100 cells). **C.** Representative  
539 western blots from HeLa cells treated with DMSO or 100 nM dBET6 for 6 hours before  
540 harvest. **D.** Representative images and **E.** quantification of  $\gamma$ H2AX staining per nucleus  
541 in HeLa cells treated with DMSO or 100 nM dBET6 for 6 hours. **F.** Representative  
542 images and **G.** quantification of neutral single cell electrophoresis assay of HeLa cells  
543 treated with DMSO or 100 nM dBET6 for 6 hours. **H.** Representative western blots from  
544 HeLa cells treated with various BET inhibitors for 8 hours before harvest. For western  
545 blots, lysates are probed for the epitope indicated beside each panel. Student's t-test  
546 (two-tailed, unpaired) was performed on **B**, **E**, and **G**. Data represent the mean  $\pm$ SEM.  
547 \* $P < 0.05$ ; \*\* $P < 0.01$ ; \*\*\* $P < 0.001$ . Source data are provided as a Source Data file.

548

549 **Figure 2: BET protein degradation leads to replication stress and S-phase-**  
550 **dependent DNA damage.**

551 **A.** Representative images and **B.** quantification of  $\gamma$ H2AX staining per nucleus in HeLa  
552 cells treated simultaneously with 100 nM dBET6 and 10  $\mu$ M EdU for 2 hours. **C.** Cell  
553 cycle analysis of HeLa cells treated with DMSO, 500 nM JQ1, or 100 nM dBET6 for  
554 times as shown. **D.** Histogram and **E.** quantification of sub-G1 populations of HeLa cells  
555 before and after treatment with 100 nM dBET6. **F.** Representative western blot images  
556 of lysates from HeLa cells treated with DMSO or 100 nM dBET6 for 6 hours probed for  
557 the epitope indicated beside each panel. **G.** Representative images and **H.**

558 quantification of DNA fiber analysis of HeLa cells treated with DMSO or 100 nM dBET6.  
559 Cells in **C.**, **D.**, and **E.** were fixed after treatment, stained with PI, and quantified for DNA  
560 content using flow cytometry. Student's t-test (two-tailed, unpaired) was performed on  
561 **B.** and **H.** Data represent the mean  $\pm$ SEM. \* $P < 0.05$ ; \*\* $P < 0.01$ ; \*\*\* $P < 0.001$ . Source  
562 data are provided as a Source Data file.

563

564 **Figure 3: The C-terminal domain of BRD4 is required to prevent TRCs.**

565 **A.** Representative western blots of HeLa cells treated with siControl, siBRD2, siBRD3,  
566 or siBRD4 for 72 hours and probed for the epitope indicated beside each panel. **B.**  
567 Domain structure of overexpression constructs depicting the location of the  
568 bromodomains, extra-terminal domain, and C-terminal domain of BRD4. **C.**  
569 Representative images and **D.** quantification of western blots from HeLa cells stably  
570 infected with each BRD4 construct and induced with doxycycline for 24 hours before  
571 being treated with 10 nM dBET6 for 6 hours and harvested: lysates were probed for the  
572 epitope indicated beside each panel. **E.** Representative images and **F.** quantification of  
573  $\gamma$ H2AX staining per nucleus in EdU-positive HeLa cells induced as in **D** and then  
574 simultaneously treated with 10 nM dBET6 and 10  $\mu$ M EdU for 2 hours. **G.**  
575 Representative images and **H.** quantification of neutral single cell electrophoresis assay  
576 of HeLa cells induced as in **D** followed by treatment with DMSO or 10 nM dBET6 for 6  
577 hours. Student's t-test (two-tailed, unpaired) was performed on **D**, **F**, and **H**. Data  
578 represent the mean  $\pm$ SEM. \* $P < 0.05$ ; \*\* $P < 0.01$ ; \*\*\* $P < 0.001$ . Source data are  
579 provided as a Source Data file.

580

581 **Figure 4: BET inhibition leads to an increase in R-loop-dependent DNA damage**

582 **A.** Global ChIP-seq and R-ChIP-seq signal relative to input for HeLa cells treated with  
583 DMSO or dBET6 as shown. The right panel depicts how different colors represent the  
584 ChIP-seq or R-ChIP-seq signal relative to input. **B.** BRD4 ChIP-seq signal of select loci  
585 from ChIP-seq data published in Liu, et al. (2013) (Liu et al., 2013) **C.** Quantification of  
586 R-ChIP-qPCR at loci shown in **B** after treatment with DMSO or 100 nM dBET6. **D.**  
587 Representative images and **E.** quantification of  $\gamma$ H2AX staining per nucleus in HeLa  
588 cells transfected with wild-type or WKKD mutant RNase H1 before being treated with  
589 100 nM dBET6 or 10  $\mu$ M EdU for 4 hours. **F.** Representative images and **G.**  
590 quantification of neutral single cell electrophoresis assay of HeLa cells transfected as in  
591 **E** before treatment with DMSO or 100 nM dBET6 for 6 hours. Student's t-test (two-  
592 tailed, unpaired) was performed on **E**. ANOVA was performed on **G**. Data represent the  
593 mean  $\pm$ SEM. \* $P < 0.05$ ; \*\* $P < 0.01$ ; \*\*\* $P < 0.001$ . Source data are provided as a Source  
594 Data file.

595

596 **Figure 5: RNAPII loss rescues TRCs caused by BET inhibition**

597 **A.** Depiction of experimental design. HeLa cells were treated with 250 nM Triptolide or  
598 100  $\mu$ M DRB for four hours before being washed out. Subsequently, cells were treated  
599 with 100 nM dBET6 for one hour before fixation. **B.** Representative images and **C.**  
600 quantification of  $\gamma$ H2AX staining per nucleus from HeLa cells treated as described in **A**.  
601 **D.** Representative images of western blots from HeLa cells stably induced with the  
602 expression construct shown above each column for 24 hours. **E.** Representative images  
603 of western blots from HeLa cells treated with 100 nM dBET6 for indicated times.

604 ANOVA was performed on **c**. Data represent the mean  $\pm$ SEM. \* $P < 0.05$ ; \*\* $P < 0.01$ ;  
605 \*\*\* $P < 0.001$ . Source data are provided as a Source Data file.

606

607 **Figure 6: Model depicting the role of BRD4 in the prevention of R-loop-dependent**  
608 **TRCs**

609 **A.** Representative images and **B** quantification of western blots from OCI-AML2 cells  
610 harvested at various time points following the labeled treatment. **C.** Representative  
611 images of western blots from wild-type MEF or KPR8 cells treated with JQ1. **D.**

612 Depiction of proposed model. In normal conditions, BRD4 interacts with CDK9 to ensure  
613 the efficient phosphorylation of Serine-2 on the tail of RNAPII to release from  
614 transcriptional pause and allow transcription elongation. When BRD4 is inhibited or  
615 degraded by JQ1 or dBET6 respectively, RNAPII is unable to release from  
616 transcriptional pause or undergo elongation. This results in the build-up of R-loops  
617 which lead to TRCs and subsequent DNA damage. For western blots, lysates were  
618 probed for the epitope indicated beside each panel. Source data are provided as a  
619 Source Data file.

620

621 **Figure S1: BET protein loss of function leads to spontaneous DNA damage.**

622 **A.** Representative images and **B.** quantification of  $\gamma$ H2AX staining per nucleus in HCT-  
623 116 cells treated with DMSO or 500 nM JQ1 for 16 hours. Student's t-test (two-tailed,  
624 unpaired) was performed on **B**. Data represent the mean  $\pm$ SEM. \* $P < 0.05$ ; \*\* $P < 0.01$ ;  
625 \*\*\* $P < 0.001$ . Source data are provided as a Source Data file.

626

627 **Figure S2: BET protein degradation leads to replication stress and S-phase-**  
628 **dependent DNA damage.**

629 **A.** Flow cytometry distribution of EdU in cells that positively stained for  $\gamma$ H2AX signaling.  
630 OCI-AML2 cells were treated with DMSO or dBET6 for 2 hours before fixation. **B.**  
631 Quantification of  $\gamma$ H2AX staining per nucleus in OCI-AML2 cells treated simultaneously  
632 with 100 nM dBET6 and 10  $\mu$ M EdU for 2 hours. Source data are provided as a Source  
633 Data file.

634

635 **Figure S3: The C-terminal domain of BRD4 is required to prevent transcription-**  
636 **replication conflicts.**

637 **A.** Representative western blot images of HeLa cells treated with the described siRNA  
638 for 72 hours. **B.** Snapgene files depicting the 2-vector iBRD4 system. Lentiviral,  
639 doxycycline-inducible BRD4 isoform A construct (left panel) and rtTA3 (right panel) were  
640 co-infected and selected by blasticidin and mCherry flow sorting to obtain a pure  
641 population. **C.** Representative western blot images of HeLa cells induced with  
642 doxycycline for 24 hours and then treated with increasing levels of dBET6 for 6 hours.  
643 **D.** Representative images of HeLa cells harboring BRD4 Isoform A construct induced  
644 with doxycycline for 24 hours before being treated with 100 nM dBET6 for 4 hours. **E.**  
645 Representative images of HeLa cells harboring BRD4 Isoform C construct induced with  
646 doxycycline for 24 hours before being treated with 100 nM dBET6 for 4 hours. For  
647 western blots, lysates are probed for the epitope as described beside each panel.  
648 Source data are provided as a Source Data file.

649

650 **Figure S4: BET inhibition leads to an increase in R-loop-dependent DNA damage**

651 **A.** Western blot image depicting immunoprecipitation of RNase H1 D210N to validate  
652 V5 specificity. HEK-293T cells were induced with RNaseH1-D210N-V5 before harvest  
653 and immunoprecipitated with an anti-V5 or anti-IgG antibody and compared to input. **B.**  
654 ChIP-qPCR signal for RNAPII $\psi$ S2 following treatment of HeLa cells with DMSO or  
655 dBET6 for 2 hours at loci described in Figure 4B. **C.** Comparison of RNA Pol II traveling  
656 ratios between DMSO and dBET6 treatment for genes at the SRSF2 locus based on  
657 RNAPII ChIP-qPCR. **D.** Western blot image confirming validation of wild-type or WKKD  
658 mutant RNaseH1-V5 constructs. **E.** Representative western blot images from HeLa  
659 cells treated with DMSO or dBET6 for 6 hours. **F.** Representative western blot images  
660 and **G.** quantification of HeLa cells with various siRNA knock downs and treated with  
661 dBET6. **H.** Representative western blot images of HeLa cells treated with dBET6 in  
662 combination with camptothecin or dexrazoxane. For western blots, lysates are probed  
663 for the epitope as described beside each panel. Source data are provided as a Source  
664 Data file.

665  
666 **Figure S5: RNAPII loss rescues TRCs caused by BET inhibition**

667 **A.** Western blot images of HeLa cells treated with DMSO or decreasing levels of  
668 triptolide for four hours: lysates probed for the epitope as described beside each panel.  
669 **B.** Western blot images of HeLa cells treated with DMSO or decreasing levels of DRB  
670 for four hours: lysates probed for the epitope as described beside each panel. **C.**  
671 Representative images and **D.** quantification of western blot images of HCT-116 cells  
672 treated with DMSO, 1  $\mu$ M triptolide, and/or 100 nM dBET6 as described for four hours

673 before harvest: lysates probed for the epitope described beside each panel. **E**.  
674 Representative images and **F**. quantification of western blots of HeLa cells treated with  
675 100 nM dBET6 for indicated times: lysates probed for the epitope described next to  
676 each panel. ANOVA was performed on **D**. Data represent the mean  $\pm$ SEM. \* $P < 0.05$ ;  
677 \*\* $P < 0.01$ ; \*\*\* $P < 0.001$ . Source data are provided as a Source Data file.

678 **METHODS**

679 **Cell Culture**

680 HeLa (ATCC), HEK-293T (ATCC), mouse embryonic fibroblast (MEF), and K-  
681 rasV12D-p53 deleted (KPR8) cells were cultured in Dulbecco's modified Eagle's  
682 medium (DMEM) (Genesee Scientific) supplemented with 10% fetal bovine serum  
683 (FBS) (Summerlin Scientific Products) and 1% penicillin/streptomycin (P/S) (Thermo  
684 Fisher Scientific). HCT-116 (Duke Cell Culture Facility-verified) cells were cultured in  
685 McCoy's 5A medium (Thermo Fisher Scientific) supplemented with 10% FBS and 1%  
686 P/S. OCI-AML2 cells were cultured in Roswell Park Memorial Institute 1640 medium  
687 (RPMI) (Thermo Fisher Scientific) supplemented with 10% FBS and 1% P/S. MEF and  
688 KPR8 cells were kind gift from Tyler Jacks.

689

690 **Antibodies and stains**

691 The following antibodies were used for western blot (WB), immunofluorescence  
692 (IF), or ChIP experiments: BRD4 N-terminus (1:1000WB, 1:1000IF, ab128874, Abcam);  
693 BRD2 (1:500WB, 5848S, Cell Signaling Technology); BRD3 (1:100WB, ab50818,  
694 Abcam); RNAPIIpS2 (1:1000WB, 1:50ChIP, 04-1571, EMD Millipore);  $\gamma$ H2AX  
695 (1:1000WB, 1:1000IF, 1:50ChIP, 9718S, Cell Signaling Technology);  $\alpha$ -Tubulin  
696 (1:1000WB, 2144S, Cell Signaling Technology); RPA2pS33 (1:500WB, ab211877,  
697 Abcam); cleaved PARP (1:1000WB, 5625, Cell Signaling Technology); BrdU (1:20IF,  
698 347580, BD Biosciences); BrdU (1:80IF, ab6326, Abcam); V5 (1:1000IF, 1:50ChIP,  
699 ab9116, Abcam); Total RNAPII (1:000WB, 1:50ChIP, ab817, Abcam); c-Myc  
700 (1:1000WB, 5605S, Cell Signaling Technology); Cleaved Caspase 3 (1:500WB, 9664S,



701 Cell Signaling Technology); SETX (1:500WB, ab220827, Abcam); SRSF1 (1:500WB,  
702 324600, Thermo Fisher Scientific); DHX9 (1:1000WB, PA519542, Thermo Fisher  
703 Scientific); HEXIM (1:1000WB, ab25388, Abcam); Top2a (1:1000WB, ab52934,  
704 Abcam); Top 2b (1:1000, ab72334, Abcam); XPF (1:1000WB, ab76948, Abcam); XPG  
705 (1:1000WB, ab224815, Abcam); Goat Anti-Rabbit IgG 800CW (1:6000WB, 926-32211,  
706 LI-COR Biosciences); Goat Anti-Mouse IgG 680RD (1:6000WB, 926-68070, LI-COR  
707 Biosciences); Goat Anti-Rat IgG 680LT (1:6000, 926-68029, LI-COR Biosciences); Goat  
708 Anti-Rabbit IgG Alexa Fluor 647nm (1:500IF, A211245, Life Technologies); Goat Anti-  
709 Rabbit IgG Alexa Fluor 555nm (1:500IF, A21428, Invitrogen); Goat Anti-Rabbit IgG  
710 Alexa Fluor 488nm (1:500IF, A11008, Life Technologies); Goat Anti-Mouse IgG Alexa  
711 Fluor 488 (1:500IF, A11001, Invitrogen); Goat Anti-Rat IgG Alexa Fluor 647 (1:500IF,  
712 A21247, Invitrogen).

713 DAPI (1:2000IF, Thermo Fisher Scientific) was used to stain nuclei. SYBR Gold  
714 (1X, Thermo Fisher Scientific) was used to stain single cell electrophoresis (comet)  
715 assay. Propidium Iodide (50 µg/mL, VWR) was used to stain nuclei for cell cycle  
716 analysis.

717

## 718 **Immunofluorescence**

719 Cells were grown on coverslips or in micro-chamber wells (Ibidi) overnight before  
720 induction or treatment. When the experiment was completed, cells were washed with  
721 ice cold PBS and fixed with 4% paraformaldehyde for 20 minutes at room temperature  
722 (RT). After fixation, cells were washed with PBS and then blocked in 5% goat serum  
723 and .25% Triton-X for 1 hour at RT, rocking. Following blocking, primary antibodies

724 were diluted in the same blocking buffer and incubated at 4°C overnight, rocking.  
725 Following incubation with primary antibody, cells were washed three times with PBS  
726 and stained with the appropriate secondary antibody diluted and DAPI in blocking buffer  
727 at RT for 1 hour, rocking. After incubation with secondary antibody, cells were washed  
728 three times with PBS. In the case of cells grown on coverslips, cells were mounted on  
729 slides using Prolong Gold (Thermo Fisher Scientific) before imaging. Cells grown in  
730 micro-chamber wells were left in PBS before immediate imaging. Immunofluorescence  
731 images were taken either on a Zeiss Axio Observer or EVOS microscope using a 40X  
732 objective. Quantification of  $\gamma$ H2AX foci was done using the speckle counting pipeline in  
733 CellProfiler. All images within a single experiment were fed into the same pipeline and  
734 speckles (foci) were counted in an unbiased fashion using the automated program.  
735  $\gamma$ H2AX signal is defined as the multiplication of foci count of a nucleus with the mean  
736 integrated intensity of the foci within that nucleus.

737

### 738 **Western Blotting**

739 Whole cell lysates were prepared with a whole cell lysis buffer (50mM Tris-HCl  
740 pH 8.0, 10mM EDTA, 1% SDS) with protease and phosphatase inhibitors (Thermo,  
741 78440) added fresh. Lysates were then sonicated using a QSonica Q700 sonicator for  
742 two minutes with an amplitude of 35. After sonication, protein concentrations were  
743 determined using BCA reagents (Pierce), compared to protein assay standards  
744 (Thermo Fischer Scientific), and scanned using a Spectramax i3x. Equivalent amounts  
745 of protein were resolved by SDS-PAGE gels and transferred to nitrocellulose  
746 membranes. Membranes were then blocked with a 1:1 solution of PBS and Odyssey

747 Blocking Buffer (LI-COR Biosciences) at RT for one hour, rocking. Primary antibodies  
748 were then diluted in the blocking buffer as described above and incubated with the  
749 membranes at 4°C overnight. Membranes were then washed three times with 0.2%  
750 Tween-20 in PBS (PBS-T). The appropriate secondary antibodies were also diluted in  
751 the blocking buffer and incubated with the membranes at RT for one hour. Membranes  
752 were then washed with PBS-T three times and scanned using a LI-COR Odyssey  
753 scanner. Quantification and normalization of western blot signal was done using the LI-  
754 COR software, Image Studio.

755

### 756 **Single Cell Electrophoresis (Comet) Assay**

757 Neutral comet assays were performed using the CometAssay Reagent Kit  
758 (Trevigen) according to the manufacturer's protocol. Briefly, cells were washed in ice  
759 cold PBS, scraped from the plate, mixed with low melt agarose and spread onto  
760 supplied microscope slides in the dark. The agarose was gelled at 4°C for 30 minutes  
761 before being submerged in the supplied lysis buffer 4°C overnight in the dark. Slides  
762 were then incubated with chilled neutral electrophoresis buffer at 4°C for 30 minutes  
763 before being subjected to 21V for 45 minutes. Slides were submerged with DNA  
764 precipitation at RT for 30 minutes and then 70% ethanol at RT for 30 minutes. Slides  
765 were then dried and stained with 1X SYBR gold as described above. Comets were  
766 imaged on a Zeiss Axio Observer using a 10X objective. Comets were quantified using  
767 the comet pipeline from CellProfiler. All images within a single experiment were fed into  
768 the same pipeline and comets were quantified in an unbiased fashion using the

769 automated program. Extent Tail moment is defined as Tail DNA % multiplied with the  
770 length of the comet tail.

771

## 772 **Transfections**

773 For RNA interference, cells were incubated with Thermo Fisher *Silencer*® Select  
774 Pre-designed or Dharmacon ON-TARGETplus siRNAs for BRD2 (Thermo, s12071),  
775 BRD3 (Thermo, s15545), BRD4 (Thermo, 23902), HEXIM (Thermo, s20843), Top2a  
776 (Dharmacon, L-004239-00-0005), Top2b (Dharmacon, L-004240-00-0005), XPF  
777 (Dharmacon, L-019946-00-0005), XPG (Dharmacon, L-006626-00-0005), or negative  
778 control (Thermo, 4390846). Transfections were done with Lipofectamine RNAiMAX  
779 transfection reagent (Invitrogen) according to the manufacturer's protocol.

780 For transfection of RNase H1 constructs, cells were transfected with WT RNase  
781 H1 (Addgene, 111906), the D210N mutant (Addgene, 111904), or WKKD mutant  
782 (Addgene, 111904) which were a gift from Xiang-Dong Fu and previously described(L.  
783 Chen et al., 2017). 750 fmol of plasmid was incubated with a 6:1 ratio of Xtremegene  
784 HP transfection reagent at RT for 20 minutes in 1 mL of Opti-mem media. The  
785 transfection mixture was then added dropwise to a 10cm dish containing  
786 Cells at 70% confluence for 24 hours. Cells were then selected with 100 µg/mL  
787 hygromycin for 24 hours before fixing (for immunofluorescence experiments) or  
788 immediately fixed (for ChIP experiments).

789

## 790 **DNA Fiber Analysis**

791 DNA fiber analysis was performed as previously described(Quinet et al., 2017).  
792 Briefly, cells were plated at  $1 \times 10^5$  cells per well in a 6-well plate and incubated  
793 overnight. Cells were then pulsed with the appropriate thymidine analog and treated as  
794 shown in **Figure 2G**. Cells were then washed with PBS and placed on Superfrost Plus  
795 Microscope slides and lysed. Following lysis, slides were tilted by raising the edge of the  
796 slide 2.2 cm to allow DNA fibers to stretch along the slide and left to dry. DNA was then  
797 fixed in 3:1 methanol:acetic acid, dried, and washed in PBS before HCl denaturation of  
798 the DNA. The slides were then blocked in 5% BSA before being stained with primary  
799 antibodies to detect IdU (mouse anti-BrdU) or CldU (rat anti BrdU). Slides were then  
800 stained with the appropriate secondary antibodies before imaging. Images were taken  
801 on a Leica SP5 microscope using a 100X objective. ImageJ was used to measure  
802 lengths of fibers.

803

#### 804 **Plasmid Construction**

805 The iBRD4 plasmids were constructed using the pCW57-GFP-2A-MCS  
806 backbone (Addgene, 71783), which was a gift from Adam Karpf and previously  
807 described(Barger et al., 2019). Gibson assembly was used to insert either mCherry-2A-  
808 Flag-BRD4 isoform A or isoform C into the backbone in place of the TurboGFP-P2A-  
809 hPGK promoter-PuroR-T2A-rTetR region. The C-terminal domain was deleted from  
810 isoform A using PCR ( $A\Delta$ CTD). The extra-terminal domain was deleted from isoform C  
811 using PCR ( $C\Delta$ ET). Sanger sequencing was performed to verify the cloning products.

812

#### 813 **Small Molecule Inhibitors**

814           The BET protein degrader dBET6 was a gift from Nathanael Gray and previously  
815 described(Winter et al., 2017). dBET6 was used at a concentration of 100 nM in all  
816 experiments except those involving the iBRD4 system, in which it was used at 10 nM.  
817 The BET bromodomain inhibitor JQ1 was a gift from James Bradner and previously  
818 described(Filippakopoulos et al., 2010b). JQ1 was used at a concentration of 500 nM  
819 for all experiments. The CDK9 inhibitor DRB (Cayman Chemical Company, 10010302)  
820 was used at a concentration of 100  $\mu$ M for all experiments. The TFIIH inhibitor triptolide  
821 (EMD Millipore, 645900) was used at a concentration of 250 nM (HeLa) or 1  $\mu$ M (HCT-  
822 116). The proteasome inhibitor, MG-132 (Selleck Chemicals) was used at a  
823 concentration of 10  $\mu$ M. The topoisomerase I inhibitor, camptothecin (Selleck  
824 Chemicals), was used at a concentration of 10  $\mu$ M. The topoisomerase II inhibitor,  
825 dexrazoxane (Selleck Chemicals), was used at a concentration of 50  $\mu$ M. The BET  
826 bromodomain inhibitors OTX015 (Selleck Chemicals), ABBV-075 (Selleck Chemicals),  
827 ABBV-744 (Selleck Chemicals), and PLX51107 (Selleck Chemicals) where used at 2  
828  $\mu$ M, 20 nM, 50 nM, and 2  $\mu$ M, respectively.

829

### 830 **EdU Detection**

831           EdU detection was done according using the EdU-Click Chemistry 488 kit  
832 (Sigma-Aldrich, BCK-EDU488) according to manufacturer's instructions. In brief, cells  
833 were pulsed with 10  $\mu$ M EdU alongside simultaneous treatment with DMSO or dBET6.  
834 Cells were then fixed, washed with PBS, and blocked as described above. Cells were  
835 then incubated at RT for 30 minutes in the click chemistry cocktail. Following incubation,

836 cells were washed three times with PBS. After the click chemistry was completed, cells  
837 were further process according to the immunofluorescence methods described above.

838

### 839 **Flow Cytometry and Cell Cycle Analysis**

840 For cell cycle analysis, cells were trypsinized and washed with ice cold PBS.

841 Cells were then fixed with 70% ethanol at 4°C for 30 minutes. Cells were then washed

842 with PBS twice before being incubated with 100 µg/mL RNase A and 50 µg/mL

843 propidium iodide overnight at 4°C. Cells were then quantified by flow cytometry for DNA

844 content on a BD FACSCanto II machine. For analysis, flow results were entered into the

845 univariate cell cycle modeling in FlowJo for the distribution of cell cycle. Analysis of sub-

846 G<sub>1</sub> populations were done as previously described(Riccardi and Nicoletti, 2006).

847 For EdU and γH2AX flow experiments, cells were fixed and stained according to

848 the EdU click chemistry and immunofluorescence methods described above. Cells were

849 then quantified for EdU and γH2AX signal on a BD FACSCanto II machine. FlowJo was

850 then used to generate the figures. Cells that were not pulsed with EdU were used as a

851 negative control for EdU click chemistry. Cells not stained with γH2AX primary antibody

852 were used as a negative control for γH2AX staining.

853

### 854 **Chromatin Immunoprecipitation Followed by Next Generation Sequencing (ChIP- 855 seq)**

856 Wild-type HeLa cells (ChIP) or cells transfected with RNase H1 D210N (R-ChIP)

857 were both prepared for qPCR or sequencing using the SimpleChIP® Plus Sonication

858 Chromatin IP Kit according to the manufacturer's instructions. In brief, cells were

859 washed with ice cold PBS and then fixed with 1% formaldehyde in PBS at RT for 13  
860 minutes. The fixation reaction was then halted using a 1X Glycine solution. Cells were  
861 then scraped from the plates and pelleted. Cells were then incubated with 1X ChIP  
862 sonication cell lysis buffer plus protease inhibitors (PIC) on ice for 10 minutes. Cells  
863 were then pelleted and the previous step was repeated. Nuclei were then pelleted and  
864 resuspended in ice cold ChIP Sonication Nuclear Lysis buffer with PIC and incubated  
865 on ice for 10 minutes. Lysates were then fragmented by sonication with a QSonica  
866 Q700 at 4°C for 15 minutes ON-time with a 15s on, 45s off program. After sonication, a  
867 sample for 2% input was removed. 10 µg of lysates were then incubated with a ChIP  
868 grade antibody at 4°C overnight. 30 µL of magnetic beads were then added to the  
869 mixture and incubated at 4°C for two hours before going through a series of salt  
870 washes. Chromatin was then eluted from the magnetic beads in the elution buffer at  
871 65°C for 30 minutes while vortexing. The supernatant was removed and treated with  
872 RNase A followed by Proteinase K. ChIP DNA was then purified using the supplied  
873 columns. Library preparation, Next Generation Sequencing, and analysis was  
874 performed by GeneWiz to determine the level of ChIP-seq or R-ChIP-seq signal  
875 following DMSO or dBET6 treatment for two hours. Log2 ratio normalization to input  
876 was done using the bamCompare function of deepTools with default inputs.

877

### 878 **Chromatin Immunoprecipitation Followed by qPCR (ChIP-qPCR)**

879 DNA for ChIP-qPCR and R-ChIP-qPCR was prepared the same as as  
880 described for ChIP-seq experiments. Equal volumes of DNA template were subjected to  
881 qPCR with qPCR primers designed against the transcription start sites, exons, introns,



882 and transcription termination sites of candidate genes using iTaq Universal SYBR  
883 Green Supermix. Samples were normalized to input to determine the relative amounts  
884 of ChIP and R-ChIP signal after DMSO or dBET6 treatment for two hours. Primer  
885 sequences can be found in the Source File. RNAPII travel ratios were calculated as  
886 previously described(Winter et al., 2017).

887

888

889 **ACKNOWLEDGEMENTS**

890 We thank Xiang-Dong Fu for providing the RNase H1 constructs, Adam Karpf for

891 providing the pCW57 construct, Nathanael Gray for providing dBET6, James Bradner

892 for providing JQ1, and Tyler Jacks for providing MEF and KPR8 cells. We also thank

893 Duke MSTP for providing funding for D.E. to conduct this work. The work was funded by

894 Burroughs Wellcome Career Award for Medical Scientists and American Cancer Society

895 Research Scholar Grant 133394-RSG-19-030-01-DMC to S.R.F.

896

897 **AUTHOR CONTRIBUTIONS**

898 D.E and S.R.F. designed the project. D.E., R.M., J.P.T., J-H.P., E.B-S., Jie L., and Jin.

899 L. conducted the experiments. D.E., R.M., Jie L., and S.R.F. analyzed the data. D.E.

900 and S.R.F. wrote the manuscript.

901 **REFERENCES**

902

903 Aguilera, A., Gómez-González, B., 2017. DNA–RNA hybrids: the risks of DNA breakage  
904 during transcription. *Nat Struct Mol Biol* 24, 439–443. doi:10.1038/nsmb.3395

905 Asangani, I.A., Dommeti, V.L., Wang, X., Malik, R., Cieslik, M., Yang, R., Escara-Wilke,  
906 J., Wilder-Romans, K., Dhanireddy, S., Engelke, C., Iyer, M.K., Jing, X., Wu, Y.-M.,  
907 Cao, X., Qin, Z.S., Wang, S., Feng, F.Y., Chinnaiyan, A.M., 2014. Therapeutic  
908 targeting of BET bromodomain proteins in castration-resistant prostate cancer.  
909 *Nature* 510, 278–282. doi:10.1038/nature13229

910 Baranello, L., Wojtowicz, D., Cui, K., Devaiah, B.N., Chung, H.-J., Chan-Salis, K.Y.,  
911 Guha, R., Wilson, K., Zhang, X., Zhang, H., Piotrowski, J., Thomas, C.J., Singer,  
912 D.S., Pugh, B.F., Pommier, Y., Przytycka, T.M., Kouzine, F., Lewis, B.A., Zhao, K.,  
913 Levens, D., 2016. RNA Polymerase II Regulates Topoisomerase 1 Activity to Favor  
914 Efficient Transcription. *Cell* 165, 357–371. doi:10.1016/j.cell.2016.02.036

915 Barger, C.J., Branick, C., Chee, L., Karpf, A.R., 2019. Pan-Cancer Analyses Reveal  
916 Genomic Features of FOXM1 Overexpression in Cancer. *Cancers (Basel)* 11.  
917 doi:10.3390/cancers11020251

918 Baumli, S., Hole, A.J., Wang, L.-Z., Noble, M.E.M., Endicott, J.A., 2012. The CDK9 Tail  
919 Determines the Reaction Pathway of Positive Transcription Elongation Factor b.  
920 *Structure/Folding and Design* 20, 1788–1795. doi:10.1016/j.str.2012.08.011

921 Bermejo, R., Lai, M.S., Foiani, M., 2012. Preventing replication stress to maintain  
922 genome stability: resolving conflicts between replication and transcription. *Mol Cell*  
923 45, 710–718. doi:10.1016/j.molcel.2012.03.001

924 Bisgrove, D.A., Mahmoudi, T., Henklein, P., Verdin, E., 2007. Conserved P-TEFb-  
925 interacting domain of BRD4 inhibits HIV transcription. *Proc. Natl. Acad. Sci. U.S.A.*  
926 104, 13690–13695. doi:10.1073/pnas.0705053104

927 Blackford, A.N., Jackson, S.P., 2017. ATM, ATR, and DNA-PK: The Trinity at the Heart  
928 of the DNA Damage Response. *Mol Cell* 66, 801–817.  
929 doi:10.1016/j.molcel.2017.05.015

- 930 Bolden, J.E., Tasdemir, N., Dow, L.E., van Es, J.H., Wilkinson, J.E., Zhao, Z., Clevers,  
931 H., Lowe, S.W., 2014. Inducible in vivo silencing of Brd4 identifies potential toxicities  
932 of sustained BET protein inhibition. *Cell Reports* 8, 1919–1929.  
933 doi:10.1016/j.celrep.2014.08.025
- 934 Bowry, A., Piberger, A.L., Rojas, P., Saponaro, M., Petermann, E., 2018. BET Inhibition  
935 Induces HEXIM1- and RAD51-Dependent Conflicts between Transcription and  
936 Replication. *Cell Reports* 25, 2061–2069.e4. doi:10.1016/j.celrep.2018.10.079
- 937 Canela, A., Maman, Y., Huang, S.-Y.N., Wutz, G., Tang, W., Zagnoli-Vieira, G., Callen,  
938 E., Wong, N., Day, A., Peters, J.-M., Caldecott, K.W., Pommier, Y., Nussenzweig,  
939 A., 2019. Topoisomerase II-Induced Chromosome Breakage and Translocation Is  
940 Determined by Chromosome Architecture and Transcriptional Activity. *Mol Cell* 75,  
941 252–266.e8. doi:10.1016/j.molcel.2019.04.030
- 942 Chaudhuri, J., Alt, F.W., 2004. Class-switch recombination: interplay of transcription,  
943 DNA deamination and DNA repair. *Nat. Rev. Immunol.* 4, 541–552.  
944 doi:10.1038/nri1395
- 945 Chen, J.-Y., Zhang, X., Fu, X.-D., Chen, L., 2019. R-ChIP for genome-wide mapping of  
946 R-loops by using catalytically inactive RNASEH1. *Nat Protoc* 46, 115.  
947 doi:10.1038/s41596-019-0154-6
- 948 Chen, L., Chen, J.-Y., Zhang, X., Gu, Y., Xiao, R., Shao, C., Tang, P., Qian, H., Luo, D.,  
949 Li, H., Zhou, Y., Zhang, D.-E., Fu, X.-D., 2017. R-ChIP Using Inactive RNase H  
950 Reveals Dynamic Coupling of R-loops with Transcriptional Pausing at Gene  
951 Promoters. *Mol Cell*. doi:10.1016/j.molcel.2017.10.008
- 952 Chen, R., Yik, J.H.N., Lew, Q.J., Chao, S.-H., 2014. Brd4 and HEXIM1: multiple roles in  
953 P-TEFb regulation and cancer. *Biomed Res Int* 2014, 232870–11.  
954 doi:10.1155/2014/232870
- 955 Cheung, K.L., Zhang, F., Jaganathan, A., Sharma, R., Zhang, Q., Konuma, T., Shen, T.,  
956 Lee, J.-Y., Ren, C., Chen, C.-H., Lu, G., Olson, M.R., Zhang, W., Kaplan, M.H.,  
957 Littman, D.R., Walsh, M.J., Xiong, H., Zeng, L., Zhou, M.-M., 2017. Distinct Roles of  
958 Brd2 and Brd4 in Potentiating the Transcriptional Program for Th17 Cell  
959 Differentiation. *Mol Cell* 65, 1068–1080.e5. doi:10.1016/j.molcel.2016.12.022

- 960 Cimprich, K.A., Cortez, D., 2008. ATR: an essential regulator of genome integrity. *Nat.*  
961 *Rev. Mol. Cell Biol.* 9, 616–627. doi:10.1038/nrm2450
- 962 Costantino, L., Koshland, D., 2018. Genome-wide Map of R-Loop-Induced Damage  
963 Reveals How a Subset of R-Loops Contributes to Genomic Instability. *Mol Cell* 71,  
964 487–497.e3. doi:10.1016/j.molcel.2018.06.037
- 965 Crossley, M.P., Bocek, M., Cimprich, K.A., 2019. R-Loops as Cellular Regulators and  
966 Genomic Threats. *Mol Cell* 73, 398–411. doi:10.1016/j.molcel.2019.01.024
- 967 Dawson, M.A., Prinjha, R.K., Dittmann, A., Giotopoulos, G., Bantscheff, M., Chan, W.-I.,  
968 Robson, S.C., Chung, C.-W., Hopf, C., Savitski, M.M., Huthmacher, C., Gudgin, E.,  
969 Lugo, D., Beinke, S., Chapman, T.D., Roberts, E.J., Soden, P.E., Auger, K.R.,  
970 Mirguet, O., Doehner, K., Delwel, R., Burnett, A.K., Jeffrey, P., Drewes, G., Lee, K.,  
971 Huntly, B.J.P., Kouzarides, T., 2011. Inhibition of BET recruitment to chromatin as  
972 an effective treatment for MLL-fusion leukaemia. *Nature* 478, 529–533.  
973 doi:10.1038/nature10509
- 974 Delmore, J.E., Issa, G.C., Lemieux, M.E., Rahl, P.B., Shi, J., Jacobs, H.M., Kastiris, E.,  
975 Gilpatrick, T., Paranal, R.M., Qi, J., Chesi, M., Schinzel, A.C., McKeown, M.R.,  
976 Heffernan, T.P., Vakoc, C.R., Bergsagel, P.L., Ghobrial, I.M., Richardson, P.G.,  
977 Young, R.A., Hahn, W.C., Anderson, K.C., Kung, A.L., Bradner, J.E., Mitsiades,  
978 C.S., 2011. BET bromodomain inhibition as a therapeutic strategy to target c-Myc.  
979 *Cell* 146, 904–917. doi:10.1016/j.cell.2011.08.017
- 980 Drolet, M., Phoenix, P., Menzel, R., Massé, E., Liu, L.F., Crouch, R.J., 1995.  
981 Overexpression of RNase H partially complements the growth defect of an  
982 *Escherichia coli* delta topA mutant: R-loop formation is a major problem in the  
983 absence of DNA topoisomerase I. *Proc. Natl. Acad. Sci. U.S.A.* 92, 3526–3530.  
984 doi:10.1073/pnas.92.8.3526
- 985 Faivre, E.J., McDaniel, K.F., Albert, D.H., Mantena, S.R., Plotnik, J.P., Wilcox, D.,  
986 Zhang, L., Bui, M.H., Sheppard, G.S., Wang, L., Sehgal, V., Lin, X., Huang, X., Lu,  
987 X., Uziel, T., Hessler, P., Lam, L.T., Bellin, R.J., Mehta, G., Fidanze, S., Pratt, J.K.,  
988 Liu, D., Hasvold, L.A., Sun, C., Panchal, S.C., Nicolette, J.J., Fossey, S.L., Park,  
989 C.H., Longenecker, K., Bigelow, L., Torrent, M., Rosenberg, S.H., Kati, W.M., Shen,  
990 Y., 2020. Selective inhibition of the BD2 bromodomain of BET proteins in prostate  
991 cancer. *Nature* 578, 306–310. doi:10.1038/s41586-020-1930-8

- 992 Filippakopoulos, P., Picaud, S., Mangos, M., Keates, T., Lambert, J.-P., Barsyte-  
993 Lovejoy, D., Felletar, I., Volkmer, R., Müller, S., Pawson, T., Gingras, A.-C.,  
994 Arrowsmith, C.H., Knapp, S., 2012. Histone recognition and large-scale structural  
995 analysis of the human bromodomain family. *Cell* 149, 214–231.  
996 doi:10.1016/j.cell.2012.02.013
- 997 Filippakopoulos, P., Qi, J., Picaud, S., Shen, Y., Smith, W.B., Fedorov, O., Morse, E.M.,  
998 Keates, T., Hickman, T.T., Felletar, I., Philpott, M., Munro, S., McKeown, M.R.,  
999 Wang, Y., Christie, A.L., West, N., Cameron, M.J., Schwartz, B., Heightman, T.D.,  
1000 La Thangue, N., French, C.A., Wiest, O., Kung, A.L., Knapp, S., Bradner, J.E.,  
1001 2010a. Selective inhibition of BET bromodomains. *Nature* 468, 1067–1073.  
1002 doi:10.1038/nature09504
- 1003 Filippakopoulos, P., Qi, J., Picaud, S., Shen, Y., Smith, W.B., Fedorov, O., Morse, E.M.,  
1004 Keates, T., Hickman, T.T., Felletar, I., Philpott, M., Munro, S., McKeown, M.R.,  
1005 Wang, Y., Christie, A.L., West, N., Cameron, M.J., Schwartz, B., Heightman, T.D.,  
1006 La Thangue, N., French, C.A., Wiest, O., Kung, A.L., Knapp, S., Bradner, J.E.,  
1007 2010b. Selective inhibition of BET bromodomains. *Nature* 468, 1067–1073.  
1008 doi:10.1038/nature09504
- 1009 Fiskus, W., Sharma, S., Qi, J., Valenta, J.A., Schaub, L.J., Shah, B., Peth, K., Portier,  
1010 B.P., Rodriguez, M., Devaraj, S.G.T., Zhan, M., Sheng, J., Iyer, S.P., Bradner, J.E.,  
1011 Bhalla, K.N., 2014. Highly active combination of BRD4 antagonist and histone  
1012 deacetylase inhibitor against human acute myelogenous leukemia cells. *Mol.*  
1013 *Cancer Ther.* 13, 1142–1154. doi:10.1158/1535-7163.MCT-13-0770
- 1014 Floyd, S.R., Pacold, M.E., Huang, Q., Clarke, S.M., Lam, F.C., Cannell, I.G., Bryson,  
1015 B.D., Rameseder, J., Lee, M.J., Blake, E.J., Fydrych, A., Ho, R., Greenberger, B.A.,  
1016 Chen, G.C., Maffa, A., Del Rosario, A.M., Root, D.E., Carpenter, A.E., Hahn, W.C.,  
1017 Sabatini, D.M., Chen, C.C., White, F.M., Bradner, J.E., Yaffe, M.B., 2013a. The  
1018 bromodomain protein Brd4 insulates chromatin from DNA damage signalling. *Nature*  
1019 498, 246–250. doi:10.1038/nature12147
- 1020 Floyd, S.R., Pacold, M.E., Huang, Q., Clarke, S.M., Lam, F.C., Cannell, I.G., Bryson,  
1021 B.D., Rameseder, J., Lee, M.J., Blake, E.J., Fydrych, A., Ho, R., Greenberger, B.A.,  
1022 Chen, G.C., Maffa, A., Del Rosario, A.M., Root, D.E., Carpenter, A.E., Hahn, W.C.,  
1023 Sabatini, D.M., Chen, C.C., White, F.M., Bradner, J.E., Yaffe, M.B., 2013b. The  
1024 bromodomain protein Brd4 insulates chromatin from DNA damage signalling. *Nature*  
1025 498, 246–250. doi:10.1038/nature12147

- 1026 Fowler, T., Ghatak, P., Price, D.H., Conaway, R., Conaway, J., Chiang, C.-M., Bradner,  
1027 J.E., Shilatifard, A., Roy, A.L., 2014. Regulation of MYC expression and differential  
1028 JQ1 sensitivity in cancer cells. PLoS ONE 9, e87003.  
1029 doi:10.1371/journal.pone.0087003
- 1030 Gaillard, H., Aguilera, A., 2016. Transcription as a Threat to Genome Integrity. Annu.  
1031 Rev. Biochem. 85, 291–317. doi:10.1146/annurev-biochem-060815-014908
- 1032 Gan, W., Guan, Z., Liu, J., Gui, T., Shen, K., Manley, J.L., Li, X., 2011. R-loop-mediated  
1033 genomic instability is caused by impairment of replication fork progression. Genes  
1034 Dev. 25, 2041–2056. doi:10.1101/gad.17010011
- 1035 Garcia-Muse, T., Aguilera, A., 2019. R Loops: From Physiological to Pathological Roles.  
1036 Cell 179, 604–618. doi:10.1016/j.cell.2019.08.055
- 1037 Garcia-Muse, T., Aguilera, A., 2016. Transcription-replication conflicts: how they occur  
1038 and how they are resolved. Nat. Rev. Mol. Cell Biol. 17, 553–563.  
1039 doi:10.1038/nrm.2016.88
- 1040 Grunseich, C., Wang, I.X., Watts, J.A., Burdick, J.T., Guber, R.D., Zhu, Z., Bruzel, A.,  
1041 Lanman, T., Chen, K., Schindler, A.B., Edwards, N., Ray-Chaudhury, A., Yao, J.,  
1042 Lehky, T., Piszczek, G., Crain, B., Fischbeck, K.H., Cheung, V.G., 2018. Senataxin  
1043 Mutation Reveals How R-Loops Promote Transcription by Blocking DNA  
1044 Methylation at Gene Promoters. Mol Cell 69, 426–437.e7.  
1045 doi:10.1016/j.molcel.2017.12.030
- 1046 Haberle, V., Stark, A., 2018. Eukaryotic core promoters and the functional basis of  
1047 transcription initiation. Nature Publishing Group 19, 621–637. doi:10.1038/s41580-  
1048 018-0028-8
- 1049 Hage, El, A., French, S.L., Beyer, A.L., Tollervey, D., 2010. Loss of Topoisomerase I  
1050 leads to R-loop-mediated transcriptional blocks during ribosomal RNA synthesis.  
1051 Genes Dev. 24, 1546–1558. doi:10.1101/gad.573310
- 1052 Hamperl, S., Bocek, M.J., Saldivar, J.C., Swigut, T., Cimprich, K.A., 2017. Transcription-  
1053 Replication Conflict Orientation Modulates R-Loop Levels and Activates Distinct  
1054 DNA Damage Responses. Cell 170, 774–786.e19. doi:10.1016/j.cell.2017.07.043



- 1055 Hamperl, S., Cimprich, K.A., 2016. Conflict Resolution in the Genome: How  
1056 Transcription and Replication Make It Work 1–13. doi:10.1016/j.cell.2016.09.053
- 1057 Hanahan, D., Weinberg, R.A., 2011. Hallmarks of cancer: the next generation. *Cell* 144,  
1058 646–674. doi:10.1016/j.cell.2011.02.013
- 1059 Houzelstein, D., Bullock, S.L., Lynch, D.E., Grigorieva, E.F., Wilson, V.A., Beddington,  
1060 R.S.P., 2002. Growth and early postimplantation defects in mice deficient for the  
1061 bromodomain-containing protein Brd4. *Mol. Cell. Biol.* 22, 3794–3802.  
1062 doi:10.1128/MCB.22.11.3794-3802.2002
- 1063 Hsu, S.C., Gilgenast, T.G., Bartman, C.R., Edwards, C.R., Stonestrom, A.J., Huang, P.,  
1064 Emerson, D.J., Evans, P., Werner, M.T., Keller, C.A., Giardine, B., Hardison, R.C.,  
1065 Raj, A., Phillips-Cremins, J.E., Blobel, G.A., 2017. The BET Protein BRD2  
1066 Cooperates with CTCF to Enforce Transcriptional and Architectural Boundaries. *Mol*  
1067 *Cell* 66, 102–116.e7. doi:10.1016/j.molcel.2017.02.027
- 1068 Itzen, F., Greifenberg, A.K., Bösken, C.A., Geyer, M., 2014. Brd4 activates P-TEFb for  
1069 RNA polymerase II CTD phosphorylation. *Nucleic Acids Res* 42, 7577–7590.  
1070 doi:10.1093/nar/gku449
- 1071 Jang, M.K., Mochizuki, K., Zhou, M., Jeong, H.-S., Brady, J.N., Ozato, K., 2005. The  
1072 Bromodomain Protein Brd4 Is a Positive Regulatory Component of P-TEFb and  
1073 Stimulates RNA Polymerase II-Dependent Transcription. *Mol Cell* 19, 523–534.  
1074 doi:10.1016/j.molcel.2005.06.027
- 1075 Kanno, T., Kanno, Y., LeRoy, G., Campos, E., Sun, H.-W., Brooks, S.R., Vahedi, G.,  
1076 Heightman, T.D., Garcia, B.A., Reinberg, D., Siebenlist, U., O'Shea, J.J., Ozato, K.,  
1077 2014. BRD4 assists elongation of both coding and enhancer RNAs by interacting  
1078 with acetylated histones. *Nat Struct Mol Biol* 21, 1047–1057.  
1079 doi:10.1038/nsmb.2912
- 1080 Kim, J.J., Lee, S.Y., Gong, F., Battenhouse, A.M., Boutz, D.R., Bashyal, A., Refvik,  
1081 S.T., Chiang, C.-M., Xhemalce, B., Paull, T.T., Brodbelt, J.S., Marcotte, E.M., Miller,  
1082 K.M., 2019. Systematic bromodomain protein screens identify homologous  
1083 recombination and R-loop suppression pathways involved in genome integrity.  
1084 *Genes Dev.* doi:10.1101/gad.331231.119

- 1085 Komarnitsky, P., Cho, E.J., Buratowski, S., 2000. Different phosphorylated forms of  
1086 RNA polymerase II and associated mRNA processing factors during transcription.  
1087 *Genes Dev.* 14, 2452–2460. doi:10.1101/gad.824700
- 1088 Kotsantis, P., Silva, L.M., Irmischer, S., Jones, R.M., Folkes, L., Gromak, N., Petermann,  
1089 E., 2016a. Increased global transcription activity as a mechanism of replication  
1090 stress in cancer. *Nat Commun* 7, 13087. doi:10.1038/ncomms13087
- 1091 Kotsantis, P., Silva, L.M., Irmischer, S., Jones, R.M., Folkes, L., Gromak, N., Petermann,  
1092 E., 2016b. Increased global transcription activity as a mechanism of replication  
1093 stress in cancer. *Nat Commun* 7, 13087. doi:10.1038/ncomms13087
- 1094 Krueger, B.J., Varzavand, K., Cooper, J.J., Price, D.H., 2010. The mechanism of  
1095 release of P-TEFb and HEXIM1 from the 7SK snRNP by viral and cellular activators  
1096 includes a conformational change in 7SK. *PLoS ONE* 5, e12335.  
1097 doi:10.1371/journal.pone.0012335
- 1098 LeRoy, G., Rickards, B., Flint, S.J., 2008. The double bromodomain proteins Brd2 and  
1099 Brd3 couple histone acetylation to transcription. *Mol Cell* 30, 51–60.  
1100 doi:10.1016/j.molcel.2008.01.018
- 1101 Li, X., Manley, J.L., 2005. Inactivation of the SR protein splicing factor ASF/SF2 results  
1102 in genomic instability. *Cell* 122, 365–378. doi:10.1016/j.cell.2005.06.008
- 1103 Lin, C.Y., Lovén, J., Rahl, P.B., Paranal, R.M., Burge, C.B., Bradner, J.E., Lee, T.I.,  
1104 Young, R.A., 2012. Transcriptional amplification in tumor cells with elevated c-Myc.  
1105 *Cell* 151, 56–67. doi:10.1016/j.cell.2012.08.026
- 1106 Liu, W., Ma, Q., Wong, K., Li, W., Ohgi, K., Zhang, J., Aggarwal, A., Rosenfeld, M.G.,  
1107 2013. Brd4 and JMJD6-associated anti-pause enhancers in regulation of  
1108 transcriptional pause release. *Cell* 155, 1581–1595. doi:10.1016/j.cell.2013.10.056
- 1109 Maruyama, T., Farina, A., Dey, A., Cheong, J., Bermudez, V.P., Tamura, T., Sciortino,  
1110 S., Shuman, J., Hurwitz, J., Ozato, K., 2002a. A Mammalian bromodomain protein,  
1111 brd4, interacts with replication factor C and inhibits progression to S phase. *Mol.*  
1112 *Cell. Biol.* 22, 6509–6520. doi:10.1128/MCB.22.18.6509-6520.2002

- 1113 Maruyama, T., Farina, A., Dey, A., Cheong, J., Bermudez, V.P., Tamura, T., Sciortino,  
1114 S., Shuman, J., Hurwitz, J., Ozato, K., 2002b. A Mammalian bromodomain protein,  
1115 brd4, interacts with replication factor C and inhibits progression to S phase. *Mol.*  
1116 *Cell. Biol.* 22, 6509–6520. doi:10.1128/mcb.22.18.6509-6520.2002
- 1117 Massé, E., Phoenix, P., Drolet, M., 1997. DNA topoisomerases regulate R-loop  
1118 formation during transcription of the *rrnB* operon in *Escherichia coli*. *J Biol Chem*  
1119 272, 12816–12823. doi:10.1074/jbc.272.19.12816
- 1120 Matos, D.A., Zhang, J.-M., Ouyang, J., Nguyen, H.D., Genois, M.-M., Zou, L., 2019.  
1121 ATR Protects the Genome against R Loops through a MUS81-Triggered Feedback  
1122 Loop. *Mol Cell*. doi:10.1016/j.molcel.2019.10.010
- 1123 Mertz, J.A., Conery, A.R., Bryant, B.M., Sandy, P., Balasubramanian, S., Mele, D.A.,  
1124 Bergeron, L., Sims, R.J., 2011. Targeting MYC dependence in cancer by inhibiting  
1125 BET bromodomains. *Proc. Natl. Acad. Sci. U.S.A.* 108, 16669–16674.  
1126 doi:10.1073/pnas.1108190108
- 1127 Morales, J.C., Richard, P., Patidar, P.L., Motea, E.A., Dang, T.T., Manley, J.L.,  
1128 Boothman, D.A., 2016. XRN2 Links Transcription Termination to DNA Damage and  
1129 Replication Stress. *PLoS Genet* 12, e1006107.
- 1130 Muhar, M., Ebert, A., Neumann, T., Umkehrer, C., Jude, J., Wieshofer, C.,  
1131 Rescheneder, P., Lipp, J.J., Herzog, V.A., Reichholf, B., Cisneros, D.A., Hoffmann,  
1132 T., Schlapansky, M.F., Bhat, P., Haeseler, von, A., Köcher, T., Obenauf, A.C.,  
1133 Popow, J., Ameres, S.L., Zuber, J., 2018. SLAM-seq defines direct gene-regulatory  
1134 functions of the BRD4-MYC axis. *Science* 360, 800–805.  
1135 doi:10.1126/science.aao2793
- 1136 Nguyen, H.D., Yadav, T., Giri, S., Saez, B., Graubert, T.A., Zou, L., 2017. Functions of  
1137 Replication Protein A as a Sensor of R Loops and a Regulator of RNaseH1. *Mol*  
1138 *Cell* 65, 832–847.e4. doi:10.1016/j.molcel.2017.01.029
- 1139 Odore, E., Lokiec, F., Cvitkovic, E., Bekradda, M., Herait, P., Bourdel, F., Kahatt, C.,  
1140 Raffoux, E., Stathis, A., Thieblemont, C., Quesnel, B., Cunningham, D., Riveiro,  
1141 M.E., Rezaï, K., 2015. Phase I Population Pharmacokinetic Assessment of the Oral  
1142 Bromodomain Inhibitor OTX015 in Patients with Haematologic Malignancies.  
1143 *Clinical Pharmacokinetics* 55, 397–405. doi:10.1007/s40262-015-0327-6

- 1144 Olson, E., Nievera, C.J., Klimovich, V., Fanning, E., Wu, X., 2006. RPA2 is a direct  
1145 downstream target for ATR to regulate the S-phase checkpoint. *J Biol Chem* 281,  
1146 39517–39533. doi:10.1074/jbc.M605121200
- 1147 Ozer, H.G., El-Gamal, D., Powell, B., Hing, Z.A., Blachly, J.S., Harrington, B., Mitchell,  
1148 S., Grieselhuber, N.R., Williams, K., Lai, T.-H., Alinari, L., Baiocchi, R.A., Brinton, L.,  
1149 Baskin, E., Cannon, M., Beaver, L., Goettl, V.M., Lucas, D.M., Woyach, J.A.,  
1150 Sampath, D., Lehman, A.M., Yu, L., Zhang, J., Ma, Y., Zhang, Y., Spevak, W., Shi,  
1151 S., Severson, P., Shellooe, R., Carias, H., Tsang, G., Dong, K., Ewing, T.,  
1152 Marimuthu, A., Tantoy, C., Walters, J., Sanftner, L., Rezaei, H., Nespi, M., Matusow,  
1153 B., Habets, G., Ibrahim, P., Zhang, C., Mathé, E.A., Bollag, G., Byrd, J.C.,  
1154 Lapalombella, R., 2018. BRD4 Profiling Identifies Critical Chronic Lymphocytic  
1155 Leukemia Oncogenic Circuits and Reveals Sensitivity to PLX51107, a Novel  
1156 Structurally Distinct BET Inhibitor. *Cancer Discov* 8, 458–477. doi:10.1158/2159-  
1157 8290.CD-17-0902
- 1158 Parajuli, S., Tealsey, D.C., Murali, B., Jackson, J., Vindigni, A., Stewart, S.A., 2017.  
1159 Human Ribonuclease H1 resolves R loops and thereby enables progression of the  
1160 DNA replication fork. *J Biol Chem* jbc.M117.787473–19.  
1161 doi:10.1074/jbc.M117.787473
- 1162 Patel, M.C., Debrosse, M., Smith, M., Dey, A., Huynh, W., Sarai, N., Heightman, T.D.,  
1163 Tamura, T., Ozato, K., 2013. BRD4 coordinates recruitment of pause release factor  
1164 P-TEFb and the pausing complex NELF/DSIF to regulate transcription elongation of  
1165 interferon-stimulated genes. *Mol. Cell. Biol.* 33, 2497–2507.  
1166 doi:10.1128/MCB.01180-12
- 1167 Pericole, F.V., Lazarini, M., de Paiva, L.B., Duarte, A.D.S.S., Vieira Ferro, K.P.,  
1168 Niemann, F.S., Roversi, F.M., Olalla Saad, S.T., 2019. BRD4 Inhibition Enhances  
1169 Azacitidine Efficacy in Acute Myeloid Leukemia and Myelodysplastic Syndromes.  
1170 *Front Oncol* 9, 16. doi:10.3389/fonc.2019.00016
- 1171 Piha-Paul, S.A., Sachdev, J.C., Barve, M., LoRusso, P., Szmulewitz, R., Patel, S.P.,  
1172 Lara, P.N., Chen, X., Hu, B., Freise, K.J., Modi, D., Sood, A., Hutti, J.E., Wolff, J.,  
1173 O'Neil, B.H., 2019. First-in-Human Study of Mivebresib (ABBV-075), an Oral Pan-  
1174 Inhibitor of Bromodomain and Extra Terminal Proteins, in Patients with  
1175 Relapsed/Refractory Solid Tumors. *Clin. Cancer Res.* 25, 6309–6319.  
1176 doi:10.1158/1078-0432.CCR-19-0578

- 1177 Pivot-Pajot, C., Caron, C., Govin, J., Vion, A., Rousseaux, S., Khochbin, S., 2003.  
1178 Acetylation-dependent chromatin reorganization by BRDT, a testis-specific  
1179 bromodomain-containing protein. *Mol. Cell. Biol.* 23, 5354–5365.  
1180 doi:10.1128/mcb.23.15.5354-5365.2003
- 1181 Porrua, O., Libri, D., 2015. Transcription termination and the control of the  
1182 transcriptome: why, where and how to stop. *Nature Publishing Group* 16, 190–202.  
1183 doi:10.1038/nrm3943
- 1184 Puccetti, M.V., Adams, C.M., Kushinsky, S., Eischen, C.M., 2019. Smarcal1 and Zranb3  
1185 Protect Replication Forks from Myc-Induced DNA Replication Stress. *Cancer Res*  
1186 79, 1612–1623. doi:10.1158/0008-5472.CAN-18-2705
- 1187 Quinet, A., Carvajal-Maldonado, D., Lemacon, D., Vindigni, A., 2017. DNA Fiber  
1188 Analysis: Mind the Gap! *Meth. Enzymol.* 591, 55–82.  
1189 doi:10.1016/bs.mie.2017.03.019
- 1190 Rahman, S., Sowa, M.E., Ottinger, M., Smith, J.A., Shi, Y., Harper, J.W., Howley, P.M.,  
1191 2011. The Brd4 extraterminal domain confers transcription activation independent of  
1192 pTEFb by recruiting multiple proteins, including NSD3. *Mol. Cell. Biol.* 31, 2641–  
1193 2652. doi:10.1128/MCB.01341-10
- 1194 Rathert, P., Roth, M., Neumann, T., Muerdter, F., Roe, J.-S., Muhar, M., Deswal, S.,  
1195 Cerny-Reiterer, S., Peter, B., Jude, J., Hoffmann, T., Boryń, Ł.M., Axelsson, E.,  
1196 Schweifer, N., Tontsch-Grunt, U., Dow, L.E., Gianni, D., Pearson, M., Valent, P.,  
1197 Stark, A., Kraut, N., Vakoc, C.R., Zuber, J., 2015. Transcriptional plasticity promotes  
1198 primary and acquired resistance to BET inhibition. *Nature* 525, 543–547.  
1199 doi:10.1038/nature14898
- 1200 Riccardi, C., Nicoletti, I., 2006. Analysis of apoptosis by propidium iodide staining and  
1201 flow cytometry. *Nat. Protocols* 1, 1458–1461. doi:10.1038/nprot.2006.238
- 1202 Richard, P., Manley, J.L., 2016. R Loops and Links to Human Disease. *J. Mol. Biol.*  
1203 doi:10.1016/j.jmb.2016.08.031
- 1204 Rogakou, E.P., Pilch, D.R., Orr, A.H., Ivanova, V.S., Bonner, W.M., 1998. DNA double-  
1205 stranded breaks induce histone H2AX phosphorylation on serine 139. *J Biol Chem*  
1206 273, 5858–5868. doi:10.1074/jbc.273.10.5858

- 1207 Santos-Pereira, J.M., Aguilera, A., 2015. R loops: new modulators of genome dynamics  
1208 and function. *Nature Reviews Genetics* 16, 583–597. doi:10.1038/nrg3961
- 1209 Schröder, S., Cho, S., Zeng, L., Zhang, Q., Kaehlcke, K., Mak, L., Lau, J., Bisgrove, D.,  
1210 Schnölzer, M., Verdin, E., Zhou, M.-M., Ott, M., 2012. Two-pronged binding with  
1211 bromodomain-containing protein 4 liberates positive transcription elongation factor b  
1212 from inactive ribonucleoprotein complexes. *J Biol Chem* 287, 1090–1099.  
1213 doi:10.1074/jbc.M111.282855
- 1214 Schwab, R.A., Nieminuszczy, J., Shah, F., Langton, J., Lopez Martinez, D., Liang, C.-  
1215 C., Cohn, M.A., Gibbons, R.J., Deans, A.J., Niedzwiedz, W., 2015. The Fanconi  
1216 Anemia Pathway Maintains Genome Stability by Coordinating Replication and  
1217 Transcription. *Mol Cell* 60, 351–361. doi:10.1016/j.molcel.2015.09.012
- 1218 Shao, W., Zeitlinger, J., 2017a. Paused RNA polymerase II inhibits new transcriptional  
1219 initiation. *Nature Publishing Group* 49, 1045–1051. doi:10.1038/ng.3867
- 1220 Shao, W., Zeitlinger, J., 2017b. Paused RNA polymerase II inhibits new transcriptional  
1221 initiation. *Nature Publishing Group* 49, 1045–1051. doi:10.1038/ng.3867
- 1222 Shivji, M.K.K., Renaudin, X., Williams, Ç.H., Venkitaraman, A.R., 2018. BRCA2  
1223 Regulates Transcription Elongation by RNA Polymerase II to Prevent R-Loop  
1224 Accumulation. *Cell Reports* 22, 1031–1039. doi:10.1016/j.celrep.2017.12.086
- 1225 Skourti-Stathaki, K., Proudfoot, N.J., 2014. A double-edged sword: R loops as threats to  
1226 genome integrity and powerful regulators of gene expression. *Genes Dev.* 28,  
1227 1384–1396. doi:10.1101/gad.242990.114
- 1228 Skourti-Stathaki, K., Proudfoot, N.J., Gromak, N., 2011. Human senataxin resolves  
1229 RNA/DNA hybrids formed at transcriptional pause sites to promote Xrn2-dependent  
1230 termination. *Mol Cell* 42, 794–805. doi:10.1016/j.molcel.2011.04.026
- 1231 Sollier, J., Cimprich, K.A., 2015. Breaking bad: R-loops and genome integrity. *Trends in*  
1232 *Cell Biology* 25, 514–522. doi:10.1016/j.tcb.2015.05.003
- 1233 Sollier, J., Stork, C.T., García-Rubio, M.L., Paulsen, R.D., Aguilera, A., Cimprich, K.A.,  
1234 2014. Transcription-Coupled Nucleotide Excision Repair Factors Promote R-Loop-



- 1235 Induced Genome Instability. *Mol Cell* 56, 777–785.  
1236 doi:10.1016/j.molcel.2014.10.020
- 1237 Stork, C.T., Bocek, M., Crossley, M.P., Sollier, J., Sanz, L.A., Chédin, F., Swigut, T.,  
1238 Cimprich, K.A., 2016. Co-transcriptional R-loops are the main cause of estrogen-  
1239 induced DNA damage. *eLife* 5, e17548. doi:10.7554/eLife.17548
- 1240 Stuckey, R., García-Rodríguez, N., Aguilera, A., Wellinger, R.E., 2015. Role for  
1241 RNA:DNA hybrids in origin-independent replication priming in a eukaryotic system.  
1242 *Proc. Natl. Acad. Sci. U.S.A.* 112, 5779–5784. doi:10.1073/pnas.1501769112
- 1243 Sun, C., Yin, J., Fang, Y., Chen, J., Jeong, K.J., Chen, X., Vellano, C.P., Ju, Z., Zhao,  
1244 W., Zhang, D., Lu, Y., Meric-Bernstam, F., Yap, T.A., Hattersley, M., O'Connor,  
1245 M.J., Chen, H., Fawell, S., Lin, S.-Y., Peng, G., Mills, G.B., 2018. BRD4 Inhibition Is  
1246 Synthetic Lethal with PARP Inhibitors through the Induction of Homologous  
1247 Recombination Deficiency. *Cancer Cell* 33, 401–416.e8.  
1248 doi:10.1016/j.ccell.2018.01.019
- 1249 Wahba, L., Amon, J.D., Koshland, D., Vuica-Ross, M., 2011. RNase H and Multiple  
1250 RNA Biogenesis Factors Cooperate to Prevent RNA:DNA Hybrids from Generating  
1251 Genome Instability. *MOLCEL* 44, 978–988. doi:10.1016/j.molcel.2011.10.017
- 1252 Wessel, S.R., Mohni, K.N., Luzwick, J.W., Dungrawala, H., Cortez, D., 2019a.  
1253 Functional Analysis of the Replication Fork Proteome Identifies BET Proteins as  
1254 PCNA Regulators. *Cell Reports* 28, 3497–3509.e4.  
1255 doi:10.1016/j.celrep.2019.08.051
- 1256 Wessel, S.R., Mohni, K.N., Luzwick, J.W., Dungrawala, H., Cortez, D., 2019b.  
1257 Functional Analysis of the Replication Fork Proteome Identifies BET Proteins as  
1258 PCNA Regulators. *Cell Reports* 28, 3497–3509.e4.  
1259 doi:10.1016/j.celrep.2019.08.051
- 1260 Winter, G.E., Mayer, A., Buckley, D.L., Erb, M.A., Roderick, J.E., Vittori, S., Reyes, J.M.,  
1261 di Iulio, J., Souza, A., Ott, C.J., Roberts, J.M., Zeid, R., Scott, T.G., Paulk, J.,  
1262 Lachance, K., Olson, C.M., Dastjerdi, S., Bauer, S., Lin, C.Y., Gray, N.S., Kelliher,  
1263 M.A., Churchman, L.S., Bradner, J.E., 2017. BET Bromodomain Proteins Function  
1264 as Master Transcription Elongation Factors Independent of CDK9 Recruitment. *Mol*  
1265 *Cell*. doi:10.1016/j.molcel.2017.06.004

- 1266 Xiao, Y., Luo, M., Hayes, R.P., Kim, J., Ng, S., Ding, F., Liao, M., Ke, A., 2017.  
1267 Structure Basis for Directional R-loop Formation and Substrate Handover  
1268 Mechanisms in Type I CRISPR-Cas System. *Cell* 170, 48–60.e11.  
1269 doi:10.1016/j.cell.2017.06.012
- 1270 Zatreanu, D., Han, Z., Mitter, R., Tumini, E., Williams, H., Gregersen, L., Dirac-  
1271 Svejstrup, A.B., Roma, S., Stewart, A., Aguilera, A., Svejstrup, J.Q., 2019.  
1272 Elongation Factor TFIIS Prevents Transcription Stress and R-Loop Accumulation to  
1273 Maintain Genome Stability. *MOLCEL* 76, 57–69.e9.  
1274 doi:10.1016/j.molcel.2019.07.037
- 1275 Zeman, M.K., Cimprich, K.A., 2014. Causes and consequences of replication stress.  
1276 *Nat. Cell Biol.* 16, 2–9. doi:10.1038/ncb2897
- 1277 Zhang, J., Dulak, A.M., Hattersley, M.M., Willis, B.S., Nikkilä, J., Wang, A., Lau, A.,  
1278 Reimer, C., Zinda, M., Fawell, S.E., Mills, G.B., Chen, H., 2018. BRD4 facilitates  
1279 replication stress-induced DNA damage response. *Oncogene* 37, 3763–3777.  
1280 doi:10.1038/s41388-018-0194-3
- 1281 Zhang, W., Prakash, C., Sum, C., Gong, Y., Li, Y., Kwok, J.J.T., Thiessen, N.,  
1282 Pettersson, S., Jones, S.J.M., Knapp, S., Yang, H., Chin, K.-C., 2012.  
1283 Bromodomain-containing protein 4 (BRD4) regulates RNA polymerase II serine 2  
1284 phosphorylation in human CD4+ T cells. *J Biol Chem* 287, 43137–43155.  
1285 doi:10.1074/jbc.M112.413047
- 1286 Zhou, Y., Zhou, J., Lu, X., Tan, T.-Z., Chng, W.-J., 2018. BET Bromodomain inhibition  
1287 promotes De-repression of TXNIP and activation of ASK1-MAPK pathway in acute  
1288 myeloid leukemia. *BMC Cancer* 18, 731–11. doi:10.1186/s12885-018-4661-6
- 1289 Zuber, J., Shi, J., Wang, E., Rappaport, A.R., Herrmann, H., Sison, E.A., Magoon, D.,  
1290 Qi, J., Blatt, K., Wunderlich, M., Taylor, M.J., Johns, C., Chicas, A., Mulloy, J.C.,  
1291 Kogan, S.C., Brown, P., Valent, P., Bradner, J.E., Lowe, S.W., Vakoc, C.R., 2011.  
1292 RNAi screen identifies Brd4 as a therapeutic target in acute myeloid leukaemia.  
1293 *Nature* 478, 524–528. doi:10.1038/nature10334
- 1294



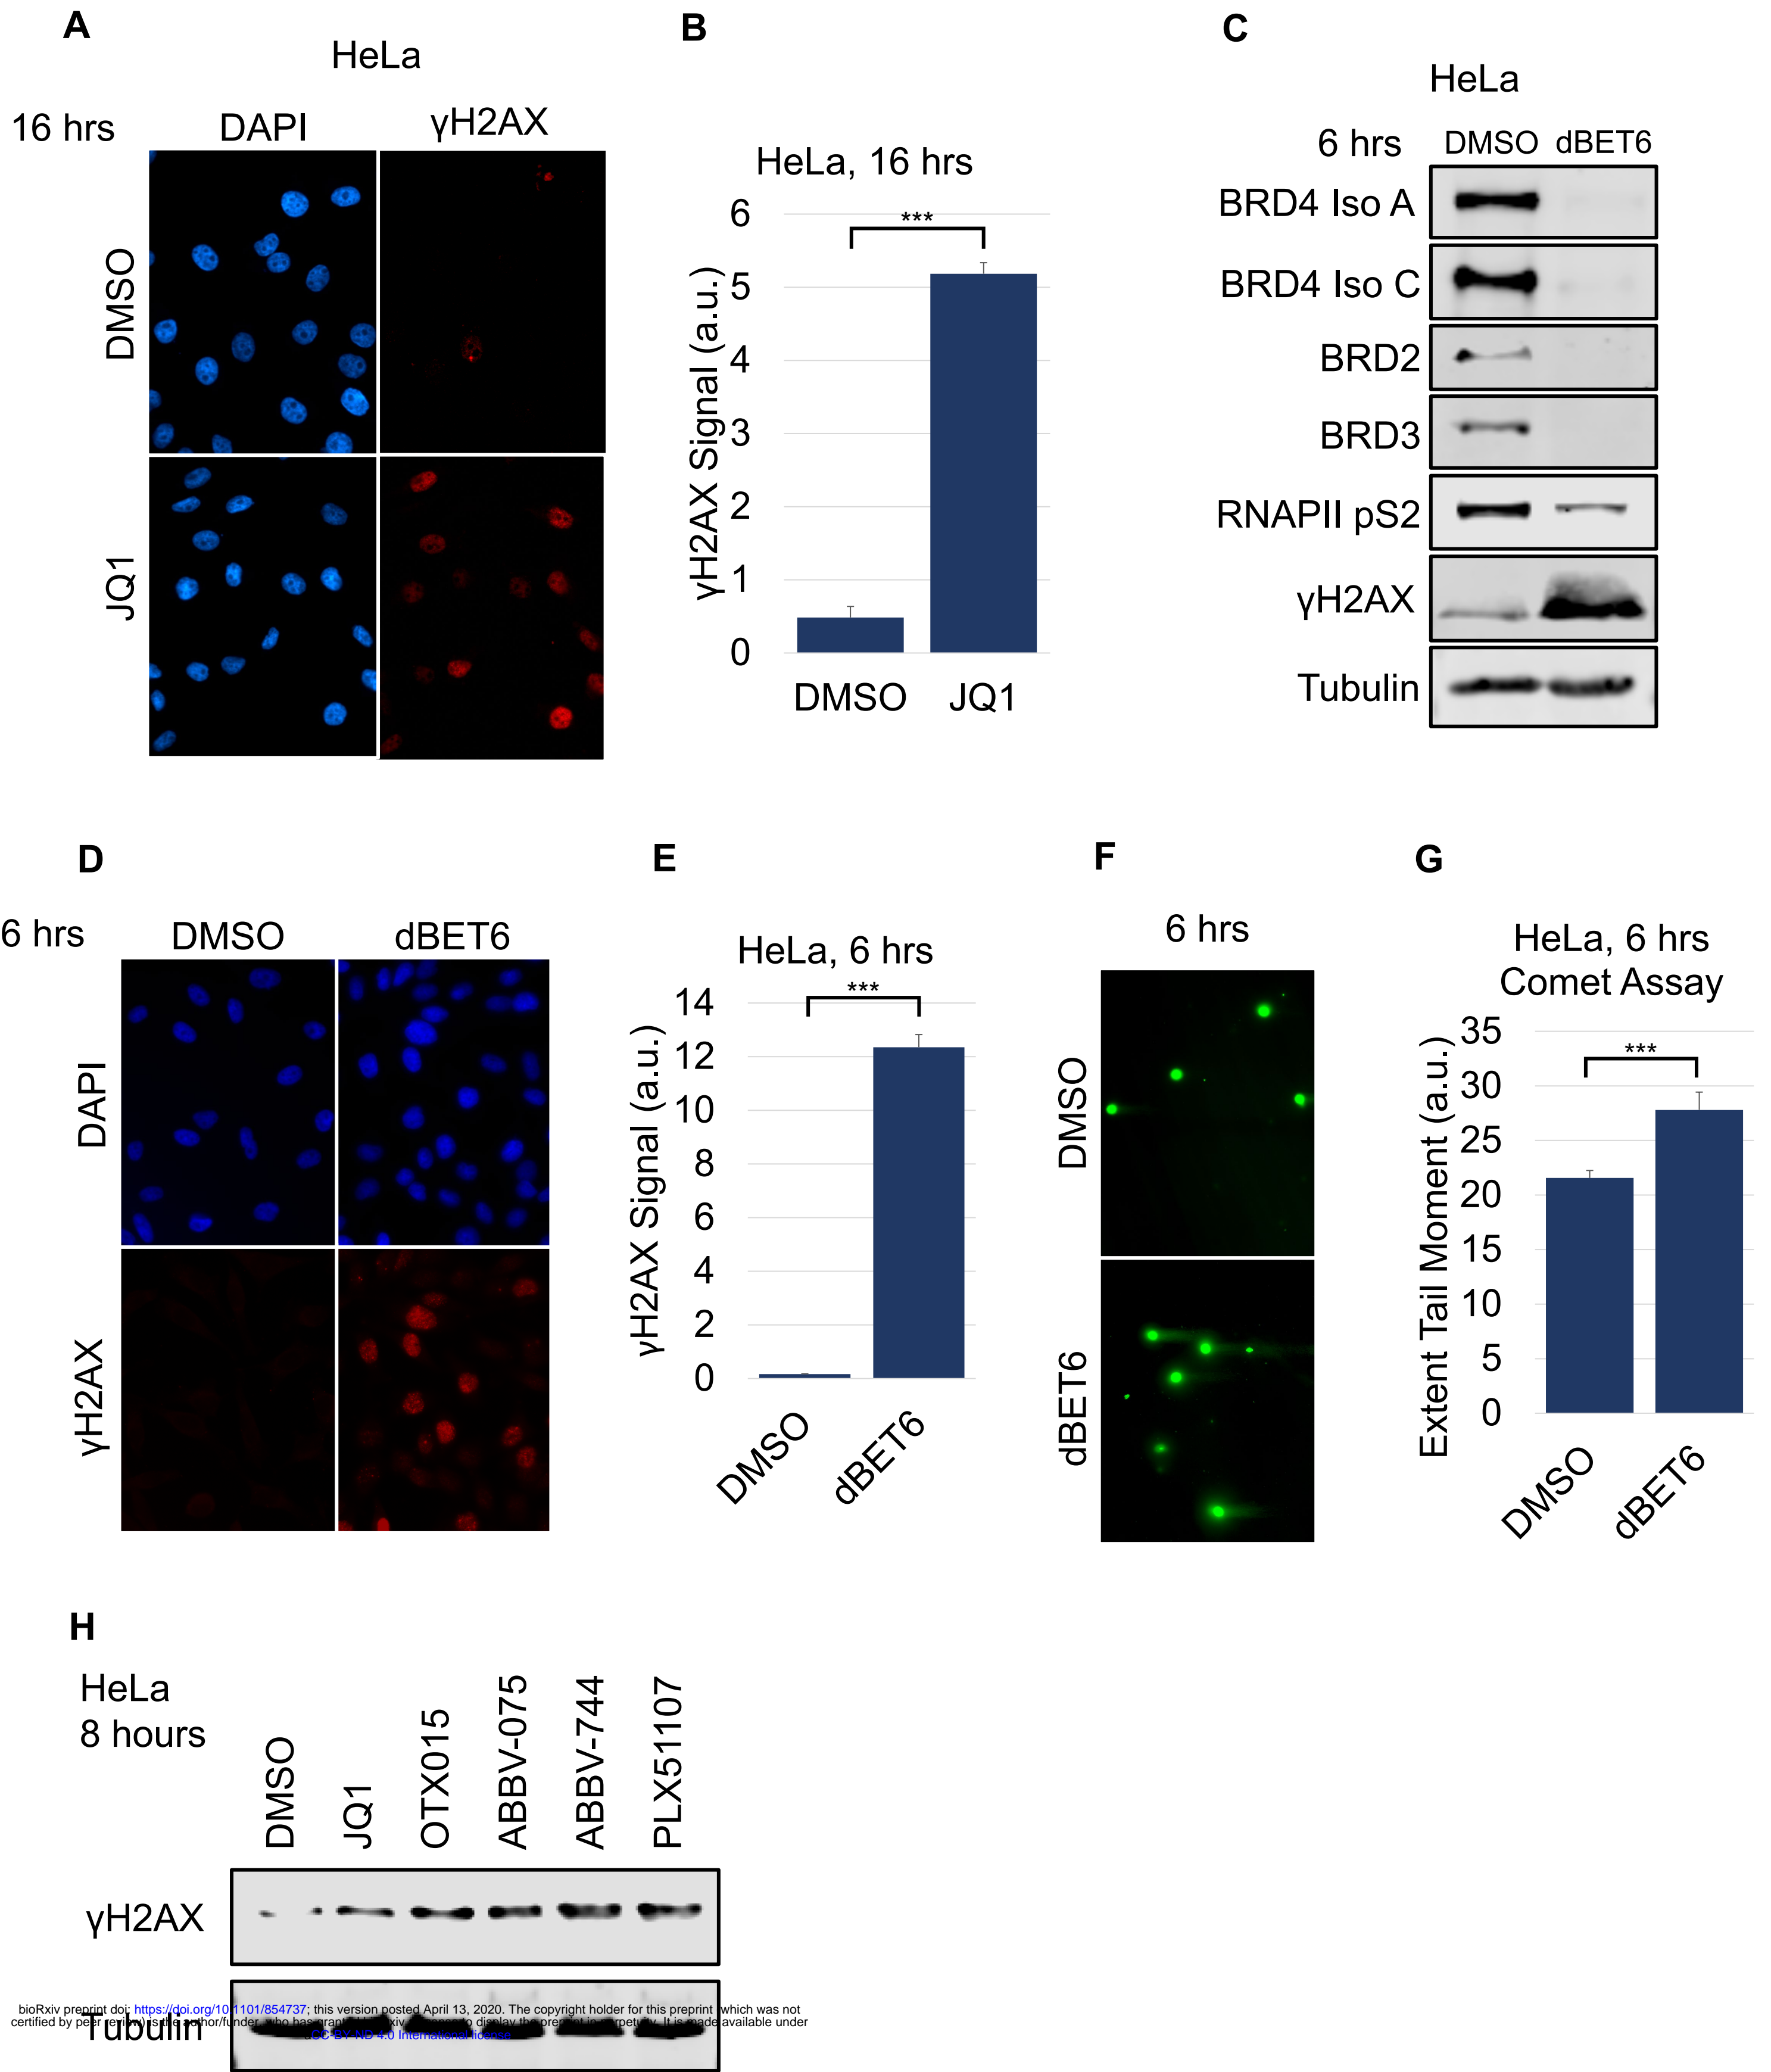

Figure 1

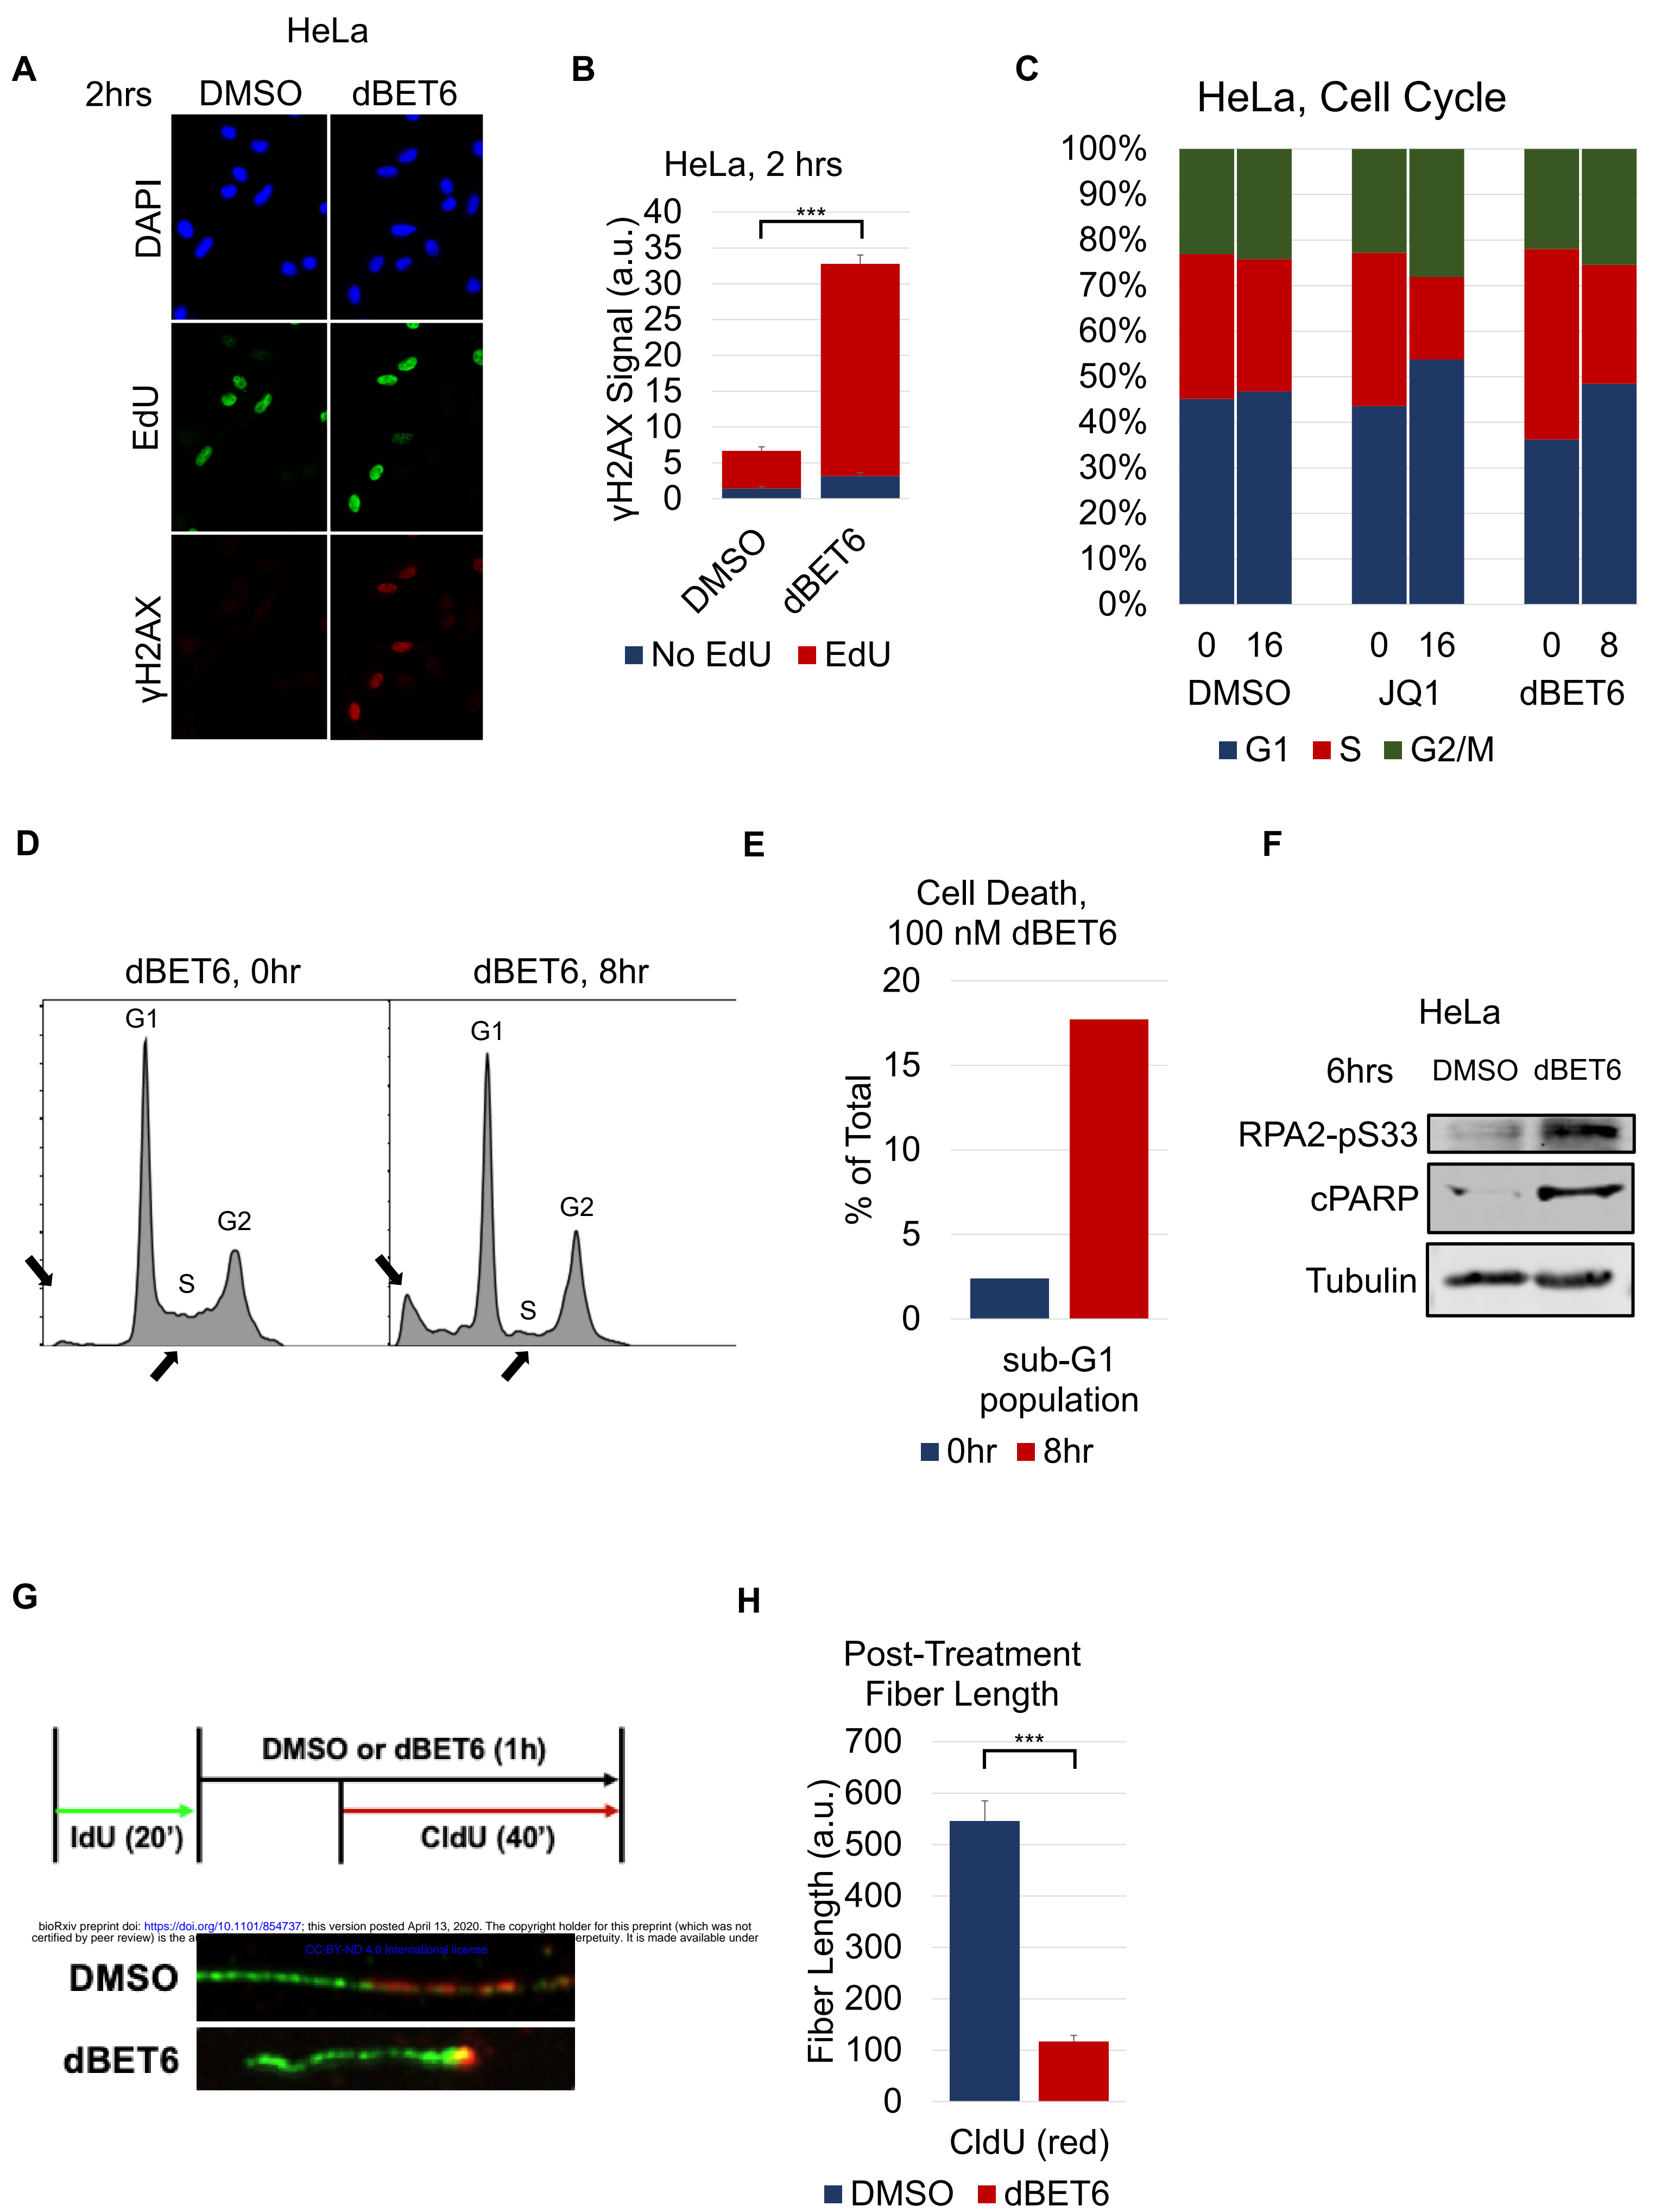

Figure 2

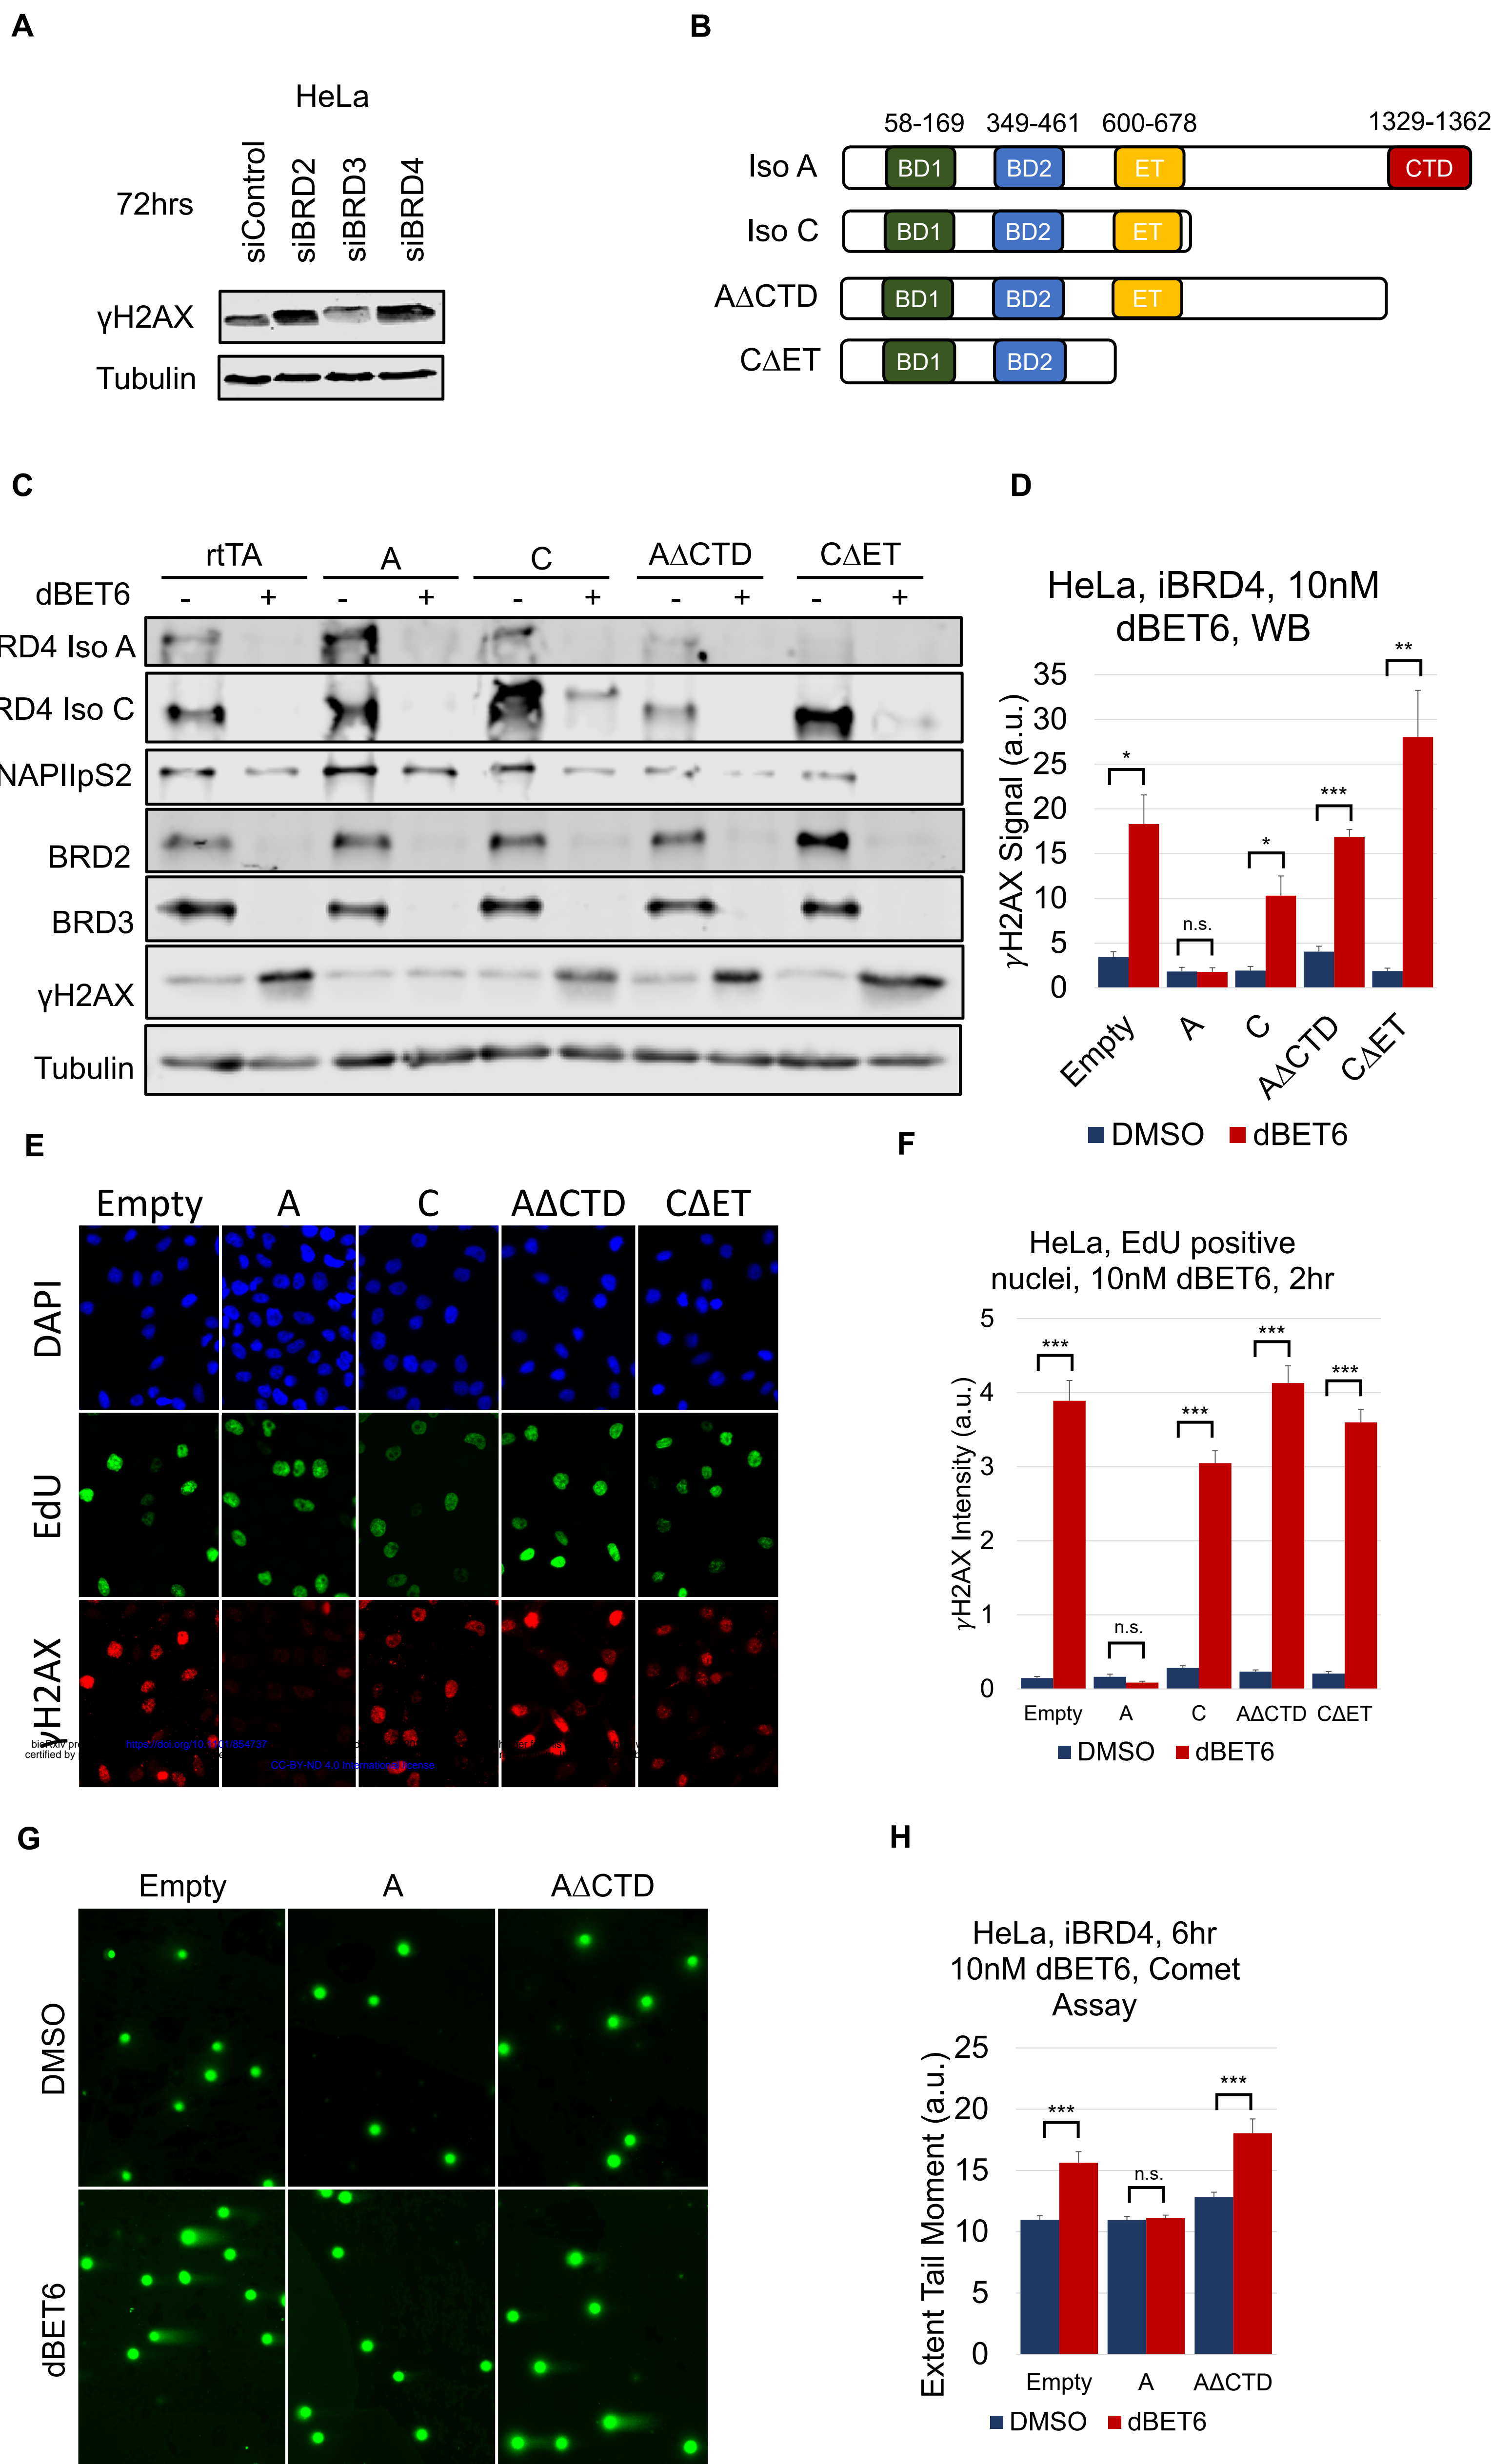

Figure 3



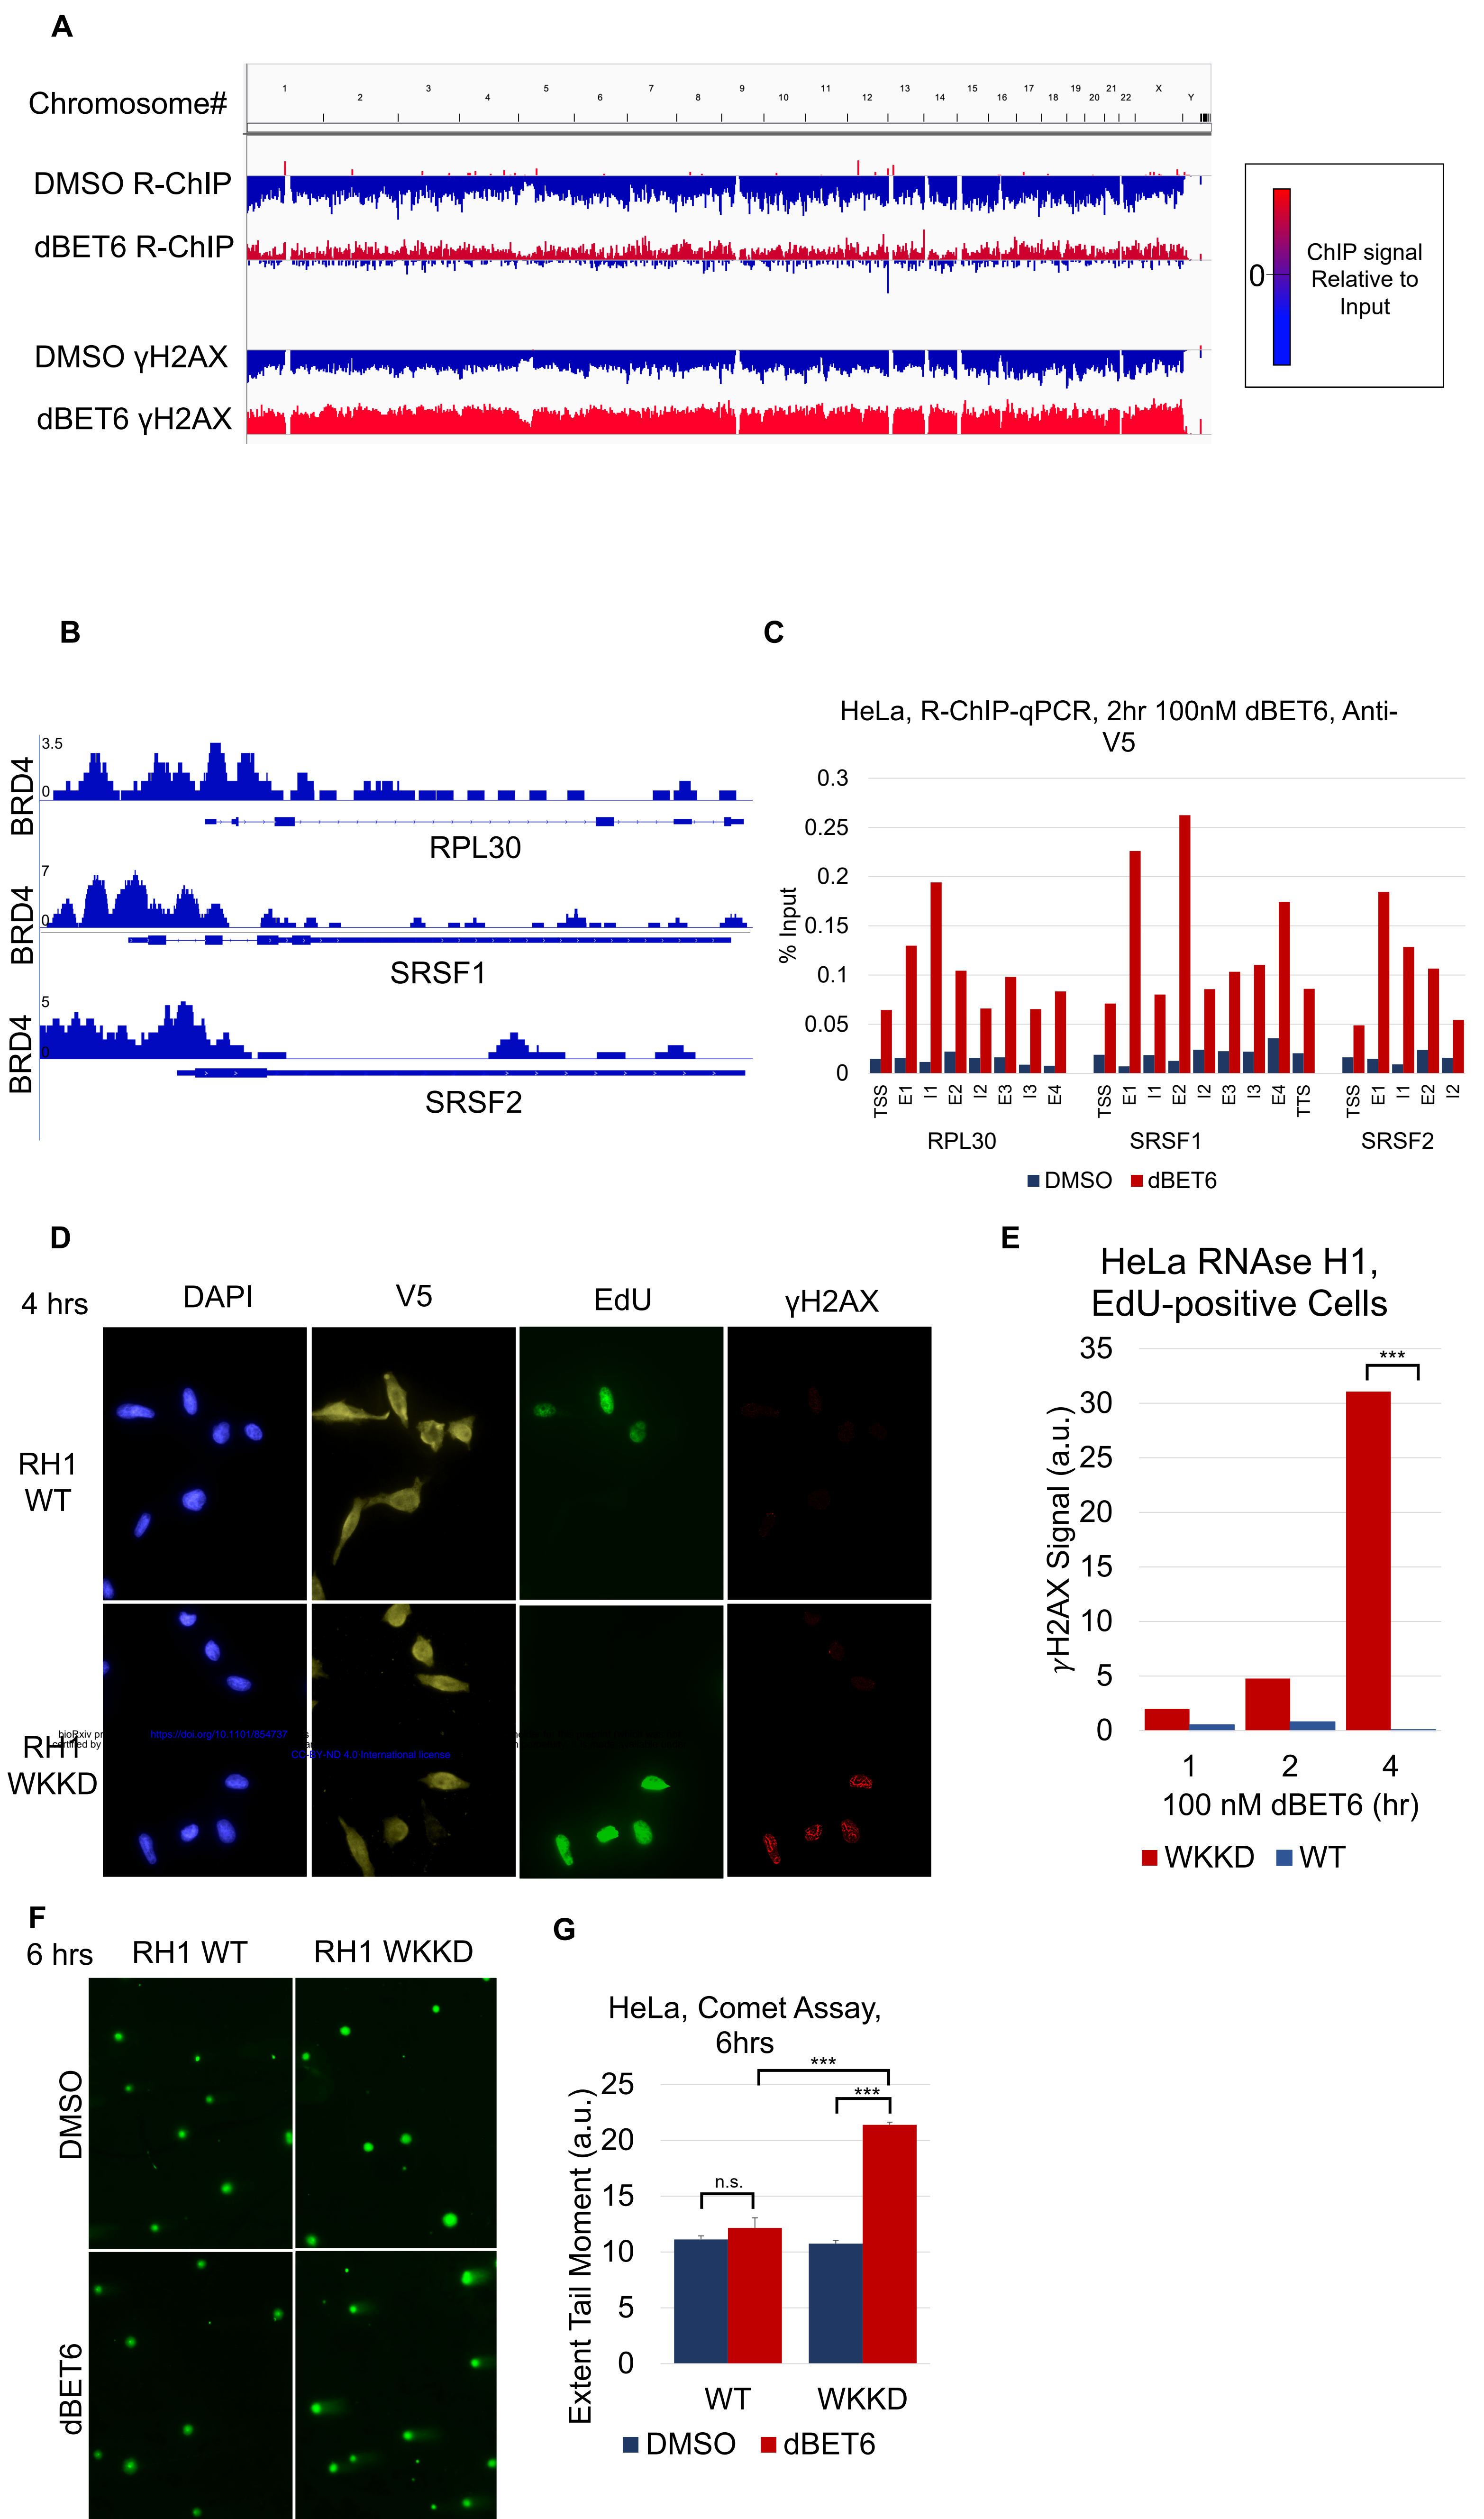

Figure 4

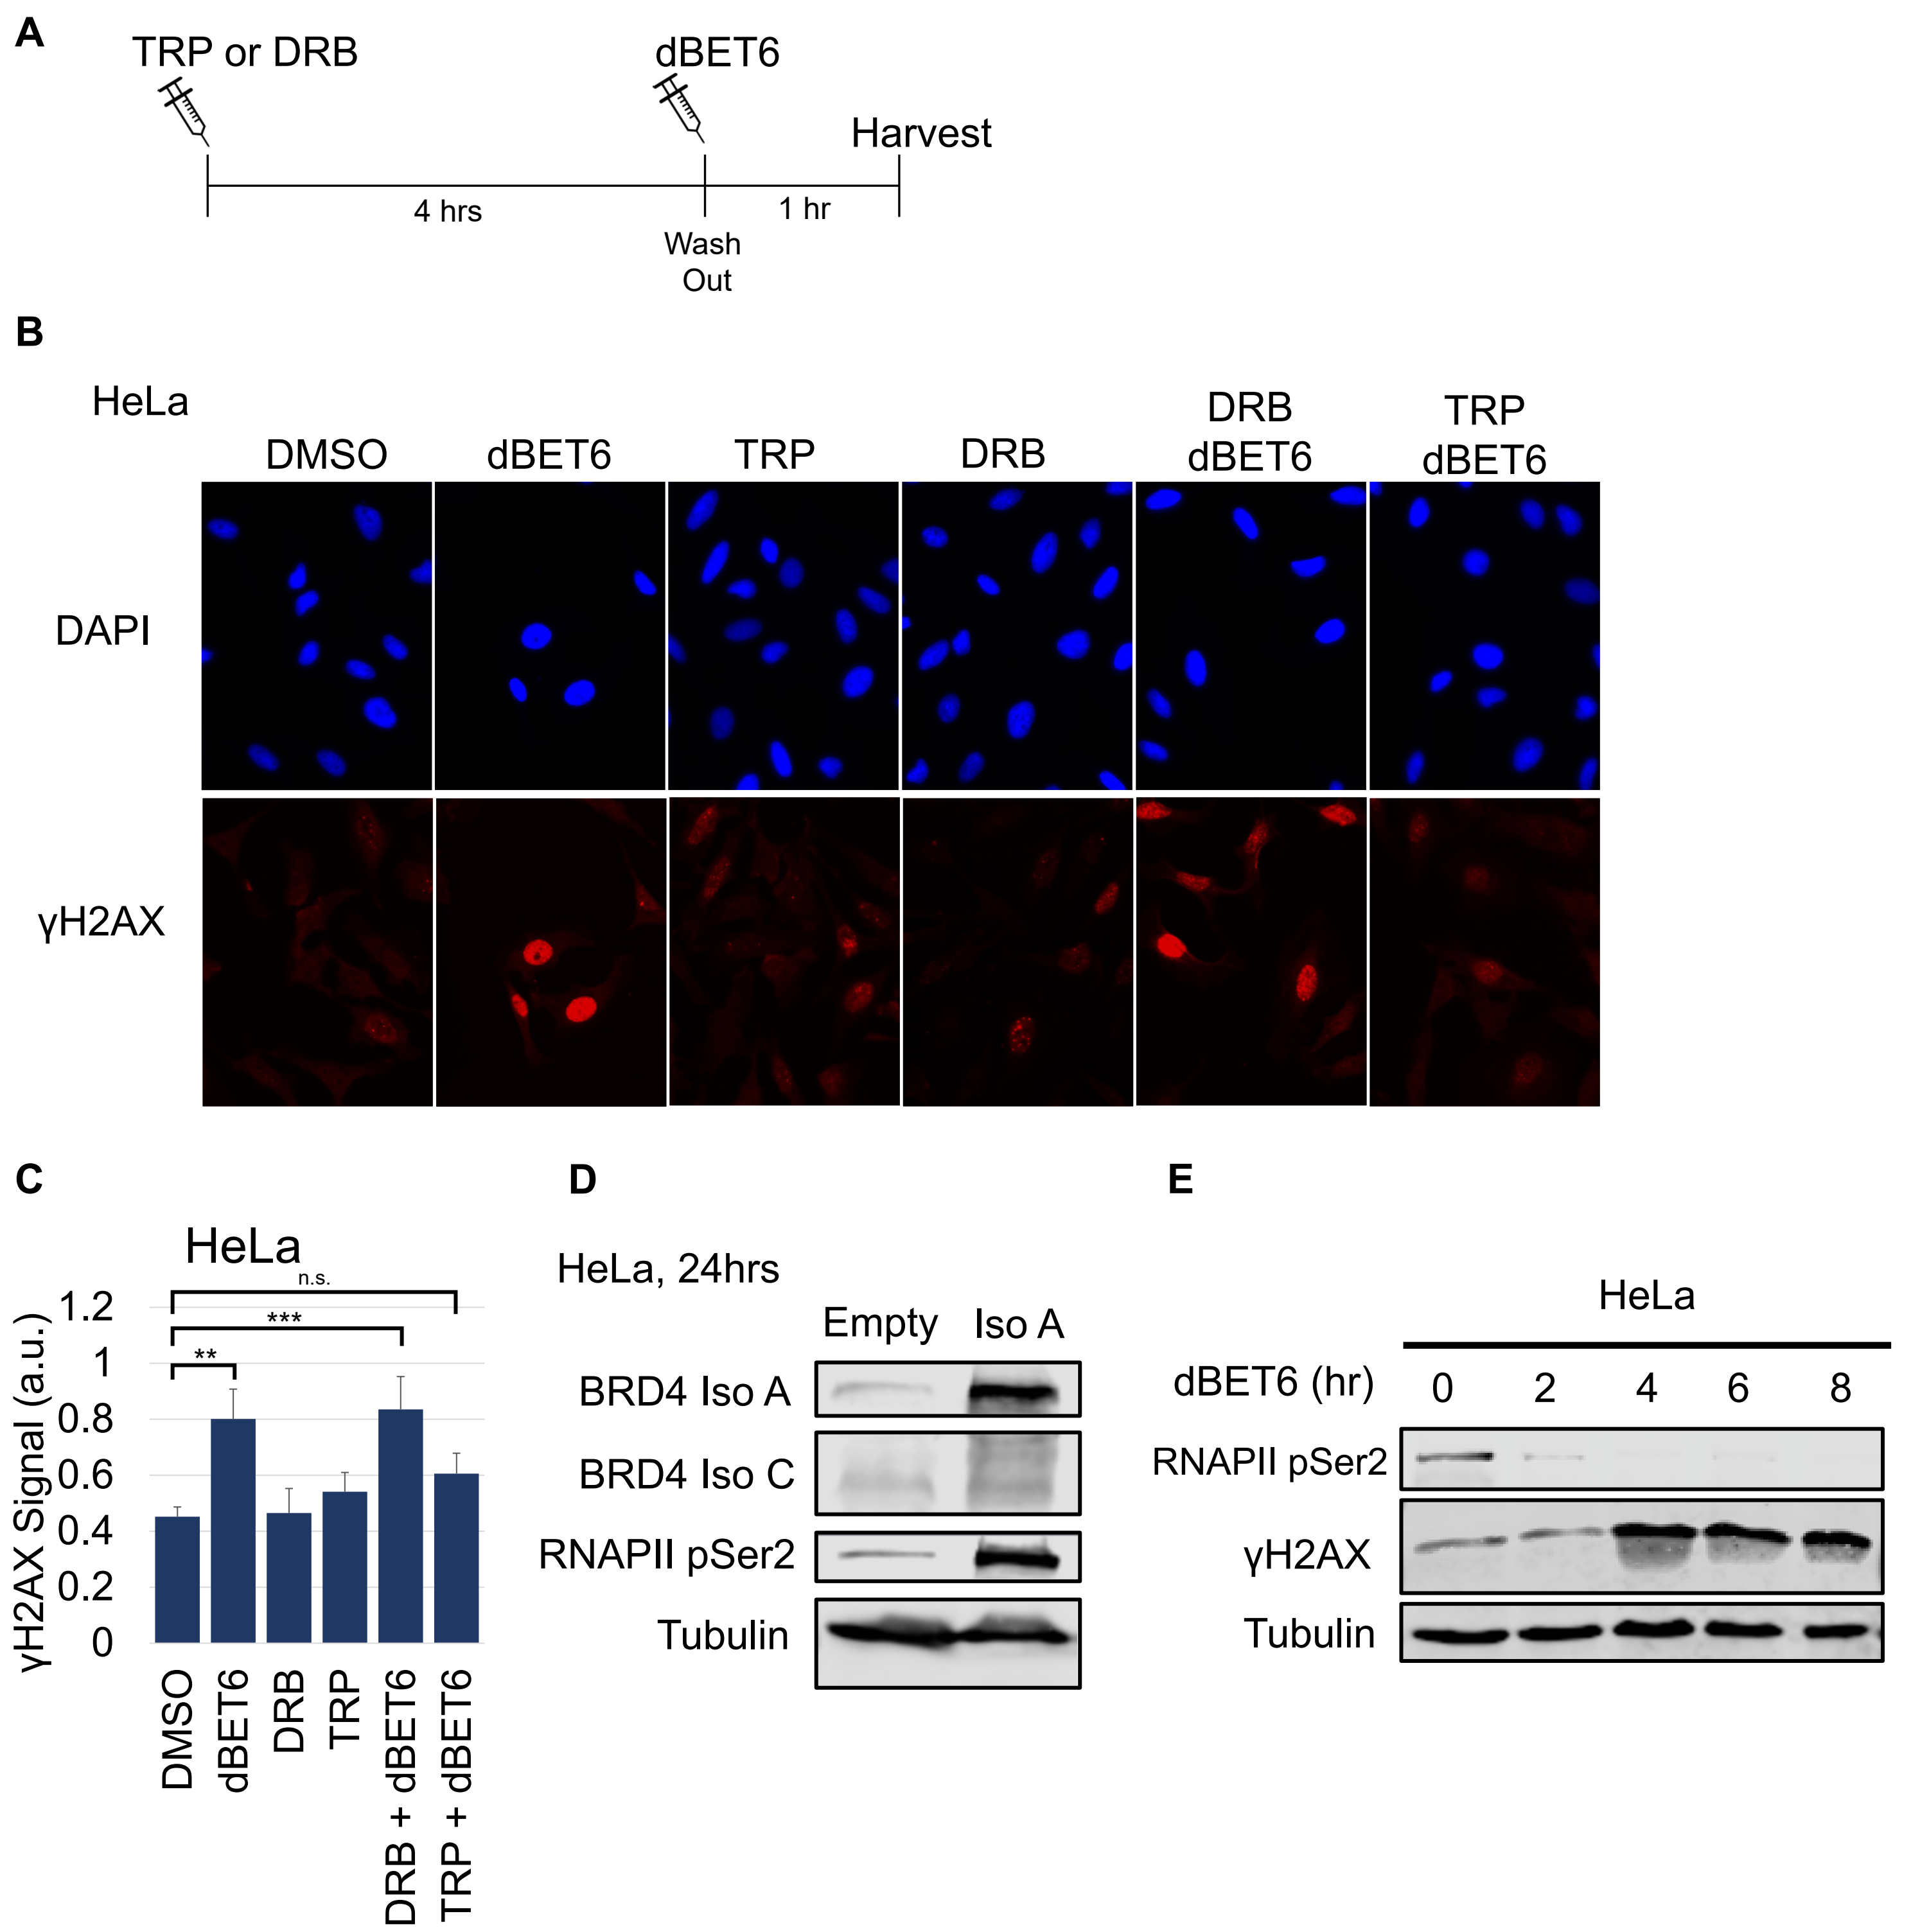

Figure 5

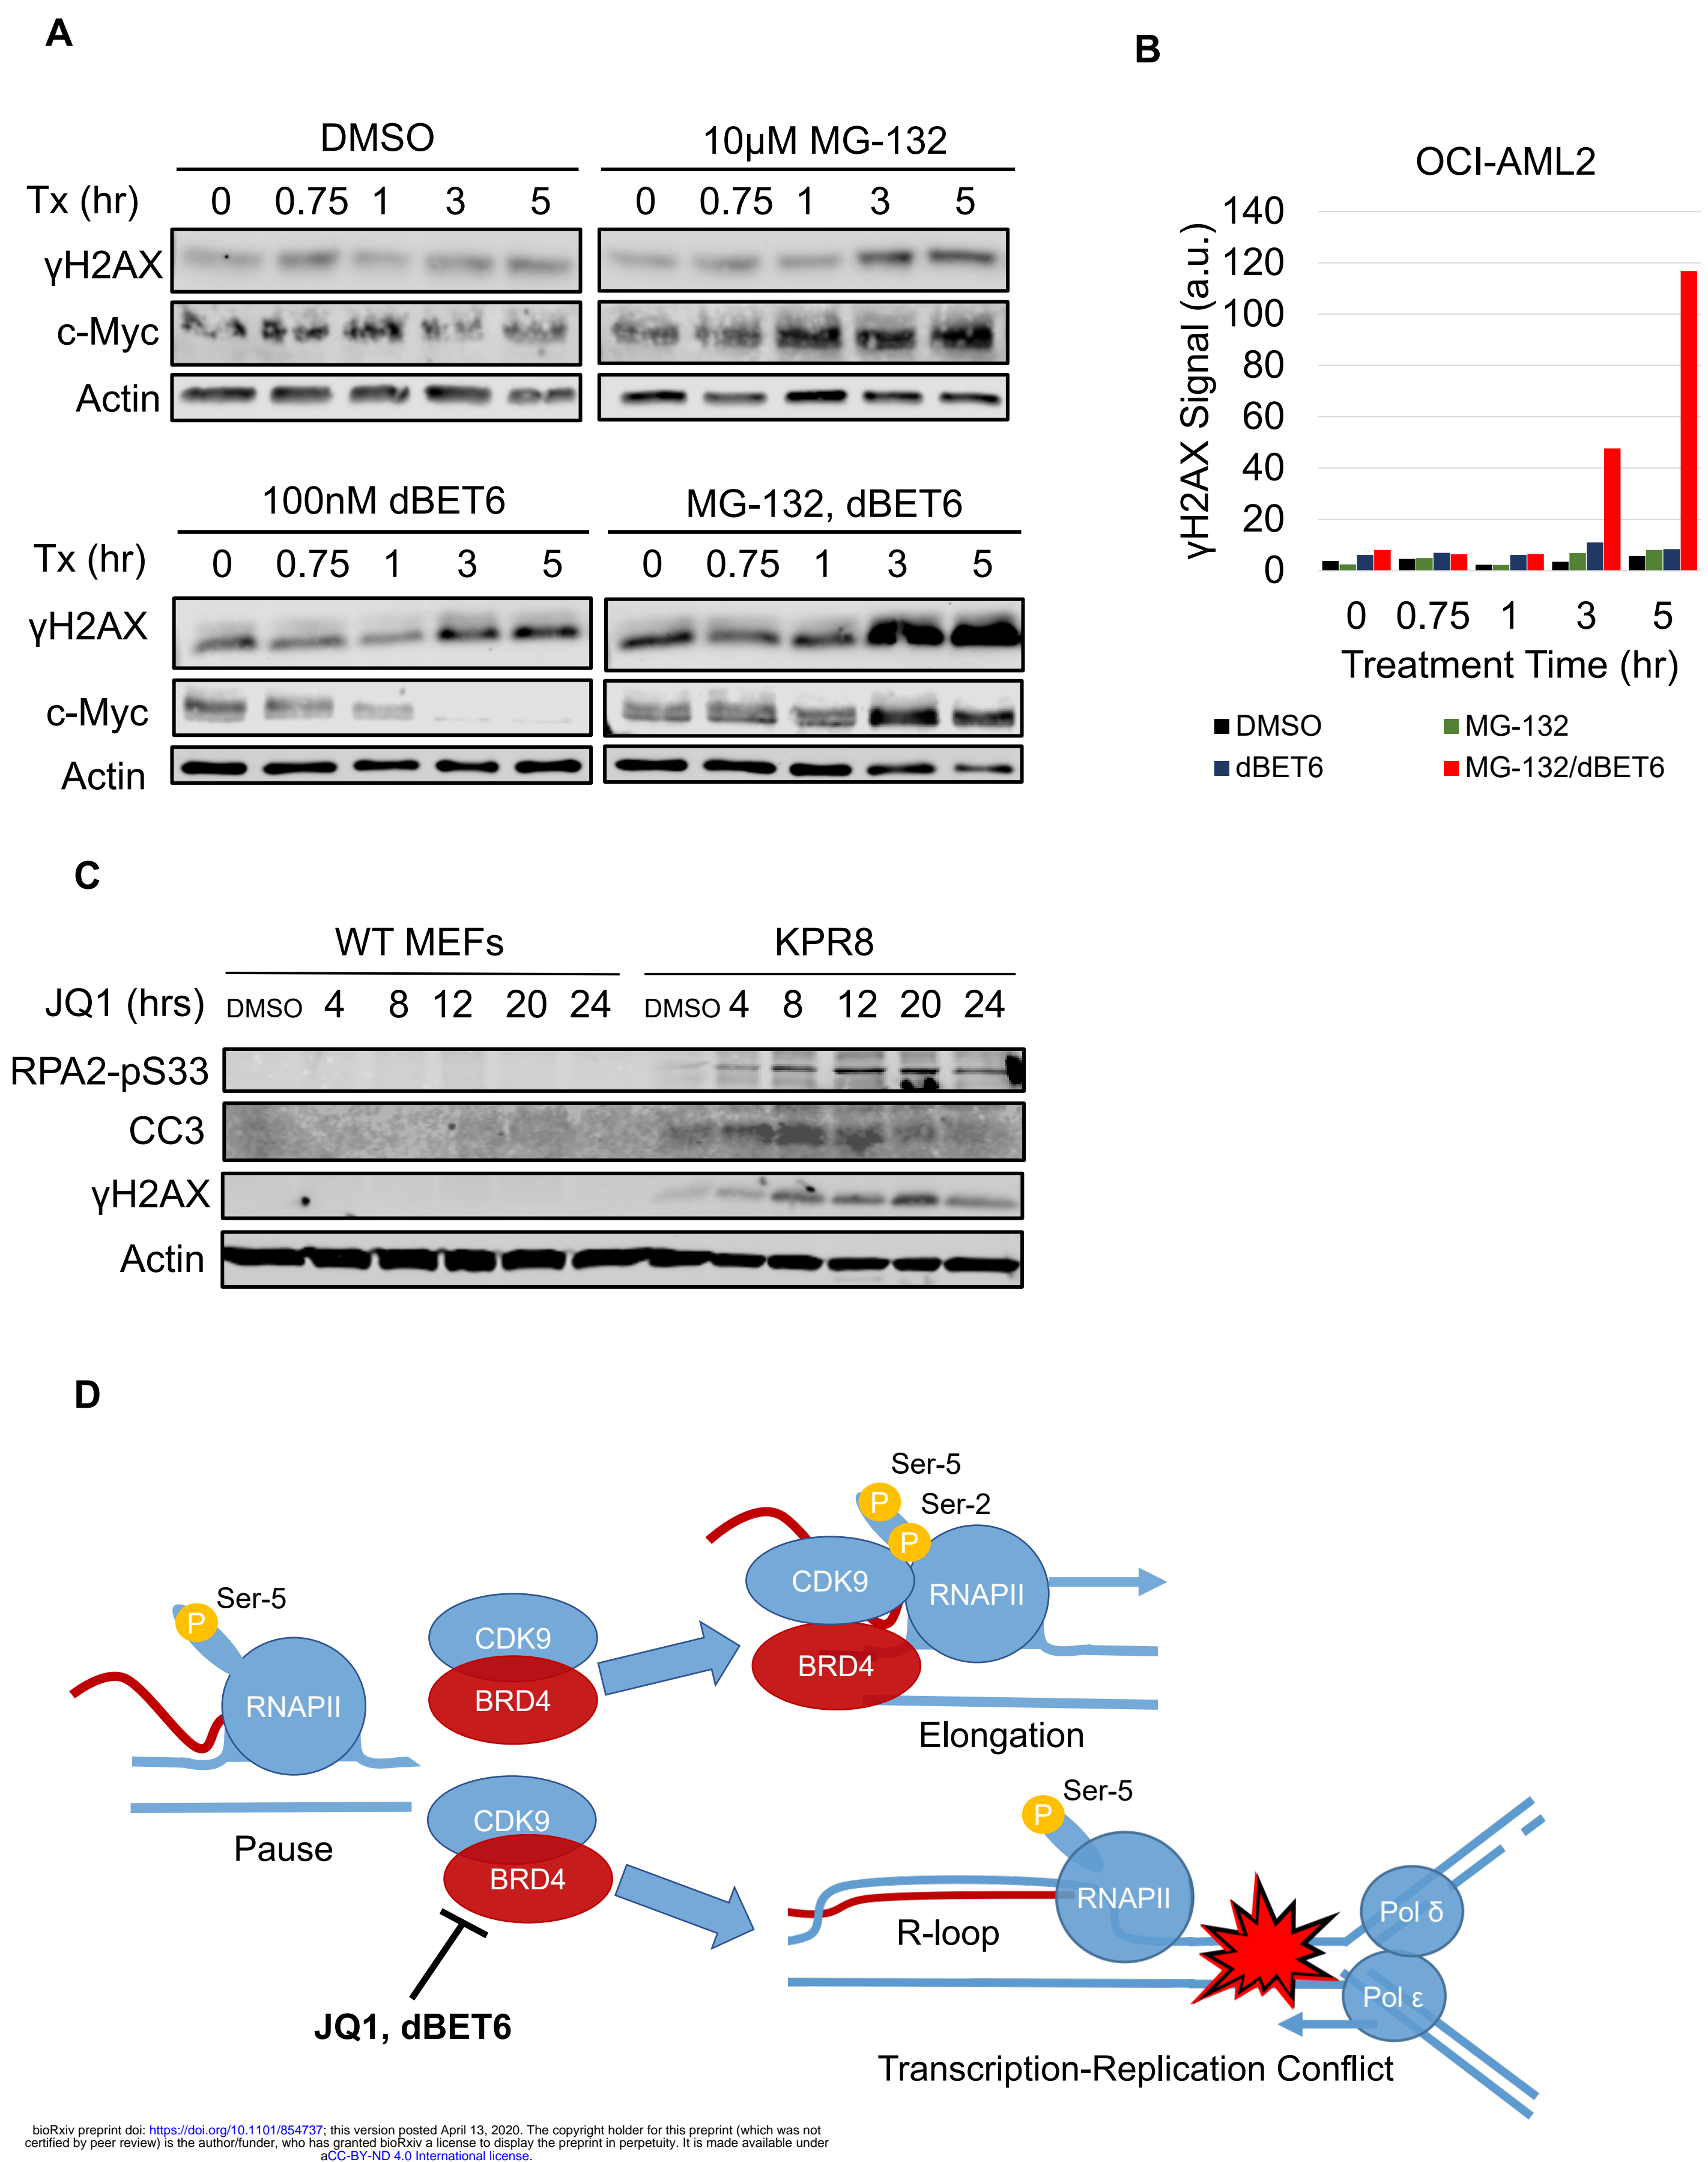

Figure 6



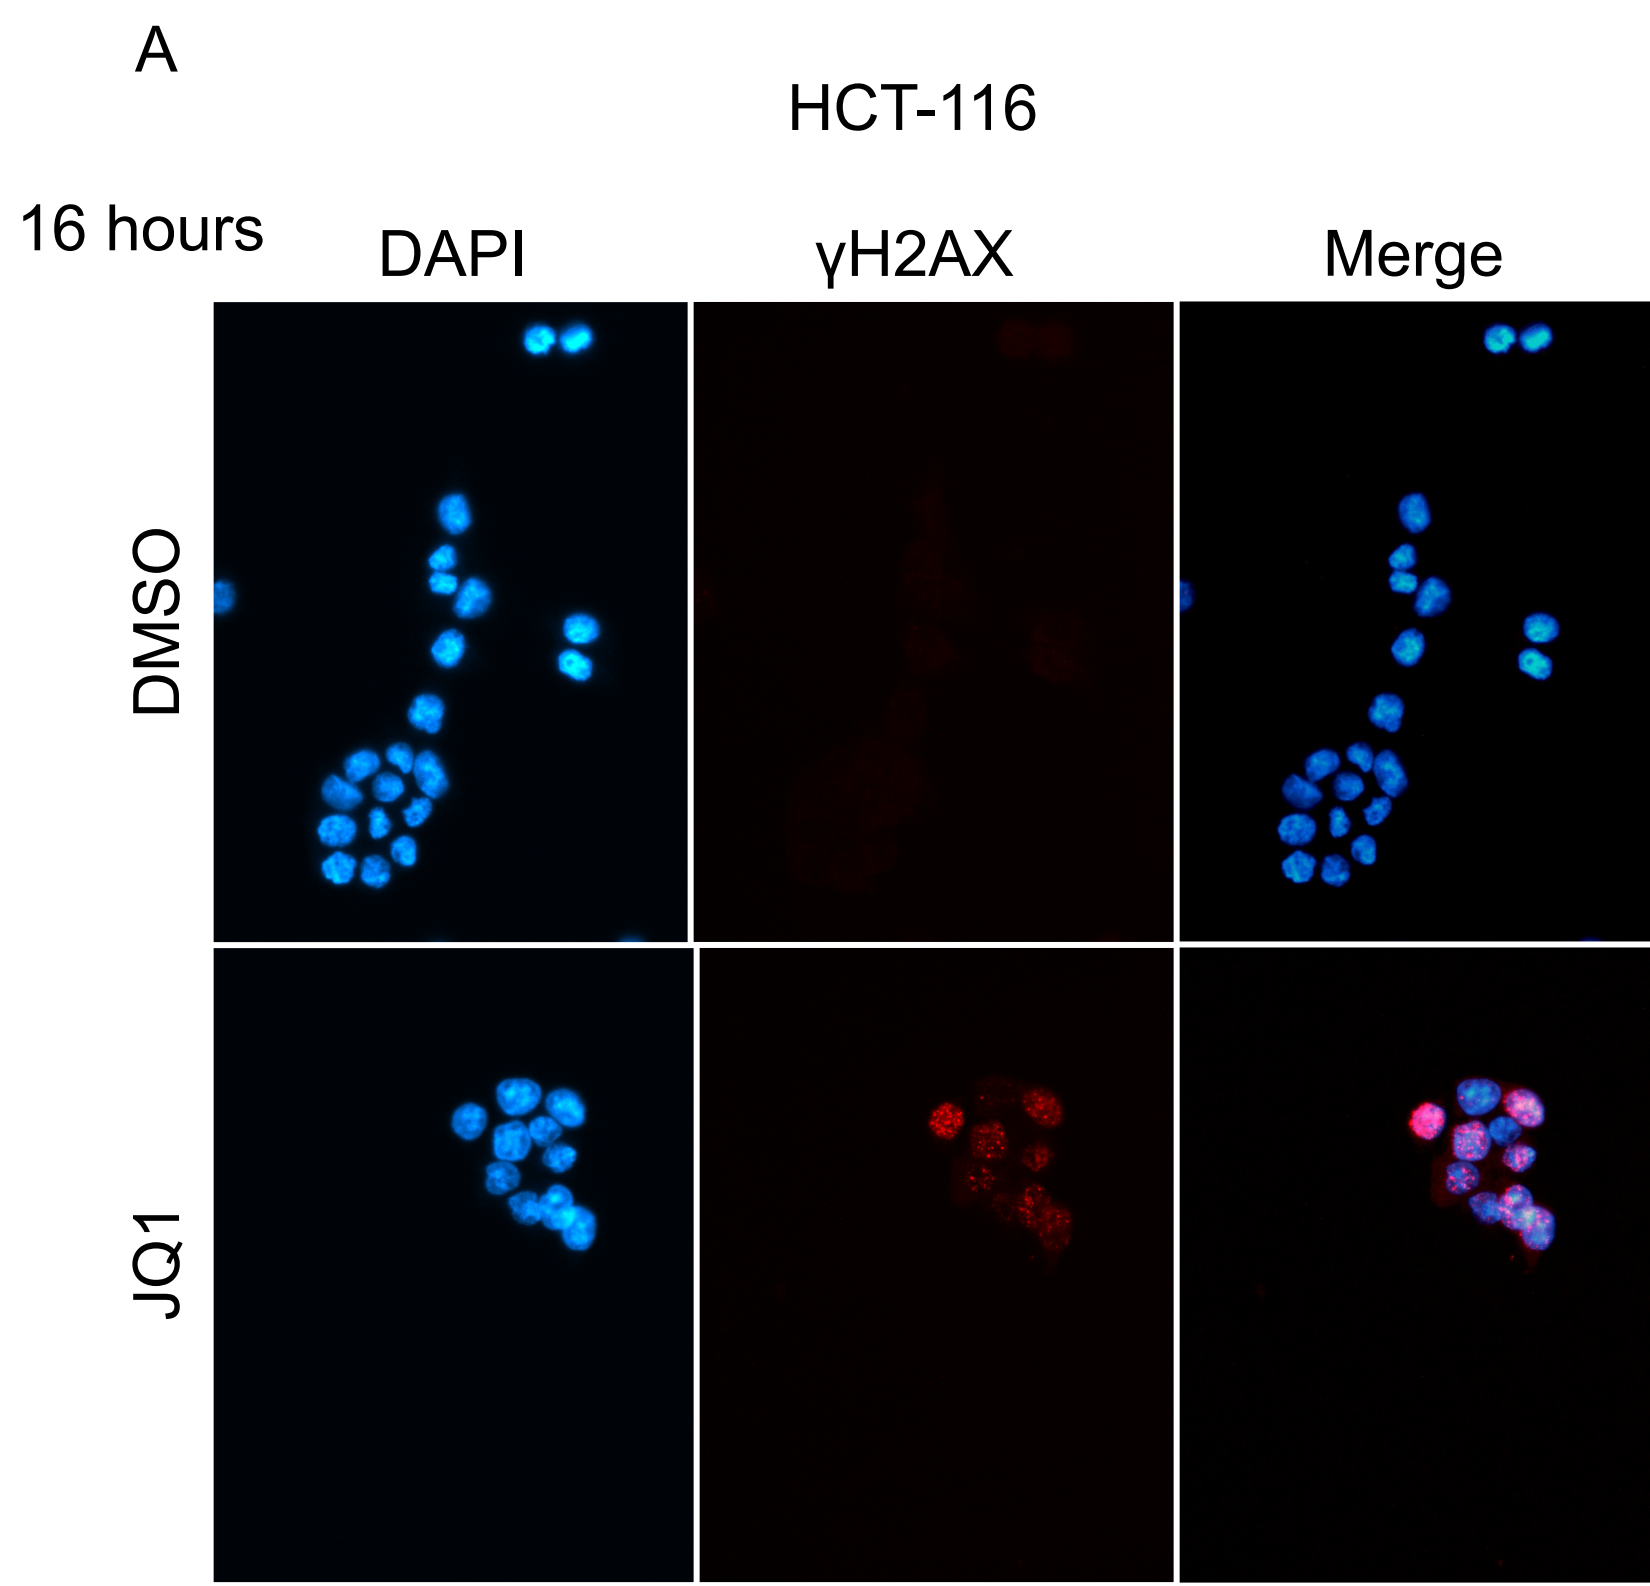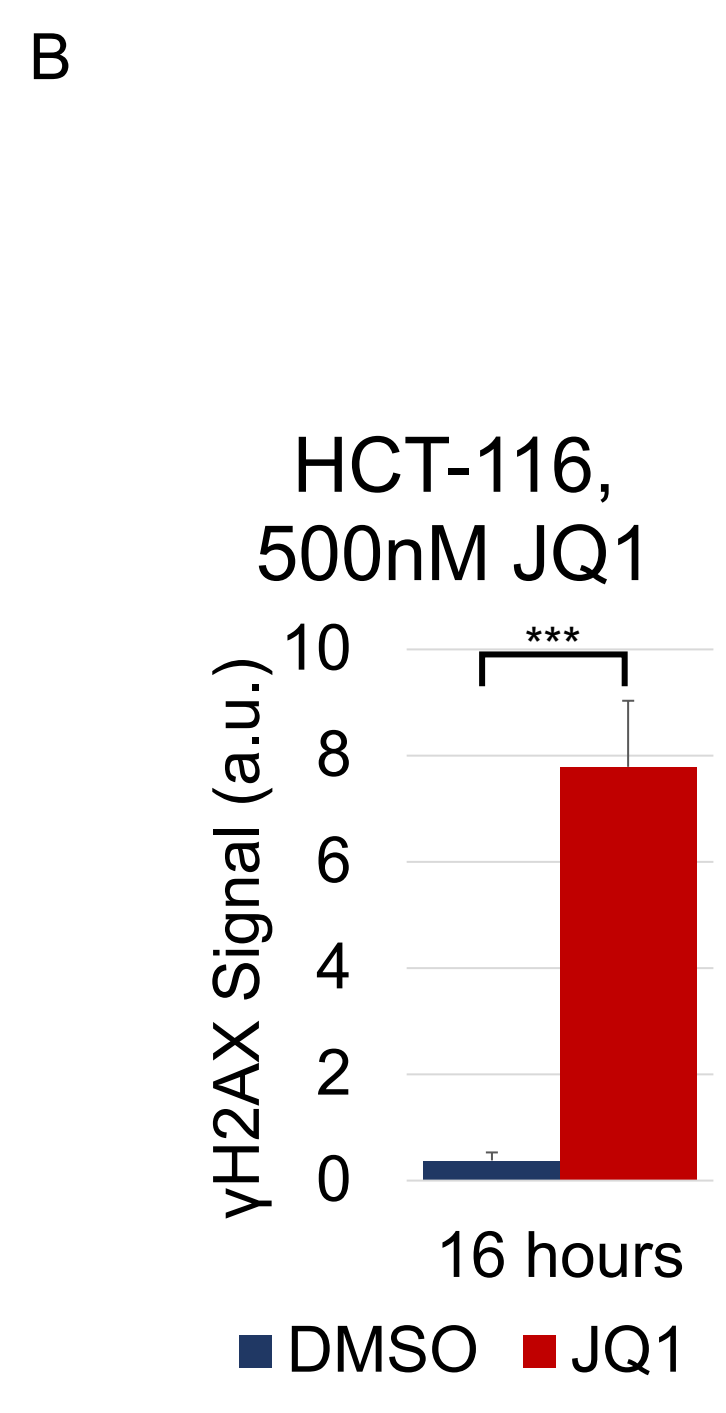

Figure S1

**A**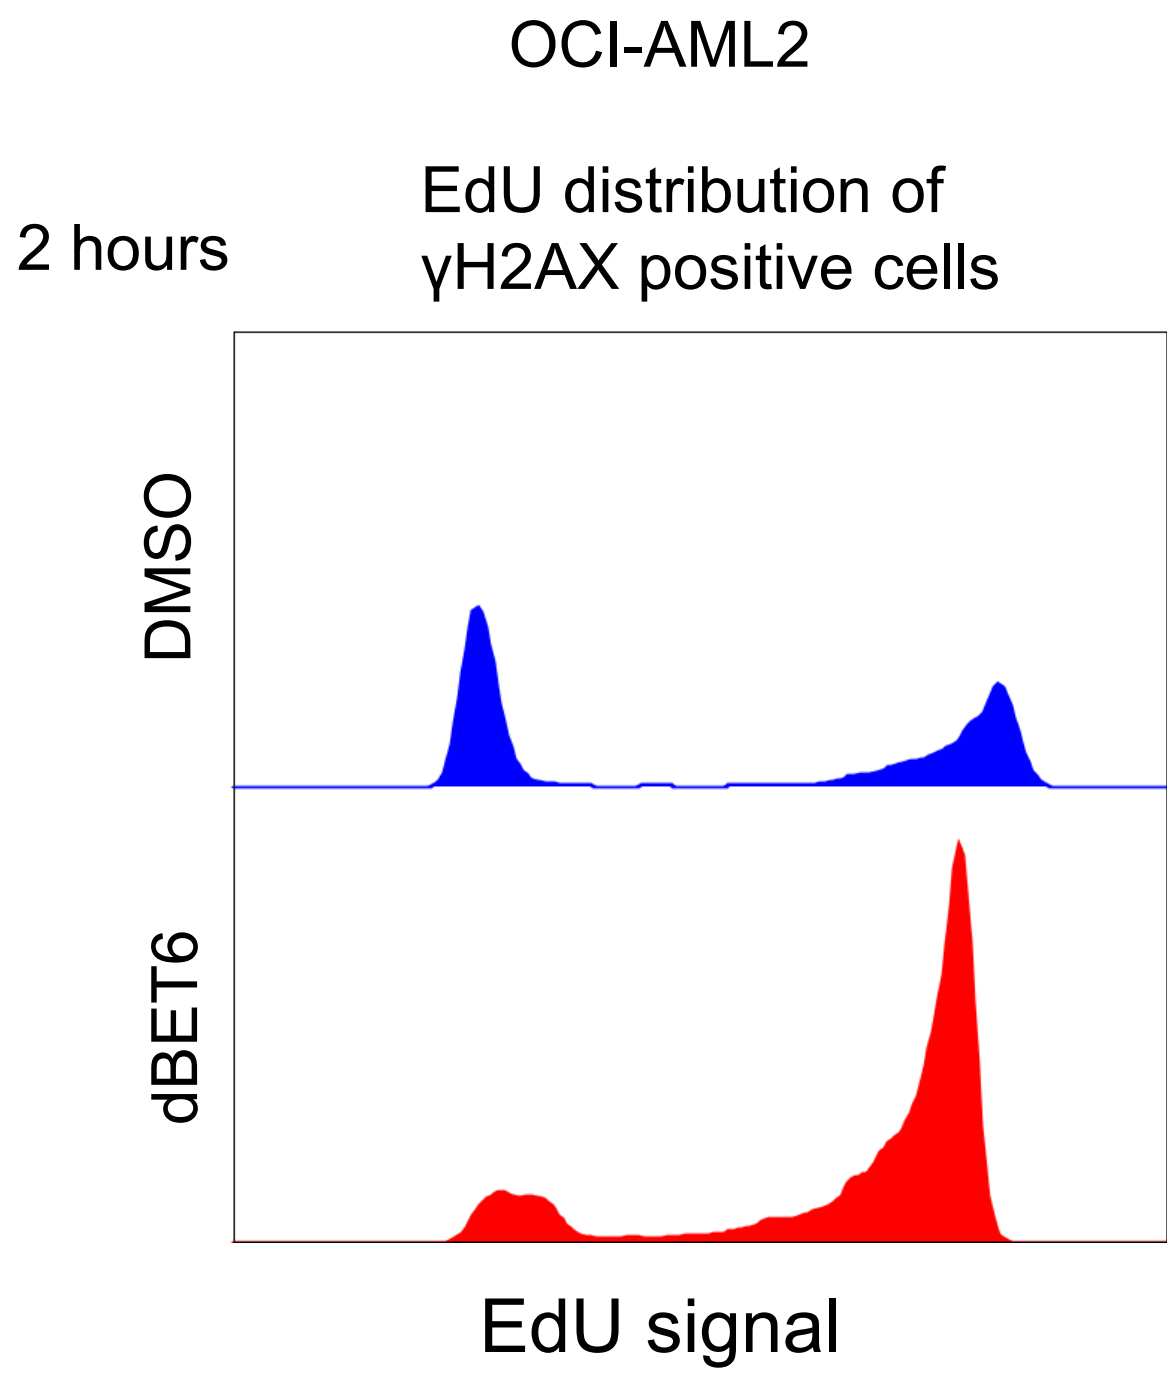**B**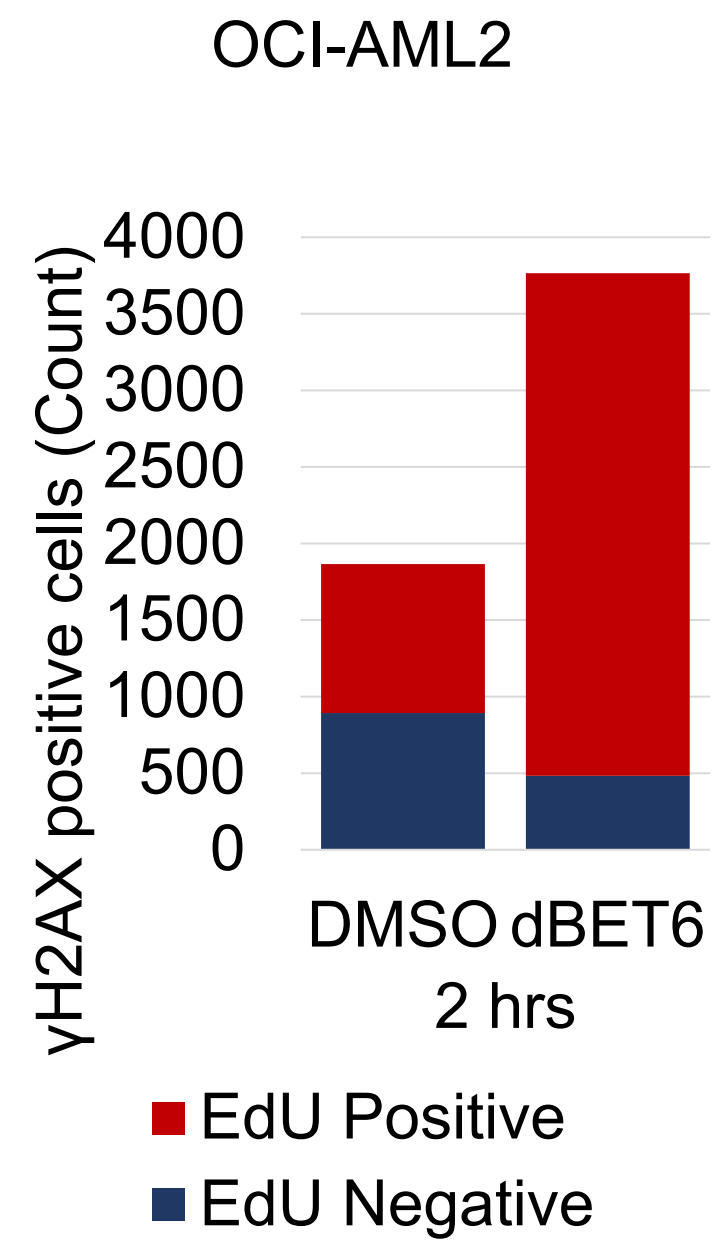

Figure S2



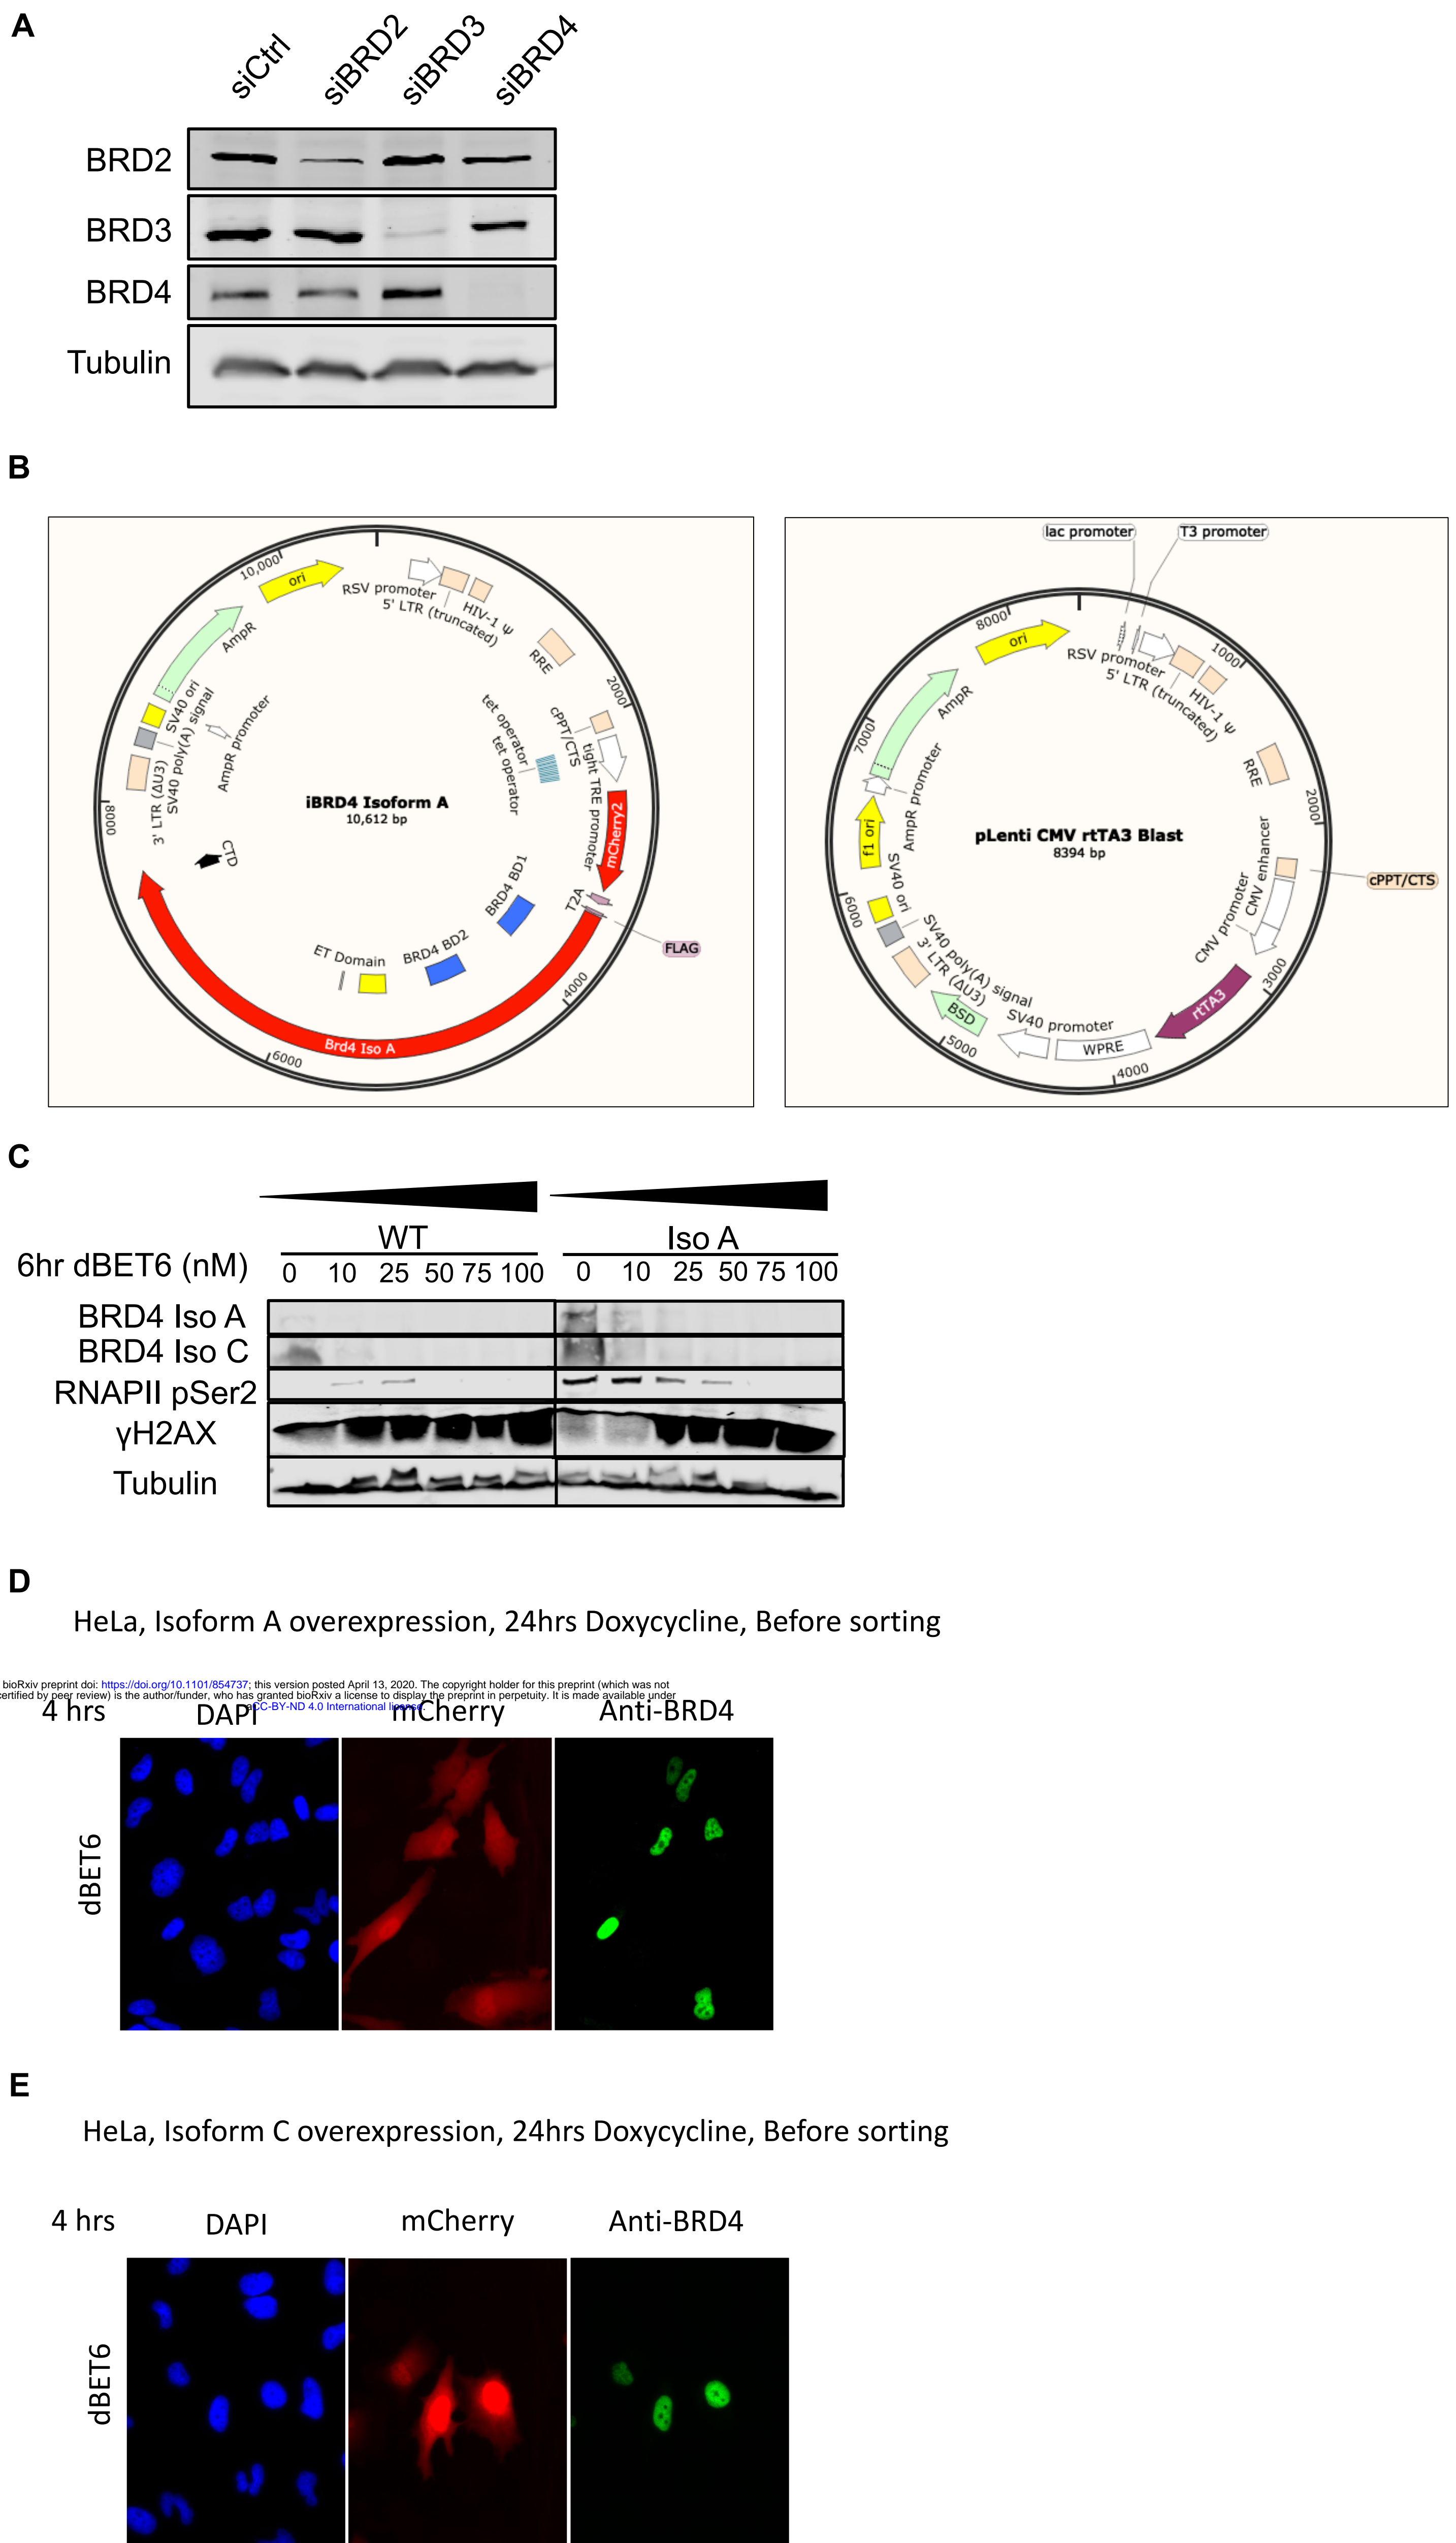

Figure S3

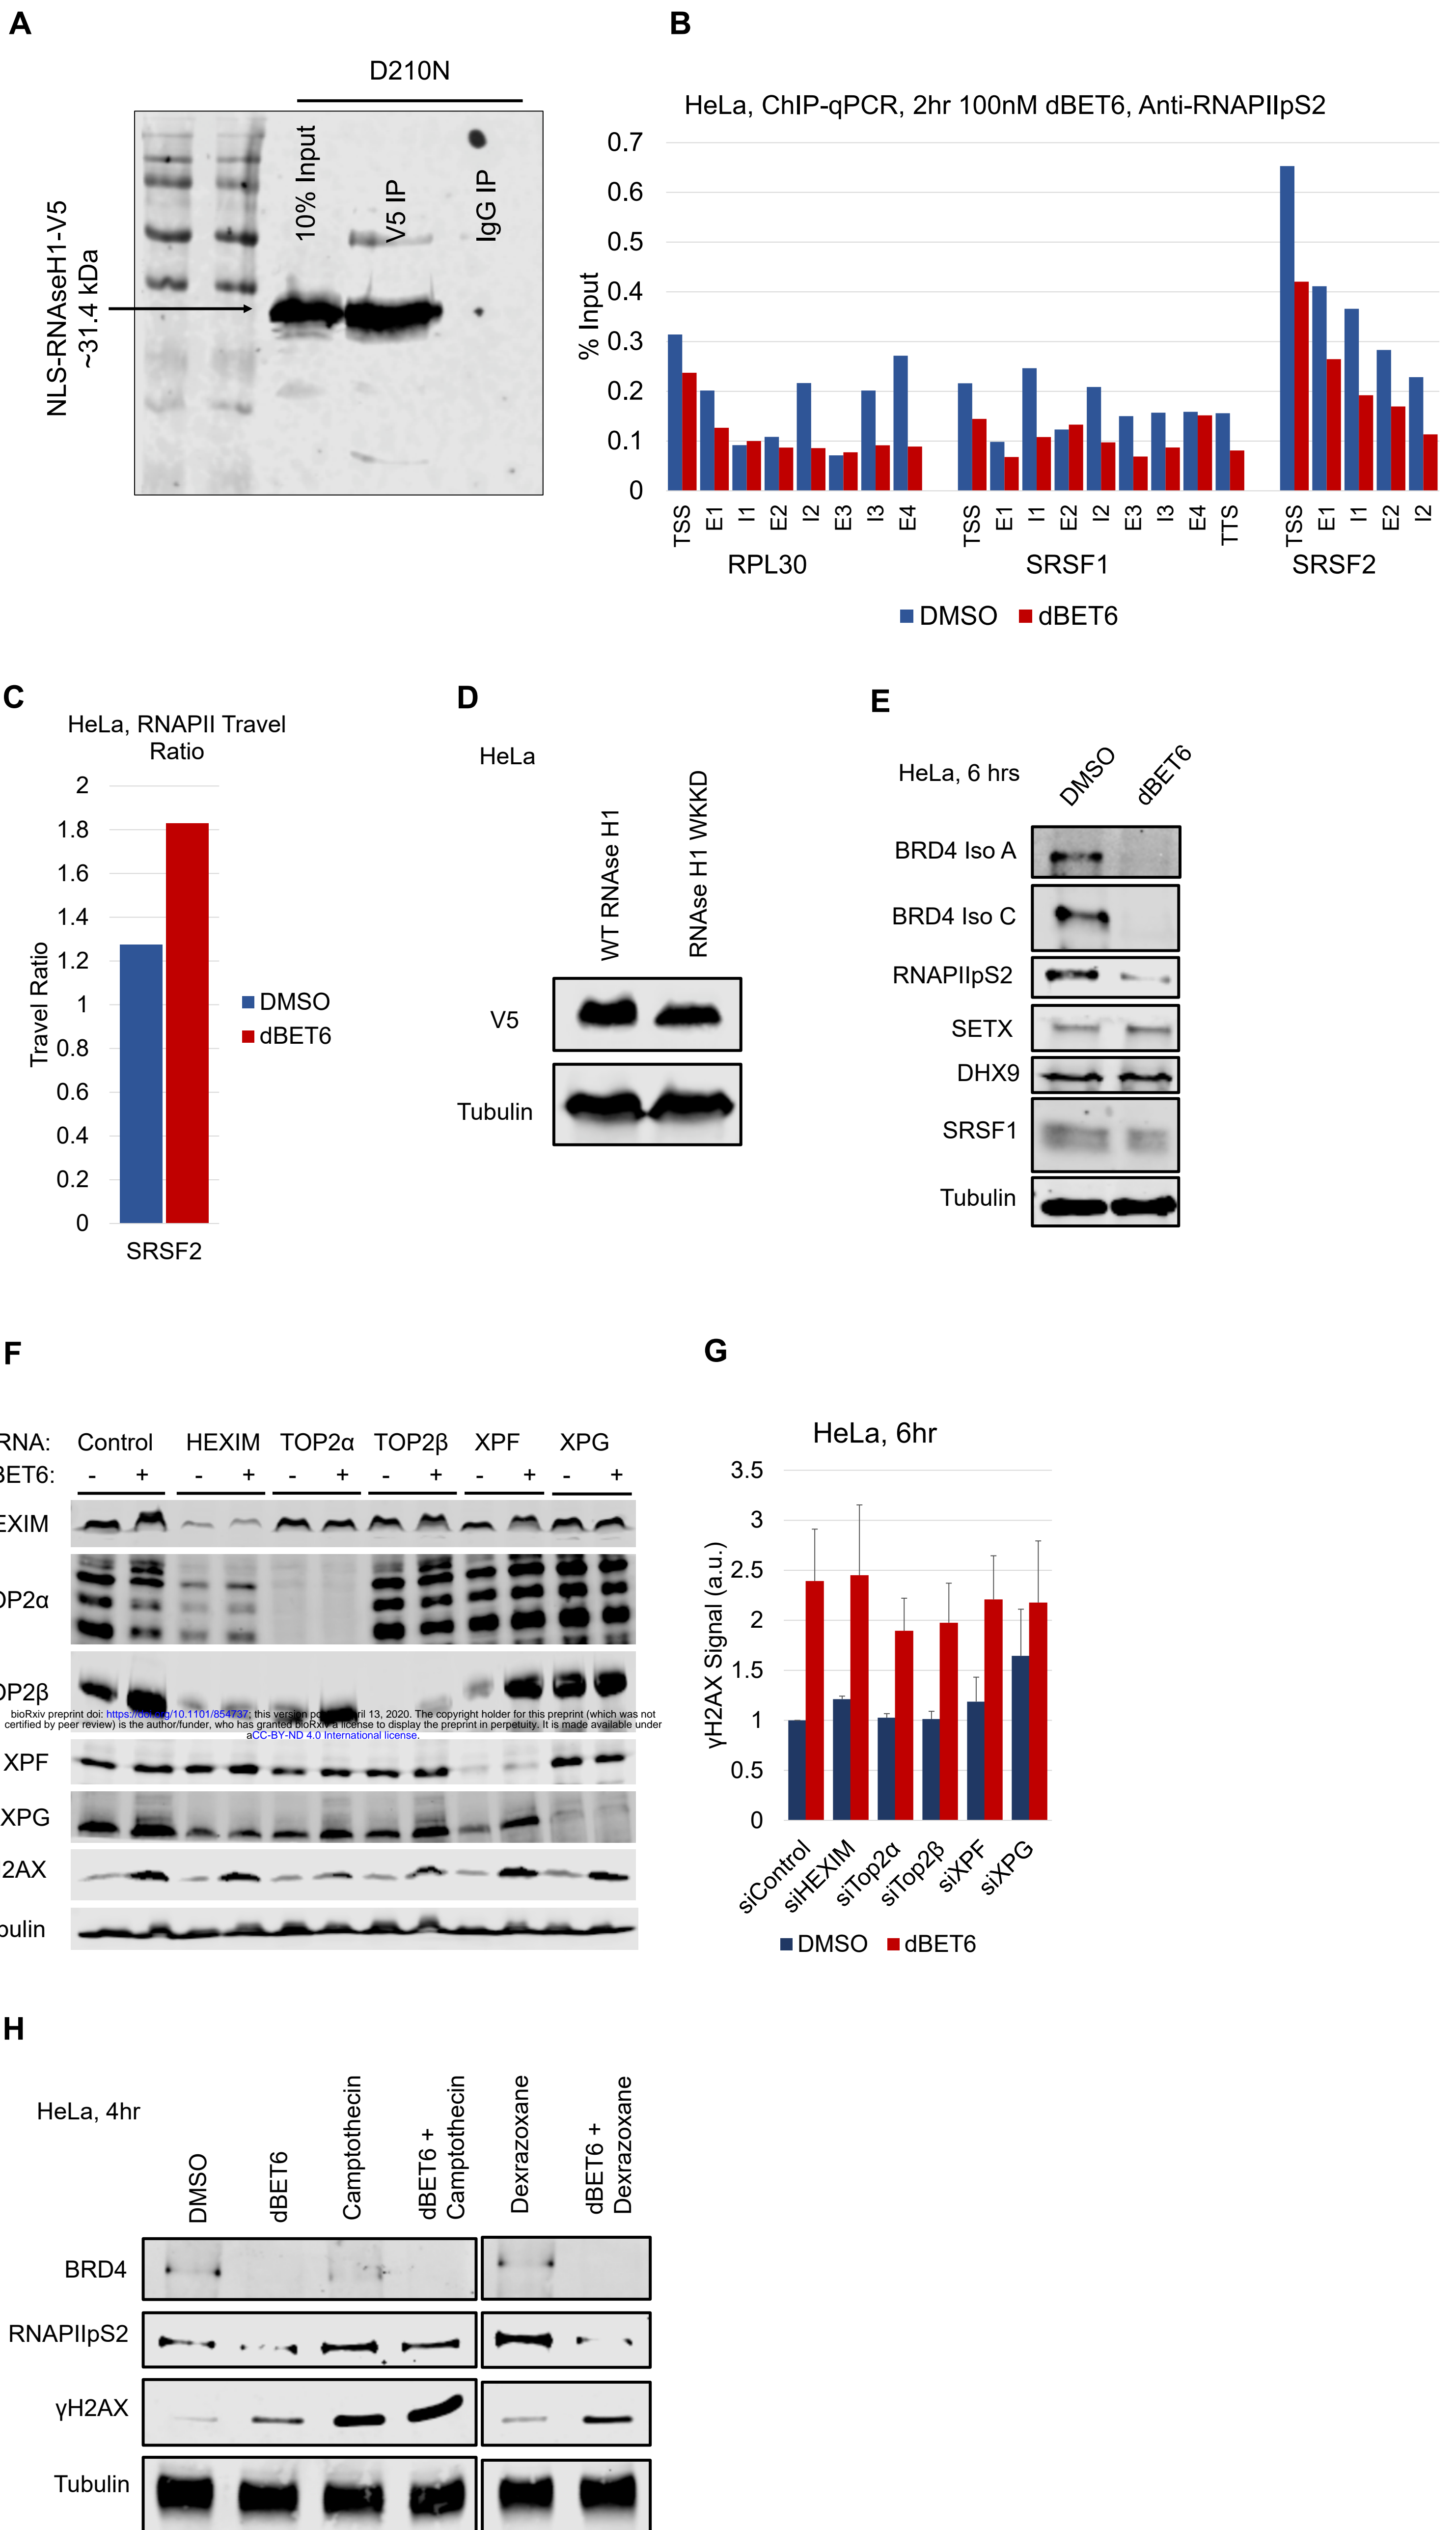

Figure S4



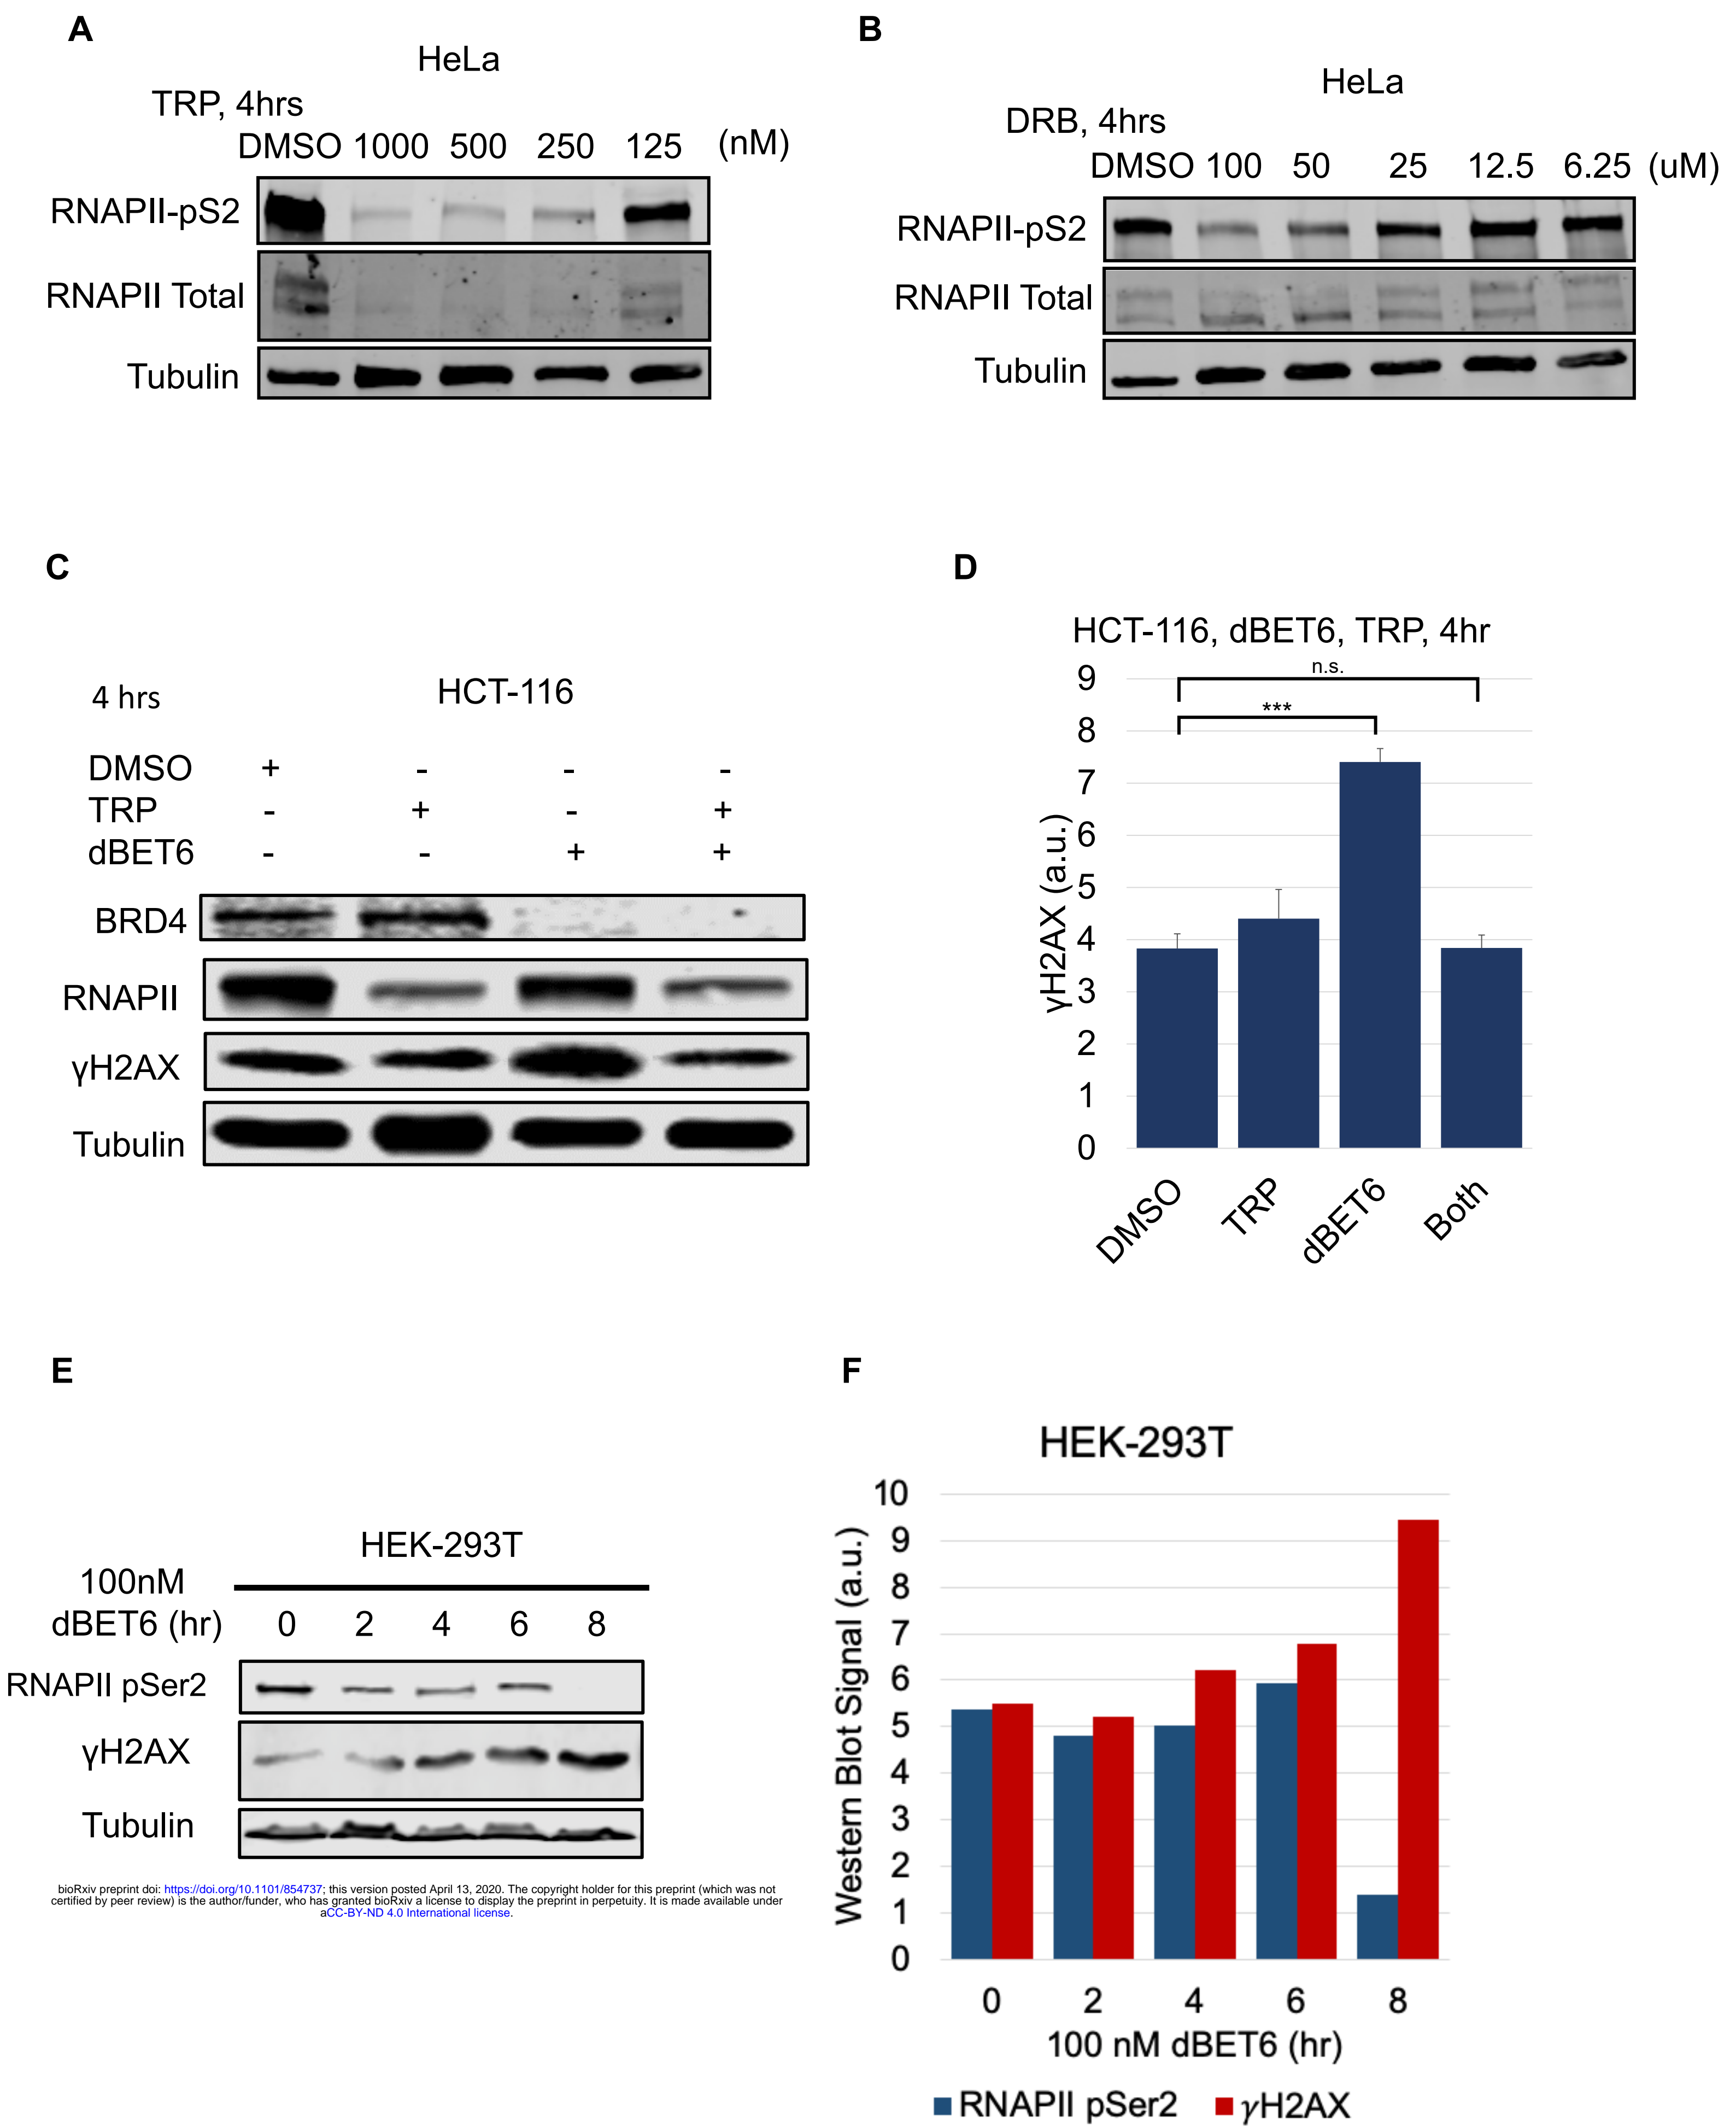

Figure S5
